# Supplementary material
Source: publisher site journal article supplement (https://www.spandidos-publications.com/8624/downloadSupplementary)
Supplement: Supplementary file 1 [file downloadSupplementary]

## Sheet: Table S1
Table SI. ​Differentially expressed genes between pancreatic cancer tissues and normal tissues in the TCGA-PAAD cohort obtained from GEPIA2.
Gene Symbol	Gene ID	Median (Tumor)	Median (Normal)	Log2(Fold Change)	adjp
A2M	ENSG00000175899.14	183.787	28.3	2.657	1.29e-49
A4GALT	ENSG00000128274.15	17.14	2.2	2.503	2.69e-48
AACS	ENSG00000081760.16	15.64	6.74	1.104	5.73e-40
AADAC	ENSG00000114771.13	4.32	10.68	-1.135	4.16e-08
AAED1	ENSG00000158122.11	7.5	2.08	1.465	6.02e-57
AAGAB	ENSG00000103591.12	24.92	7.61	1.59	1.64e-66
AAMDC	ENSG00000087884.14	42.739	12.78	1.666	3.29e-55
AAMP	ENSG00000127837.9	i	34.951	1.572	8.52e-50
AAR2	ENSG00000131043.11	23.61	6.82	1.654	2.6e-67
AASS	ENSG00000008311.14	2.85	9.27	-1.415	2.35e-27
AATF	ENSG00000275700.4	38.239	14.08	1.38	1.24e-42
ABAT	ENSG00000183044.11	6.34	16.71	-1.271	8.49e-11
ABC7-42404400C24.1	ENSG00000277758.4	0.17	1.49	-1.09	2.06e-37
ABCA1	ENSG00000165029.15	4.22	1.43	1.103	2.87e-27
ABCA2	ENSG00000107331.16	27.5	11.58	1.18	2.37e-27
ABCA5	ENSG00000154265.15	7.37	22.88	-1.512	6.06e-30
ABCB1	ENSG00000085563.14	6.29	1.13	1.775	1.26e-36
ABCB10	ENSG00000135776.4	6.34	2.46	1.085	2.56e-41
ABCB4	ENSG00000005471.15	1.21	0.05	1.074	1.88e-41
ABCB6	ENSG00000115657.12	15.62	5.35	1.388	1.52e-40
ABCB7	ENSG00000131269.15	9.76	4.32	1.016	5.88e-41
ABCB8	ENSG00000197150.12	18.84	7.23	1.269	1.99e-44
ABCB9	ENSG00000150967.17	4.54	1.26	1.294	6.21e-49
ABCC1	ENSG00000103222.18	14.65	3.98	1.652	6.48e-49
ABCC4	ENSG00000125257.13	2.98	0.76	1.177	7.88e-42
ABCC5	ENSG00000114770.16	10.89	4.72	1.056	9.94e-25
ABCC6	ENSG00000091262.14	3.27	7.65	-1.018	3.81e-22
ABCD4	ENSG00000119688.20	36.839	16.999	1.072	1.3e-23
ABCF1	ENSG00000204574.12	32.599	13.65	1.198	1.1e-41
ABCF2	ENSG00000033050.7	20.201	6.5	1.499	1.48e-56
ABCG1	ENSG00000160179.18	16.66	1.21	2.998	1.62e-80
ABHD11-AS1	ENSG00000225969.1	10.2	1.07	2.436	2.17e-33
ABHD13	ENSG00000139826.5	4.95	1.42	1.298	1.52e-65
ABHD14A	ENSG00000248487.8	20.1	8.29	1.184	2.94e-34
ABHD14B	ENSG00000114779.19	54.761	26.339	1.028	2.74e-29
ABHD15	ENSG00000168792.4	8.36	2.95	1.245	9.53e-45
ABHD16A	ENSG00000204427.11	41.02	16.42	1.27	6.99e-38
ABHD17A	ENSG00000129968.15	39.461	18.88	1.025	2.41e-13
ABHD17B	ENSG00000107362.13	6.62	2.22	1.243	2.43e-48
ABHD17C	ENSG00000136379.11	35.111	2.48	3.375	1.6e-71
ABHD2	ENSG00000140526.16	47.5	13.68	1.724	2.99e-39
ABHD3	ENSG00000158201.9	17.019	5.2	1.539	4.32e-42
ABHD4	ENSG00000100439.10	22.221	6.38	1.654	7.95e-56
ABHD6	ENSG00000163686.13	4.42	0.99	1.446	4.59e-57
ABI1	ENSG00000136754.16	28.541	7.01	1.883	2.75e-59
ABI2	ENSG00000138443.15	15.47	3.1	2.006	1.72e-67
ABI3	ENSG00000108798.8	10.11	1.39	2.217	9.44e-48
ABI3BP	ENSG00000154175.16	12.85	2.5	1.984	1e-32
ABL1	ENSG00000097007.17	23.62	8.12	1.433	7.03e-40
ABL2	ENSG00000143322.19	4.8	1.62	1.146	5.67e-43
ABLIM1	ENSG00000099204.18	31.6	8.39	1.796	1.26e-43
ABLIM2	ENSG00000163995.18	8.28	2.01	1.624	2.67e-34
ABLIM3	ENSG00000173210.19	15.77	1.15	2.963	1.13e-67
ABR	ENSG00000159842.14	41.92	9.11	2.086	1.12e-59
ABRACL	ENSG00000146386.7	45.351	5.66	2.799	2.22e-64
ABT1	ENSG00000146109.4	10.85	3.58	1.371	1.53e-65
ABTB1	ENSG00000114626.17	32.11	12.62	1.282	8.5e-24
ABTB2	ENSG00000166016.5	4.57	0.8	1.63	4.65e-46
AC000089.3	ENSG00000235776.2	2.44	0.34	1.36	2.59e-73
AC000111.4	ENSG00000237974.1	0	1.18	-1.124	6.77e-18
AC002398.12	ENSG00000267328.1	3.36	0.55	1.492	1.5e-17
AC002398.9	ENSG00000188223.9	6.05	1.62	1.428	1.47e-52
AC002467.7	ENSG00000241764.3	2.93	0.9	1.049	8.15e-48
AC005152.3	ENSG00000228639.6	0.32	4.91	-2.163	7.49e-43
AC005255.3	ENSG00000256210.3	5.78	0	2.761	5.06e-70
AC005339.2	ENSG00000268565.1	5.63	0.47	2.173	2.2e-51
AC005355.2	ENSG00000251169.2	2.54	0.21	1.549	9.85e-54
AC005562.1	ENSG00000214719.11	3.9	1.38	1.042	3.74e-54
AC005786.7	ENSG00000267436.1	8.19	0.26	2.867	3.14e-30
AC005943.2	ENSG00000267059.2	4.19	0	2.376	7.62e-23
AC005943.6	ENSG00000279009.1	5.18	0	2.628	4.28e-15
AC005944.2	ENSG00000267469.1	19.401	2.32	2.619	3.84e-40
AC006011.4	ENSG00000244563.1	8.35	2.31	1.498	3.07e-30
AC007192.6	ENSG00000269145.2	6.75	2.47	1.159	1.62e-15
AC007229.3	ENSG00000267544.1	1.68	0.18	1.183	1.19e-60
AC007283.5	ENSG00000234431.2	5.52	0	2.705	2.31e-68
AC007318.5	ENSG00000172974.11	8.61	2.54	1.441	1.45e-53
AC007349.4	ENSG00000229424.1	0	1.38	-1.251	2.61e-50
AC007383.3	ENSG00000227946.1	5.55	1.43	1.431	3.4e-54
AC007620.3	ENSG00000242539.2	4.56	0.48	1.91	2.92e-44
AC009005.2	ENSG00000267751.5	1.96	0.31	1.176	2.84e-37
AC009014.3	ENSG00000271824.1	1.28	0.12	1.026	2.61e-17
AC009065.4	ENSG00000279473.1	3.66	0	2.22	4e-86
AC009133.21	ENSG00000275857.1	1.7	0.3	1.054	6.7e-23
AC009133.22	ENSG00000277669.1	0	1.19	-1.131	1.16e-25
AC011298.2	ENSG00000219159.4	0.16	15.39	-3.821	3.55e-88
AC011558.5	ENSG00000279753.1	104.27	13.79	2.831	1.86e-34
AC016629.7	ENSG00000269032.1	1.2	0	1.137	3.66e-08
AC016735.2	ENSG00000231826.5	1.91	0.06	1.457	6.01e-20
AC016739.2	ENSG00000218175.2	17.45	5.66	1.47	3.6e-27
AC016747.3	ENSG00000212978.6	4.78	1.26	1.355	5.45e-45
AC018816.3	ENSG00000235978.6	2.29	0.16	1.504	4.67e-51
AC019117.2	ENSG00000236039.1	2.55	0.52	1.224	6.95e-19
AC021066.1	ENSG00000281415.1	129.48	6.07	4.206	6.79e-18
AC021218.2	ENSG00000204876.4	1.74	0	1.454	1.65e-28
AC025811.3	ENSG00000270947.1	0	1.24	-1.163	1.09e-51
AC027612.6	ENSG00000143429.9	18.56	4.04	1.956	1.7e-54
AC068831.17	ENSG00000275929.1	0	1.59	-1.373	7.08e-63
AC073842.19	ENSG00000235077.1	0	1.08	-1.057	7.6e-34
AC074212.6	ENSG00000267395.5	0.88	3.23	-1.17	1.23e-42
AC078941.1	ENSG00000236780.5	0.93	22.95	-3.633	4.68e-62
AC079767.4	ENSG00000224137.1	1.35	0	1.233	3.06e-23
AC092580.4	ENSG00000235576.1	2.9	0	1.964	3.65e-32
AC093323.3	ENSG00000170846.15	8.22	2.24	1.509	5.87e-52
AC093642.1	ENSG00000280119.1	0.07	2.05	-1.511	1.2e-54
AC093642.3	ENSG00000237940.3	0.73	12.44	-2.958	1.85e-64
AC093673.5	ENSG00000232533.1	11.83	1.03	2.66	2.43e-73
AC093850.2	ENSG00000230838.1	5.16	0	2.623	1.2e-47
AC098614.2	ENSG00000213846.4	2.22	0.21	1.412	2.18e-57
AC106876.2	ENSG00000222001.2	3.31	0.65	1.385	1.04e-19
AC112497.1	ENSG00000279413.1	2.97	0.57	1.338	2.19e-51
AC113188.2	ENSG00000279535.1	7.3	1.47	1.749	8.84e-38
AC113404.1	ENSG00000254893.5	2.53	0.35	1.387	1.58e-53
AC114730.11	ENSG00000235351.1	0.57	2.23	-1.041	2.61e-40
AC124789.1	ENSG00000276170.4	1.81	0.18	1.252	2.41e-27
AC129492.1	ENSG00000279152.1	0.22	1.59	-1.086	1.16e-21
AC131097.4	ENSG00000216921.7	0.19	12.14	-3.465	4.18e-63
AC132217.4	ENSG00000240801.1	28.779	4.74	2.375	1.64e-18
AC133644.2	ENSG00000280721.1	3.64	0.22	1.927	4.29e-57
AC144530.1	ENSG00000234742.1	1.68	0.24	1.112	7.89e-57
AC147651.4	ENSG00000237181.1	1.57	0.15	1.16	2.23e-35
AC156455.1	ENSG00000256546.1	2.03	11.43	-2.036	5.79e-52
AC234582.1	ENSG00000279487.1	25.419	8.36	1.497	4.14e-07
AC239868.2	ENSG00000280874.1	26.06	0.25	4.436	1.61e-41
AC239868.3	ENSG00000281134.1	26.06	0.25	4.436	1.61e-41
AC241377.2	ENSG00000281741.1	2.2	0.53	1.065	8.44e-33
AC241585.2	ENSG00000281571.1	7.45	2.33	1.343	6.46e-34
AC245100.1	ENSG00000280649.1	7.11	1.86	1.504	1.92e-49
ACAA2	ENSG00000167315.17	50.021	21.299	1.194	4.62e-38
ACACA	ENSG00000278540.4	12.6	4.54	1.296	2.69e-48
ACADL	ENSG00000115361.7	0.66	16.959	-3.435	8.45e-92
ACADVL	ENSG00000072778.19	283.793	571.218	-1.007	6.21e-12
ACAN	ENSG00000157766.15	1.45	0.13	1.116	5.13e-29
ACAP1	ENSG00000072818.11	8.29	1.75	1.756	2.01e-33
ACAP2	ENSG00000114331.12	8.9	2.71	1.416	5.81e-49
ACAT2	ENSG00000120437.8	12.46	2.9	1.787	1.33e-40
ACBD3	ENSG00000182827.8	27.701	6.74	1.891	2.39e-60
ACBD5	ENSG00000107897.18	12.88	2.93	1.82	2.05e-60
ACBD6	ENSG00000230124.6	32.421	14.98	1.064	1.58e-34
ACD	ENSG00000102977.13	17.96	8.44	1.006	1.7e-28
ACE	ENSG00000159640.14	19.311	1.95	2.783	5.18e-79
ACE2	ENSG00000130234.10	3.03	0.96	1.04	4.86e-14
ACER3	ENSG00000078124.11	5.16	1.13	1.532	1.38e-65
ACHE	ENSG00000087085.13	7.13	1.34	1.797	1.2e-30
ACKR1	ENSG00000213088.9	17.179	4.79	1.651	4.55e-11
ACKR4	ENSG00000129048.6	3.36	0.71	1.35	6.49e-28
ACLY	ENSG00000131473.16	46.931	15.73	1.519	2.14e-48
ACO2	ENSG00000100412.15	51.111	20.98	1.245	3.28e-44
ACOT1	ENSG00000184227.7	4.01	1.07	1.275	7.76e-49
ACOT11	ENSG00000162390.17	6.01	1.13	1.719	2.42e-54
ACOT13	ENSG00000112304.10	14.71	4.02	1.646	5.69e-65
ACOT2	ENSG00000119673.14	19.419	5.89	1.567	4.33e-54
ACOT4	ENSG00000177465.4	2.05	0.52	1.005	6.57e-44
ACOT7	ENSG00000097021.19	25.189	3.51	2.538	1.69e-77
ACOT8	ENSG00000101473.16	23.41	7.91	1.454	2.26e-58
ACOT9	ENSG00000123130.16	30.511	8.97	1.66	1.71e-39
ACP5	ENSG00000102575.10	55.479	5.22	3.183	2.18e-52
ACP6	ENSG00000162836.11	21.19	7.41	1.4	2.99e-36
ACSL1	ENSG00000151726.13	34.229	13.34	1.297	5.6e-32
ACSL3	ENSG00000123983.13	38.869	6.61	2.389	9.39e-76
ACSL4	ENSG00000068366.19	17.629	2.54	2.396	4.33e-66
ACSL5	ENSG00000197142.10	45.251	1.71	4.093	1.51e-66
ACSS2	ENSG00000131069.19	26.37	11.26	1.159	9.3e-27
ACTA1	ENSG00000143632.14	0.09	1.66	-1.287	1.65e-27
ACTA2	ENSG00000107796.12	540.517	26.339	4.308	1.25e-61
ACTB	ENSG00000075624.13	4048.58	313.147	3.688	3.47e-69
ACTG1	ENSG00000184009.9	2287.41	809.731	1.497	9.08e-26
ACTG2	ENSG00000163017.13	16.64	2.09	2.513	5.45e-28
ACTL6A	ENSG00000136518.16	32.291	11.94	1.363	2.4e-45
ACTN1	ENSG00000072110.13	151.355	22.529	2.695	2.51e-62
ACTN4	ENSG00000130402.11	302.983	49.07	2.602	7.72e-59
ACTR10	ENSG00000131966.13	58.561	19.16	1.563	8.52e-52
ACTR1A	ENSG00000138107.11	59.21	16.71	1.765	2.84e-62
ACTR2	ENSG00000138071.13	83.562	11.58	2.749	2.86e-75
ACTR3	ENSG00000115091.11	105.36	14.8	2.751	5.1e-63
ACTR6	ENSG00000075089.9	11.6	3.41	1.515	2e-59
ACTR8	ENSG00000113812.13	12.94	5.39	1.125	5.52e-43
ACVR1	ENSG00000115170.13	25.81	3.66	2.524	1.31e-78
ACVR2A	ENSG00000121989.14	6.1	2.23	1.136	2.38e-40
ACVRL1	ENSG00000139567.12	13.93	5.11	1.289	1.04e-29
ACY1	ENSG00000243989.7	40.14	7.21	2.325	5.7e-52
ACYP1	ENSG00000119640.8	15.48	4.17	1.672	2.12e-46
ADA	ENSG00000196839.12	8.39	2.65	1.363	3.11e-35
ADAM10	ENSG00000137845.14	41.599	6.66	2.475	3.42e-57
ADAM12	ENSG00000148848.14	5.1	0.05	2.538	1.02e-46
ADAM15	ENSG00000143537.13	106.957	22.6	2.194	1.07e-48
ADAM17	ENSG00000151694.12	9.17	1.79	1.866	1.24e-56
ADAM19	ENSG00000135074.15	8.42	0.24	2.925	1.04e-62
ADAM22	ENSG00000008277.14	2.1	0.24	1.322	2.49e-44
ADAM23	ENSG00000114948.12	1.98	0.15	1.374	2.99e-46
ADAM28	ENSG00000042980.12	29.67	1.84	3.433	1.06e-52
ADAM8	ENSG00000151651.15	28.889	2.46	3.111	2.67e-54
ADAM9	ENSG00000168615.11	71.322	5.26	3.53	2.06e-70
ADAMDEC1	ENSG00000134028.14	1.64	0.05	1.33	1.21e-29
ADAMTS12	ENSG00000151388.10	6.53	0.18	2.674	8.86e-57
ADAMTS14	ENSG00000138316.10	2.95	0.05	1.911	7.82e-51
ADAMTS2	ENSG00000087116.13	22.409	2.05	2.94	4.2e-60
ADAMTS4	ENSG00000158859.9	6.94	1.19	1.858	8.25e-26
ADAMTS7	ENSG00000136378.14	3.1	0.25	1.714	2.71e-51
ADAMTS9	ENSG00000163638.13	11.36	4.35	1.208	9.64e-19
ADAMTSL1	ENSG00000178031.15	1.79	0.22	1.193	4.05e-36
ADAMTSL2	ENSG00000197859.9	12.12	2.29	1.996	9.07e-41
ADAMTSL4	ENSG00000143382.13	11.79	2.97	1.688	1.44e-24
ADAMTSL5	ENSG00000185761.10	2.95	0.33	1.57	8.32e-35
ADAP1	ENSG00000105963.13	43.761	5.76	2.727	5.33e-32
ADAP2	ENSG00000184060.10	4.64	1.32	1.282	5.27e-30
ADAR	ENSG00000160710.15	62.808	19.77	1.619	1.48e-46
ADAT1	ENSG00000065457.10	19.55	5.63	1.632	8.21e-65
ADCK2	ENSG00000133597.9	18.98	4.94	1.75	1.1e-67
ADCK3	ENSG00000163050.16	23.86	63.258	-1.37	5.66e-35
ADCK4	ENSG00000123815.11	25.509	9.88	1.285	2.16e-39
ADCY2	ENSG00000078295.15	1.8	0.25	1.163	5.39e-32
ADCY3	ENSG00000138031.14	26.39	7.14	1.751	1.46e-43
ADCY7	ENSG00000121281.12	8.25	1.01	2.202	1.43e-48
ADD1	ENSG00000087274.16	114.063	39.3	1.514	1.83e-44
ADD3	ENSG00000148700.13	39.42	18.57	1.046	2.27e-17
ADGRA2	ENSG00000020181.17	17.759	1.7	2.797	9.99e-57
ADGRB2	ENSG00000121753.12	2.9	0.17	1.737	5.16e-65
ADGRE2	ENSG00000127507.17	1.54	0.26	1.011	1.31e-27
ADGRE5	ENSG00000123146.19	62.769	12.35	2.256	3.76e-45
ADGRF1	ENSG00000153292.15	11.63	0.08	3.548	1.38e-54
ADGRF4	ENSG00000153294.11	2.16	0.01	1.646	2.55e-52
ADGRF5	ENSG00000069122.18	6.64	2	1.349	1.28e-35
ADGRG1	ENSG00000205336.11	92.308	21.85	2.03	6.39e-47
ADGRG6	ENSG00000112414.14	8.16	0.79	2.355	3.36e-50
ADGRL2	ENSG00000117114.19	12.11	4.15	1.348	3.03e-32
ADGRL4	ENSG00000162618.12	9.76	1.83	1.927	1.01e-45
ADH1C	ENSG00000248144.5	20.129	4.16	2.034	2.01e-14
ADH5	ENSG00000197894.10	81.871	22.99	1.788	5.37e-54
ADHFE1	ENSG00000147576.15	3.18	16.549	-2.07	5.53e-57
ADI1	ENSG00000182551.13	40.14	12.63	1.594	9.07e-50
ADIPOR1	ENSG00000159346.12	69.261	26.379	1.36	4.33e-46
ADIPOR2	ENSG00000006831.9	26.451	11.55	1.129	3.57e-24
ADIRF	ENSG00000148671.13	72.932	18.79	1.901	4.15e-28
ADIRF-AS1	ENSG00000272734.1	1.59	4.32	-1.039	2.03e-19
ADK	ENSG00000156110.13	16.919	5.83	1.392	1.93e-52
ADM	ENSG00000148926.9	21.739	4.97	1.929	1.62e-27
ADNP	ENSG00000101126.15	21.9	7.25	1.473	8.85e-49
ADO	ENSG00000181915.4	9.81	1.86	1.918	1.12e-87
ADORA2A	ENSG00000128271.19	3.17	0.74	1.261	1.78e-34
ADORA2B	ENSG00000170425.3	3.91	0.53	1.682	1.62e-47
ADORA3	ENSG00000121933.17	2.48	0.32	1.399	1.16e-33
ADPRHL2	ENSG00000116863.10	26.859	6.23	1.946	1.19e-69
ADRBK1	ENSG00000173020.10	61.541	16.19	1.863	1.2e-49
ADRM1	ENSG00000130706.12	89.989	31.541	1.483	5.5e-43
ADSS	ENSG00000035687.9	28.67	7.37	1.826	8.03e-59
ADTRP	ENSG00000111863.12	3.85	0.1	2.14	9.59e-45
AEBP1	ENSG00000106624.8	274.24	12.62	4.337	7e-65
AEBP2	ENSG00000139154.14	10.98	3.6	1.381	2.9e-49
AES	ENSG00000104964.14	484.75	175.666	1.459	1.02e-31
AF001548.5	ENSG00000263335.1	2.67	0.45	1.34	5.83e-43
AF127577.10	ENSG00000229047.1	14.77	4.29	1.576	5.58e-26
AF131216.5	ENSG00000255020.1	0.05	6.32	-2.801	9.09e-59
AFAP1	ENSG00000196526.10	13.4	1.19	2.717	7.28e-77
AFAP1-AS1	ENSG00000272620.1	4.46	0.02	2.42	4.39e-39
AFAP1L1	ENSG00000157510.13	3.37	0.53	1.514	5.75e-52
AFAP1L2	ENSG00000169129.14	12.51	5.66	1.02	2.59e-11
AFF4	ENSG00000072364.12	14.57	5.16	1.338	8.4e-39
AFG3L2	ENSG00000141385.9	24.12	10.35	1.146	1.17e-40
AFTPH	ENSG00000119844.14	29.86	10	1.488	4.03e-60
AGA	ENSG00000038002.8	14.18	5.15	1.303	4.81e-48
AGAP1	ENSG00000157985.17	7.46	2.24	1.385	1.12e-51
AGAP2-AS1	ENSG00000255737.2	14.68	4.89	1.413	1.56e-43
AGFG1	ENSG00000173744.17	42.241	10.87	1.865	4.84e-47
AGFG2	ENSG00000106351.12	28.929	11.27	1.286	6e-27
AGGF1	ENSG00000164252.12	8.04	2.7	1.289	8e-57
AGK	ENSG00000006530.15	10.26	4.28	1.093	4.92e-38
AGMAT	ENSG00000116771.5	1.48	0.18	1.072	1.54e-35
AGMO	ENSG00000187546.13	1.53	0.02	1.311	6.3e-33
AGO2	ENSG00000123908.11	5.74	2.09	1.125	1.15e-35
AGPAT1	ENSG00000204310.10	53.16	13.47	1.904	1.43e-68
AGPAT2	ENSG00000169692.12	100.071	46.24	1.097	6.24e-17
AGPAT4	ENSG00000026652.13	3.47	0.78	1.328	2.98e-42
AGPAT5	ENSG00000155189.11	7.59	2.58	1.263	2.11e-48
AGPAT9	ENSG00000138678.10	3.23	0.43	1.565	3.86e-53
AGPS	ENSG00000018510.12	8.31	2.74	1.316	2.98e-47
AGR2	ENSG00000106541.11	438.276	4.23	6.392	9.21e-71
AGR3	ENSG00000173467.8	67.878	1.67	4.689	7.12e-57
AGRN	ENSG00000188157.13	78.21	20.559	1.877	4.5e-29
AGT	ENSG00000135744.7	16.05	2.23	2.4	3.26e-34
AGTRAP	ENSG00000177674.15	58.399	21.31	1.413	5.41e-21
AHCTF1	ENSG00000153207.14	14.12	4.71	1.405	6.69e-54
AHCYL1	ENSG00000168710.17	42.019	18.77	1.122	1.68e-33
AHCYL2	ENSG00000158467.16	18.371	4.62	1.785	7.98e-34
AHDC1	ENSG00000126705.13	8.21	3.32	1.092	7.95e-25
AHNAK	ENSG00000124942.13	87.262	11.45	2.826	2.66e-60
AHNAK2	ENSG00000185567.6	40.509	0.51	4.781	7.55e-69
AHR	ENSG00000106546.12	32.32	2.3	3.336	2.85e-74
AHSA1	ENSG00000100591.7	98.879	26.08	1.883	3.65e-61
AIDA	ENSG00000186063.12	39.901	10.89	1.782	1.3e-60
AIF1	ENSG00000204472.12	59.218	3.67	3.689	9.7e-59
AIFM1	ENSG00000156709.13	23.11	9.97	1.136	2.71e-50
AIFM2	ENSG00000042286.14	8.92	1.84	1.804	3.07e-68
AIG1	ENSG00000146416.16	29.871	6.48	2.045	3.54e-72
AIM1	ENSG00000112297.14	7.01	1.4	1.739	1.93e-43
AIM1L	ENSG00000176092.13	9	0.16	3.108	1.34e-55
AIMP1	ENSG00000164022.16	29.009	11.79	1.23	5.84e-43
AIMP2	ENSG00000106305.9	21.78	5.48	1.814	2.58e-64
AIP	ENSG00000110711.9	71.699	18.63	1.889	3.24e-59
AJUBA	ENSG00000129474.15	7.03	2.46	1.215	3.45e-25
AK1	ENSG00000106992.17	80.359	14.47	2.395	4.75e-65
AK2	ENSG00000004455.16	97.639	34.961	1.456	1.06e-45
AK3	ENSG00000147853.16	26.4	12.56	1.015	3.57e-25
AK4	ENSG00000162433.14	8.98	0.31	2.929	2.19e-64
AK4P1	ENSG00000263535.1	1.75	0.09	1.335	5.48e-42
AK6	ENSG00000085231.13	30.279	13.68	1.091	6.25e-38
AK7	ENSG00000140057.8	2.5	0.55	1.175	8.05e-43
AK8	ENSG00000165695.9	1.67	0.25	1.095	2.2e-38
AKAP1	ENSG00000121057.12	28.3	9.31	1.507	3.19e-45
AKAP11	ENSG00000023516.8	7.38	2.23	1.375	2.72e-46
AKAP12	ENSG00000131016.16	14.8	1.72	2.538	2.77e-43
AKAP13	ENSG00000170776.19	54.288	19.39	1.439	1.84e-32
AKAP2	ENSG00000241978.9	16.57	2.05	2.526	1.27e-56
AKIP1	ENSG00000166452.11	18.181	4.71	1.748	7.22e-62
AKIRIN1	ENSG00000174574.15	22.31	7.01	1.541	7.31e-53
AKIRIN2	ENSG00000135334.8	21.08	5.82	1.695	4.97e-59
AKNA	ENSG00000106948.16	12.4	3.59	1.546	5.92e-29
AKR1B1	ENSG00000085662.13	55.691	15.36	1.793	2.21e-43
AKR1B10	ENSG00000198074.9	22.641	0.24	4.253	7.65e-45
AKR1C1	ENSG00000187134.12	21.11	9.32	1.099	2.54e-11
AKR1C2	ENSG00000151632.16	17.2	3.34	2.068	4.25e-28
AKR1C3	ENSG00000196139.11	79.688	14.57	2.374	9.27e-35
AKR7A2	ENSG00000053371.12	44.529	19.28	1.167	1.81e-37
AKR7A3	ENSG00000162482.4	17.34	104.69	-2.527	1.84e-21
AKR7L	ENSG00000211454.13	2.26	7.22	-1.334	1.79e-18
AKT1	ENSG00000142208.15	80.498	34.08	1.216	8.11e-35
AKT1S1	ENSG00000204673.10	33.91	13.81	1.237	1.97e-39
AKT3	ENSG00000117020.16	8.33	1.87	1.701	1.44e-41
AKTIP	ENSG00000166971.16	17.55	7.07	1.201	1.21e-44
AL158801.1	ENSG00000279392.1	2.57	0.1	1.698	3.85e-58
AL442127.1	ENSG00000278371.2	0	6.32	-2.872	1.56e-11
AL513523.2	ENSG00000279767.1	17.49	3.13	2.163	4.78e-42
AL928768.3	ENSG00000253701.2	2.93	0	1.975	1.01e-24
ALAS1	ENSG00000023330.14	37.53	6.31	2.398	1.87e-76
ALB	ENSG00000163631.16	4.14	255.857	-5.643	1.83e-58
ALCAM	ENSG00000170017.12	23.28	10.57	1.069	9.63e-20
ALDH1A3	ENSG00000184254.16	18.69	3.03	2.289	2.07e-38
ALDH1B1	ENSG00000137124.6	15.64	2.99	2.06	6.55e-53
ALDH1L1	ENSG00000144908.13	6.04	18.96	-1.503	7.3e-19
ALDH1L2	ENSG00000136010.13	2.51	9.61	-1.596	4.16e-26
ALDH2	ENSG00000111275.12	139.478	22.841	2.559	3.58e-56
ALDH3A1	ENSG00000108602.17	6.56	0.17	2.692	6.13e-31
ALDH3B1	ENSG00000006534.15	35.089	2.88	3.217	3.29e-46
ALDH4A1	ENSG00000159423.16	5.37	1.61	1.287	1.11e-42
ALDH7A1	ENSG00000164904.15	37.139	15.81	1.182	2.09e-32
ALDH9A1	ENSG00000143149.12	34.049	14	1.224	9.6e-44
ALDOA	ENSG00000149925.16	1162.08	235.763	2.296	1.45e-45
ALDOB	ENSG00000136872.17	15.72	45.86	-1.487	1.66e-09
ALDOC	ENSG00000109107.13	15.17	1.67	2.598	1.16e-63
ALG1	ENSG00000033011.11	21.7	10.33	1.003	1.83e-42
ALG11	ENSG00000253710.2	4.15	1.37	1.12	4.78e-49
ALG1L	ENSG00000189366.9	3.41	0.42	1.635	6.15e-26
ALG8	ENSG00000159063.12	29.49	9.08	1.597	3.6e-65
ALKBH1	ENSG00000100601.9	7.16	2.34	1.289	1.22e-58
ALKBH2	ENSG00000189046.10	16.29	7.32	1.055	4.97e-33
ALKBH4	ENSG00000160993.3	8.54	2.69	1.37	6.44e-61
ALKBH5	ENSG00000091542.8	42.75	15.58	1.4	1.12e-49
ALKBH6	ENSG00000239382.10	13.3	4.78	1.307	7.69e-42
ALOX15B	ENSG00000179593.15	2.1	0.24	1.322	1.11e-12
ALOX5	ENSG00000012779.10	44.479	14.48	1.555	1.05e-20
ALOX5AP	ENSG00000132965.9	63.579	4.64	3.517	2e-51
ALPK1	ENSG00000073331.17	7.73	3.12	1.083	1e-18
ALS2	ENSG00000003393.14	6.18	2.36	1.095	7.29e-42
ALYREF	ENSG00000183684.7	60.732	11.86	2.263	6.09e-74
AMACR	ENSG00000242110.7	10.04	3.48	1.301	2.13e-40
AMBRA1	ENSG00000110497.14	12.95	3.28	1.705	4.61e-64
AMDHD2	ENSG00000162066.14	17.03	6.39	1.287	8.64e-34
AMFR	ENSG00000159461.14	57.931	16.02	1.792	6.07e-66
AMHR2	ENSG00000135409.10	0.19	3.18	-1.813	5.78e-46
AMICA1	ENSG00000160593.17	12.89	0.95	2.833	6.09e-46
AMIGO2	ENSG00000139211.6	17.64	1.37	2.975	2.87e-66
AMMECR1	ENSG00000101935.9	4.12	0.98	1.371	6.85e-66
AMMECR1L	ENSG00000144233.9	9.15	3.9	1.051	1.04e-40
AMN	ENSG00000166126.10	13.17	0.38	3.36	5.61e-39
AMOT	ENSG00000126016.13	3.36	0.58	1.464	4.63e-48
AMOTL2	ENSG00000114019.14	14.97	6.38	1.114	3.7e-22
AMPD2	ENSG00000116337.15	32.61	15.43	1.033	2.57e-20
AMPD3	ENSG00000133805.15	6.19	1.48	1.536	1.25e-23
AMY1B	ENSG00000174876.16	0.04	1.34	-1.17	3.36e-08
AMY2A	ENSG00000243480.7	4.86	8429.9	-10.491	2.71e-41
AMY2B	ENSG00000240038.6	11.68	1523.74	-6.91	2.82e-49
AMYP1	ENSG00000227408.1	0.13	11.61	-3.48	4.02e-13
AMZ2	ENSG00000196704.11	42.611	16.22	1.341	3.55e-50
ANAPC10	ENSG00000164162.12	12	4.11	1.347	4.08e-60
ANAPC11	ENSG00000141552.17	134.298	40.87	1.692	2.59e-49
ANAPC13	ENSG00000129055.12	46.629	18.8	1.266	5.82e-44
ANAPC15	ENSG00000110200.8	37.139	14.94	1.259	6.13e-44
ANG	ENSG00000214274.9	33.541	11.18	1.504	4.33e-29
ANGEL1	ENSG00000013523.9	8	17.349	-1.028	4.46e-19
ANGPT2	ENSG00000091879.13	3.32	0.19	1.86	4.69e-60
ANGPTL2	ENSG00000136859.9	23.88	1.55	3.286	1.17e-65
ANK1	ENSG00000029534.19	1.99	0.33	1.169	8.34e-29
ANK2	ENSG00000145362.16	2.76	0.45	1.375	3.64e-32
ANKH	ENSG00000154122.12	53.16	9.39	2.382	2.93e-67
ANKIB1	ENSG00000001629.9	11.09	4.96	1.02	1.62e-31
ANKLE2	ENSG00000176915.14	32.199	13.43	1.202	9.76e-34
ANKMY2	ENSG00000106524.8	11.03	3.93	1.287	5.01e-52
ANKRD11	ENSG00000167522.14	32.951	13.53	1.224	8.33e-33
ANKRD13C	ENSG00000118454.12	6.37	2.51	1.07	1.63e-45
ANKRD13D	ENSG00000172932.14	28.46	8.93	1.569	9.66e-34
ANKRD20A5P	ENSG00000186481.15	0.84	3.82	-1.389	5.2e-26
ANKRD22	ENSG00000152766.5	13.59	3.98	1.551	6.3e-14
ANKRD27	ENSG00000105186.14	9.5	2.81	1.463	2.95e-57
ANKRD29	ENSG00000154065.16	3.76	0.44	1.725	1.91e-40
ANKRD35	ENSG00000198483.12	1.8	0.23	1.187	3e-46
ANKRD39	ENSG00000213337.8	11.16	3.69	1.374	6.52e-58
ANKRD42	ENSG00000137494.13	6.02	2.04	1.207	1.07e-57
ANKRD50	ENSG00000151458.11	5.12	0.83	1.742	2.28e-59
ANKRD53	ENSG00000144031.11	0.66	4.38	-1.696	2.23e-73
ANKS1A	ENSG00000064999.13	8.43	3.23	1.157	1.26e-36
ANKS4B	ENSG00000175311.6	2.24	0.05	1.626	2.82e-40
ANLN	ENSG00000011426.10	7.22	0.17	2.813	1.83e-65
ANO1	ENSG00000131620.17	50.251	1.53	4.34	2.6e-80
ANO10	ENSG00000160746.12	17.019	4.92	1.606	3.08e-61
ANO6	ENSG00000177119.15	19.211	4.99	1.755	3.38e-48
ANO7	ENSG00000146205.13	1.97	0.43	1.054	1.06e-09
ANOS1	ENSG00000011201.10	2.22	0.07	1.589	1.39e-50
ANP32A	ENSG00000140350.15	97.342	20.74	2.177	2.78e-63
ANP32B	ENSG00000136938.8	122.538	60.559	1.005	6.92e-26
ANP32E	ENSG00000143401.14	19.74	3.1	2.339	2.93e-78
ANPEP	ENSG00000166825.13	38.289	306.469	-2.968	1.94e-30
ANTXR1	ENSG00000169604.19	51.911	1.34	4.499	1.53e-74
ANTXR2	ENSG00000163297.16	44.27	3.62	3.293	5.26e-53
ANXA1	ENSG00000135046.13	250.678	11.12	4.376	4.83e-68
ANXA10	ENSG00000109511.10	55.529	5.31	3.163	1.18e-16
ANXA11	ENSG00000122359.17	270.614	53.319	2.322	2.31e-51
ANXA13	ENSG00000104537.16	5.76	0.08	2.646	5.78e-42
ANXA2	ENSG00000182718.16	1875.94	115.151	4.014	5.78e-66
ANXA2P2	ENSG00000231991.4	30.64	1.17	3.866	1e-82
ANXA2R	ENSG00000177721.4	2.69	0.27	1.539	1.45e-43
ANXA3	ENSG00000138772.12	93.798	13.43	2.716	1.58e-30
ANXA4	ENSG00000196975.14	387.029	125.208	1.62	3.97e-17
ANXA5	ENSG00000164111.14	370.954	69.189	2.406	6.16e-58
ANXA6	ENSG00000197043.13	104.589	28.44	1.843	3.6e-41
ANXA7	ENSG00000138279.15	85.46	21.151	1.965	1.19e-60
ANXA8	ENSG00000265190.6	12.49	0.1	3.616	2.22e-46
ANXA8L1	ENSG00000264230.7	9.11	0.11	3.187	8.74e-43
AOAH	ENSG00000136250.11	5.37	0.67	1.931	9.1e-36
AOC1	ENSG00000002726.19	32.17	0.1	4.914	8.51e-74
AOC3	ENSG00000131471.6	21.44	3.12	2.445	9.94e-43
AOX1	ENSG00000138356.13	3.92	33.721	-2.819	3.08e-39
AP000275.65	ENSG00000265590.9	2.89	0.38	1.495	8.06e-34
AP000349.2	ENSG00000280178.1	63.548	0.01	5.998	1.48e-72
AP000695.4	ENSG00000233818.1	1.77	0	1.47	1.77e-48
AP000695.6	ENSG00000230479.1	1.21	0	1.144	7.52e-49
AP000892.6	ENSG00000280143.1	9.58	2.14	1.753	1.22e-29
AP001258.4	ENSG00000245571.6	3.07	0.88	1.114	1.51e-41
AP001372.2	ENSG00000254837.2	4.15	1.37	1.12	5.32e-47
AP001505.10	ENSG00000276529.1	4.83	1.41	1.274	1e-43
AP002518.1	ENSG00000280653.1	109.273	0	6.785	4.31e-47
AP003391.1	ENSG00000281272.1	8.62	0	3.266	7.66e-15
AP006621.8	ENSG00000255108.1	0.54	11.28	-2.995	2.62e-70
AP1AR	ENSG00000138660.11	9.52	3.01	1.391	8.85e-48
AP1B1	ENSG00000100280.16	40.391	14.58	1.41	2.26e-47
AP1M1	ENSG00000072958.8	30.41	8.21	1.77	6.82e-61
AP1M2	ENSG00000129354.11	78.738	18.25	2.05	7.46e-44
AP1S1	ENSG00000106367.13	59.962	11.44	2.293	2.4e-80
AP1S2	ENSG00000182287.13	11.97	3.11	1.658	2.31e-42
AP1S3	ENSG00000152056.16	10.13	0.74	2.677	8.6e-63
AP2A1	ENSG00000196961.12	50.611	21.61	1.191	1.7e-30
AP2B1	ENSG00000006125.16	65.298	12.59	2.286	1.29e-74
AP2M1	ENSG00000161203.13	245.962	51.631	2.23	8.45e-62
AP2S1	ENSG00000042753.11	121.49	31.291	1.923	2.25e-61
AP3B1	ENSG00000132842.13	29.331	8.65	1.652	1.34e-65
AP3M2	ENSG00000070718.11	10.91	2.38	1.817	4.83e-64
AP3S1	ENSG00000177879.14	58.699	28.369	1.023	6.91e-29
AP4M1	ENSG00000221838.9	17.89	8.3	1.022	5.35e-32
AP4S1	ENSG00000100478.14	4.49	1.52	1.123	2.3e-42
AP5M1	ENSG00000053770.11	10.69	3	1.547	4.24e-56
AP5S1	ENSG00000125843.10	6.53	2.66	1.041	1.75e-46
AP5Z1	ENSG00000242802.6	21.96	9.15	1.178	1.33e-23
APAF1	ENSG00000120868.13	6.32	2.08	1.249	6.41e-47
APBB1	ENSG00000166313.18	18.17	8.32	1.04	5.53e-19
APBB1IP	ENSG00000077420.15	5.57	1.15	1.612	2e-26
APBB2	ENSG00000163697.16	13.04	3.38	1.681	1.52e-48
APCDD1	ENSG00000154856.12	20.26	4.07	2.068	4.01e-41
APCS	ENSG00000132703.3	17.25	1.37	2.945	3.48e-12
APEH	ENSG00000164062.12	75.908	29.941	1.314	8.81e-42
APEX1	ENSG00000100823.11	105.448	43.57	1.256	2.61e-35
APEX2	ENSG00000169188.4	13.93	2.77	1.986	9.01e-83
APH1A	ENSG00000117362.12	143.101	37.551	1.902	8.51e-58
APH1B	ENSG00000138613.13	9.41	1.67	1.963	1.13e-67
API5	ENSG00000166181.12	29.349	12.92	1.125	3.31e-42
APIP	ENSG00000149089.12	18.77	8.87	1.002	3.37e-29
APITD1	ENSG00000175279.21	13.7	5.88	1.095	1.59e-42
APLNR	ENSG00000134817.10	11.99	0.46	3.153	2.36e-55
APLP2	ENSG00000084234.16	251.409	38.321	2.682	1.52e-68
APMAP	ENSG00000101474.11	59.288	16.88	1.754	2.37e-64
APOA1BP	ENSG00000163382.11	80.559	26.9	1.548	9.74e-55
APOBEC1	ENSG00000111701.6	3.1	0	2.036	1.01e-27
APOBEC3B	ENSG00000179750.15	4.54	0.92	1.529	5.37e-30
APOBEC3C	ENSG00000244509.3	20.05	1.8	2.91	5.72e-68
APOBEC3D	ENSG00000243811.7	3.13	0.26	1.713	1.26e-60
APOBEC3F	ENSG00000128394.16	5.09	0.8	1.758	1.05e-74
APOBEC3G	ENSG00000239713.7	10.56	0.91	2.598	5.73e-67
APOBR	ENSG00000184730.10	6.16	0.38	2.375	1.78e-55
APOC1	ENSG00000130208.9	213.53	3.58	5.55	1.97e-61
APOC2	ENSG00000234906.8	6.95	0.16	2.777	2.27e-44
APOC4-APOC2	ENSG00000224916.8	10.69	0.36	3.104	2.98e-44
APOD	ENSG00000189058.8	238.029	63.508	1.89	3.39e-13
APOE	ENSG00000130203.9	220.295	10.01	4.329	5.85e-52
APOL1	ENSG00000100342.20	135.447	2.76	5.181	2.11e-88
APOL2	ENSG00000128335.13	41.81	6.06	2.6	4.35e-67
APOL3	ENSG00000128284.19	20.141	3.66	2.182	5.32e-44
APOL4	ENSG00000100336.17	4.44	0.46	1.898	3e-37
APOL6	ENSG00000221963.5	8.2	0.8	2.354	7.08e-70
APOLD1	ENSG00000178878.12	8.16	2.15	1.54	3.84e-33
APOO	ENSG00000184831.13	14.42	4.6	1.461	5.76e-59
APP	ENSG00000142192.20	327.079	65.321	2.307	4.08e-59
APRT	ENSG00000198931.10	150.904	68.441	1.129	1.22e-23
APTR	ENSG00000214293.8	18.731	8.76	1.015	6.7e-25
AQP12A	ENSG00000184945.13	0.46	69.18	-5.587	2.01e-78
AQP12B	ENSG00000185176.12	0.31	161.791	-6.957	1.12e-87
AQP3	ENSG00000165272.14	35.019	16.19	1.067	3.41e-16
AQP5	ENSG00000161798.6	37.281	0.48	4.693	3.32e-46
AQP8	ENSG00000103375.10	0.36	173.488	-7.003	3e-58
AQP9	ENSG00000103569.9	2.25	0.13	1.524	7.74e-27
AQR	ENSG00000021776.10	14	5.22	1.27	3.37e-44
ARAP1	ENSG00000186635.14	57.719	19.401	1.525	6.3e-38
ARAP1-AS1	ENSG00000256007.1	13.92	0	3.899	2e-41
ARAP2	ENSG00000047365.11	5.48	2.01	1.106	3.78e-26
ARAP3	ENSG00000120318.15	8.04	1.61	1.792	2.72e-50
ARCN1	ENSG00000095139.13	88.628	39.27	1.154	1.15e-37
AREG	ENSG00000109321.10	22.259	0.6	3.862	1.08e-60
ARF1	ENSG00000143761.13	379.432	127.318	1.568	7.06e-40
ARF3	ENSG00000134287.9	69.84	14.39	2.203	1.09e-71
ARF4	ENSG00000168374.10	199.534	53.212	1.887	2.2e-49
ARF5	ENSG00000004059.10	190.427	77.123	1.293	1.51e-34
ARF6	ENSG00000165527.6	48	6.32	2.743	2.93e-85
ARFGEF1	ENSG00000066777.8	23.831	10.03	1.171	3.33e-36
ARFIP1	ENSG00000164144.14	21.48	4	2.169	3.39e-78
ARFRP1	ENSG00000101246.19	45.301	11.27	1.916	1.06e-55
ARG2	ENSG00000081181.7	3	0.97	1.022	8.3e-22
ARHGAP1	ENSG00000175220.11	67.409	14.13	2.177	1.18e-63
ARHGAP11A	ENSG00000198826.10	2.98	0.92	1.052	2.75e-32
ARHGAP12	ENSG00000165322.17	22.579	9.81	1.125	3.79e-30
ARHGAP15	ENSG00000075884.12	6.06	0.52	2.216	9.58e-46
ARHGAP17	ENSG00000140750.16	30.619	12.55	1.223	3.71e-34
ARHGAP21	ENSG00000107863.16	21.259	6.92	1.491	2.42e-35
ARHGAP22	ENSG00000128805.14	3.56	0.89	1.271	6.62e-34
ARHGAP23	ENSG00000275832.4	13.16	1.42	2.549	7.71e-54
ARHGAP25	ENSG00000163219.11	6.29	0.8	2.018	1.12e-46
ARHGAP26	ENSG00000145819.15	13.51	1.61	2.475	1.45e-55
ARHGAP27	ENSG00000159314.11	31.871	4.13	2.68	5.22e-48
ARHGAP30	ENSG00000186517.13	7.66	0.77	2.291	5.61e-47
ARHGAP31	ENSG00000031081.10	3.8	0.7	1.498	3.72e-49
ARHGAP35	ENSG00000160007.17	11.17	4.38	1.178	4.84e-38
ARHGAP4	ENSG00000089820.15	18.8	4.82	1.766	1.07e-25
ARHGAP42	ENSG00000165895.17	3.48	0.27	1.819	2.67e-60
ARHGAP5	ENSG00000100852.12	19.751	4.99	1.793	1.19e-51
ARHGAP5-AS1	ENSG00000258655.2	3.41	0.8	1.293	3.52e-54
ARHGAP6	ENSG00000047648.21	2.52	0.67	1.076	1.97e-26
ARHGAP9	ENSG00000123329.17	11.18	2.18	1.937	2.54e-26
ARHGDIA	ENSG00000141522.11	241.988	77.761	1.625	3.92e-38
ARHGDIB	ENSG00000111348.8	162.883	10.77	3.799	8.34e-71
ARHGDIG	ENSG00000242173.8	1.4	51.239	-4.444	1.34e-78
ARHGEF1	ENSG00000076928.17	70.898	30.439	1.193	2.94e-20
ARHGEF10	ENSG00000104728.15	7.94	3.17	1.1	2.54e-27
ARHGEF12	ENSG00000196914.8	25.09	8.4	1.473	9.79e-39
ARHGEF16	ENSG00000130762.14	24.501	6.1	1.845	5.26e-33
ARHGEF17	ENSG00000110237.3	14.65	6.81	1.003	3.27e-17
ARHGEF18	ENSG00000104880.17	23.33	7.56	1.507	8.14e-41
ARHGEF2	ENSG00000116584.17	43.501	5.49	2.778	7.81e-65
ARHGEF25	ENSG00000240771.6	13.74	4.06	1.543	8.22e-32
ARHGEF35	ENSG00000213214.4	10.93	2.09	1.949	7.1e-34
ARHGEF4	ENSG00000136002.16	4.75	13.31	-1.315	1.35e-20
ARHGEF5	ENSG00000050327.14	15.72	6.13	1.23	1.12e-27
ARHGEF6	ENSG00000129675.15	4.61	1.1	1.418	2.28e-32
ARHGEF9	ENSG00000131089.13	9.21	2.56	1.52	2.51e-62
ARID1B	ENSG00000049618.21	12.41	5.45	1.056	9.26e-32
ARID5A	ENSG00000196843.15	16.91	3.8	1.9	2.58e-38
ARID5B	ENSG00000150347.14	8.27	1.04	2.184	1.22e-56
ARIH1	ENSG00000166233.12	31.91	12.18	1.32	4.11e-37
ARL1	ENSG00000120805.13	41.08	15.77	1.327	2.15e-46
ARL13B	ENSG00000169379.15	4.22	1.05	1.348	1.7e-55
ARL14	ENSG00000179674.3	21.681	2.59	2.659	1.79e-26
ARL14EP	ENSG00000152219.4	10.97	4.62	1.091	1.14e-43
ARL15	ENSG00000185305.10	11.76	1.83	2.173	2.81e-73
ARL17B	ENSG00000228696.8	3.22	1.05	1.042	3.86e-41
ARL2	ENSG00000213465.7	95.982	29.04	1.691	1.07e-51
ARL2BP	ENSG00000102931.7	35.05	8.78	1.882	2.43e-69
ARL3	ENSG00000138175.8	8.48	2.23	1.553	5.69e-67
ARL4A	ENSG00000122644.12	21.651	2.55	2.674	5.22e-83
ARL4C	ENSG00000188042.7	34.539	1.67	3.735	1.67e-68
ARL4D	ENSG00000175906.4	7.1	0.77	2.194	7.72e-49
ARL5A	ENSG00000162980.16	12.93	4.46	1.351	2.21e-47
ARL6IP1	ENSG00000170540.14	140.088	17.55	2.927	7.75e-75
ARL6IP5	ENSG00000144746.6	100.412	16.99	2.495	1.94e-68
ARL6IP6	ENSG00000177917.10	12.1	3.22	1.634	2.17e-46
ARL8A	ENSG00000143862.7	47.29	10.71	2.044	3.52e-71
ARL8B	ENSG00000134108.12	36.559	11.47	1.591	1.71e-54
ARMC1	ENSG00000104442.9	11.44	3.7	1.404	5.03e-54
ARMC10	ENSG00000170632.13	29.66	10.7	1.39	1.58e-44
ARMC6	ENSG00000105676.13	15.51	3.65	1.828	4.68e-68
ARMC7	ENSG00000125449.6	12.07	2.46	1.917	1.16e-77
ARMC8	ENSG00000114098.17	14.94	5.86	1.216	9.45e-40
ARMC9	ENSG00000135931.17	10.14	1.77	2.008	5.79e-63
ARMCX6	ENSG00000198960.10	38.719	17.82	1.078	3.63e-35
ARMT1	ENSG00000146476.10	9.32	2.14	1.717	9.8e-66
ARNTL2	ENSG00000029153.14	7.62	0.41	2.612	8.89e-70
ARPC1A	ENSG00000241685.8	112.836	27.701	1.988	5.31e-61
ARPC1B	ENSG00000130429.12	304.584	24.8	3.566	1.92e-78
ARPC2	ENSG00000163466.15	286.799	41.24	2.768	1.22e-72
ARPC3	ENSG00000111229.15	328.829	67.111	2.276	1.68e-61
ARPC4	ENSG00000241553.12	132.43	26.67	2.27	3.23e-64
ARPC4-TTLL3	ENSG00000250151.9	6.36	2.52	1.064	1.96e-25
ARPC5	ENSG00000162704.15	155.664	21.091	2.826	7.95e-80
ARPC5L	ENSG00000136950.13	48.431	10.86	2.059	1.73e-70
ARPP19	ENSG00000128989.10	32.28	8.95	1.742	2.07e-59
ARRB2	ENSG00000141480.17	34.071	9.17	1.786	1.4e-36
ARRDC1	ENSG00000197070.13	66.578	28.01	1.22	1.78e-21
ARRDC2	ENSG00000105643.9	38.869	6.99	2.319	1.76e-55
ARRDC3	ENSG00000113369.8	25.52	6.9	1.747	6.03e-29
ARSB	ENSG00000113273.15	4.31	1.63	1.014	1.07e-35
ARSI	ENSG00000183876.8	2.29	0.09	1.594	9.53e-44
ARV1	ENSG00000173409.13	15.911	6.86	1.105	6.56e-41
ASAH1	ENSG00000104763.17	92.25	21.69	2.039	3.73e-63
ASAP1	ENSG00000153317.14	12.33	3.06	1.715	5.44e-45
ASAP2	ENSG00000151693.9	14.5	1.93	2.403	1.22e-51
ASB1	ENSG00000065802.11	13.11	3.63	1.608	2.65e-58
ASB13	ENSG00000196372.12	17.66	6	1.415	5.41e-39
ASB6	ENSG00000148331.11	12.68	5.65	1.041	2.82e-37
ASB7	ENSG00000183475.12	4	1.06	1.279	2.5e-68
ASCC1	ENSG00000138303.17	17.99	8.11	1.06	4.76e-20
ASCC2	ENSG00000100325.14	37.951	16.2	1.179	3.95e-38
ASCC3	ENSG00000112249.13	10.31	3.9	1.207	8.78e-42
ASF1A	ENSG00000111875.7	6.63	2.79	1.009	3.99e-41
ASF1B	ENSG00000105011.8	7.33	0.22	2.771	1.34e-82
ASGR1	ENSG00000141505.11	1.99	0.29	1.213	5.83e-34
ASH2L	ENSG00000129691.15	20.01	8.08	1.21	4.26e-49
ASL	ENSG00000126522.16	50.579	19.01	1.366	1.08e-33
ASMTL	ENSG00000169093.14	20.51	9.59	1.022	4.23e-17
ASNA1	ENSG00000198356.11	60.371	20.659	1.503	8e-57
ASNSD1	ENSG00000138381.9	19.53	6.46	1.46	1.55e-60
ASPH	ENSG00000198363.15	75.462	12.14	2.541	4.6e-58
ASPHD1	ENSG00000174939.10	21.739	3.93	2.206	1.26e-45
ASPHD2	ENSG00000128203.6	5.25	0.2	2.381	6.18e-69
ASPM	ENSG00000066279.16	2.3	0.04	1.666	6.89e-60
ASPN	ENSG00000106819.11	38.361	1.25	4.129	2.62e-64
ASS1	ENSG00000130707.17	163.369	19.329	3.015	9.02e-62
ASUN	ENSG00000064102.14	13.25	4.82	1.292	1.64e-48
ASXL2	ENSG00000143970.16	4.51	1.42	1.187	2.25e-43
ATAD1	ENSG00000138138.13	18.191	5	1.677	5.2e-67
ATAD2	ENSG00000156802.12	4.54	0.87	1.567	1.48e-55
ATE1	ENSG00000107669.17	7.41	2.06	1.459	1.34e-55
ATF1	ENSG00000123268.8	13.65	3.79	1.613	5.21e-56
ATF2	ENSG00000115966.16	14.46	5.09	1.344	8.93e-49
ATF3	ENSG00000162772.16	24.86	11.91	1.002	1.24e-06
ATF5	ENSG00000169136.8	23.079	7.6	1.485	2.04e-36
ATF6B	ENSG00000213676.10	55.039	24.06	1.161	6.83e-33
ATF7	ENSG00000170653.18	15.92	6.35	1.203	6.98e-39
ATF7IP	ENSG00000171681.12	9.54	3.31	1.29	2.5e-44
ATG101	ENSG00000123395.14	41.46	11.23	1.796	6.66e-69
ATG16L1	ENSG00000085978.21	15.99	5	1.502	4.53e-52
ATG3	ENSG00000144848.10	33.95	14.11	1.21	6.13e-44
ATG5	ENSG00000057663.12	13.61	4.65	1.371	1.8e-59
ATG7	ENSG00000197548.12	15.74	4.03	1.735	6.06e-64
ATG9A	ENSG00000198925.10	28.959	12.12	1.191	6.54e-40
ATG9B	ENSG00000181652.18	3.26	0.24	1.781	1.93e-41
ATHL1	ENSG00000142102.15	34.21	374.831	-3.416	2.49e-36
ATIC	ENSG00000138363.14	85.822	27.94	1.585	2.01e-43
ATL2	ENSG00000119787.13	18.22	7.89	1.112	1.21e-27
ATL3	ENSG00000184743.12	17.701	5.58	1.507	4.56e-44
ATMIN	ENSG00000166454.9	14.87	6.19	1.142	5.84e-48
ATOX1	ENSG00000177556.11	131.936	19.849	2.673	3.86e-83
ATP10A	ENSG00000206190.11	3.58	0.17	1.969	4.62e-23
ATP10B	ENSG00000118322.12	5.53	0.91	1.773	1.01e-16
ATP10D	ENSG00000145246.13	6.49	2.37	1.152	1.28e-33
ATP11A	ENSG00000068650.18	15.02	6.08	1.178	1.56e-21
ATP11B	ENSG00000058063.15	15.67	4.59	1.576	1.55e-45
ATP11C	ENSG00000101974.14	5.99	1.84	1.299	3.25e-39
ATP13A3	ENSG00000133657.14	26.57	6.59	1.861	2.78e-50
ATP1A1	ENSG00000163399.15	445.103	177.773	1.319	5.91e-27
ATP1B1	ENSG00000143153.12	244.043	37.61	2.666	4e-58
ATP1B3	ENSG00000069849.10	101.863	14.61	2.72	1.87e-64
ATP2A2	ENSG00000174437.16	83.719	21.151	1.935	3.36e-52
ATP2B1	ENSG00000070961.14	11.55	3.98	1.333	1.49e-40
ATP2B4	ENSG00000058668.14	33.19	5.52	2.391	6.63e-51
ATP2C1	ENSG00000017260.19	53.578	12.01	2.069	2.55e-62
ATP2C2	ENSG00000064270.12	8.62	0.51	2.672	3.99e-45
ATP4A	ENSG00000105675.8	0.01	3.18	-2.049	1.46e-38
ATP5B	ENSG00000110955.8	349.633	126.377	1.461	4.18e-39
ATP5C1	ENSG00000165629.19	209.847	89.921	1.214	7.25e-27
ATP5E	ENSG00000124172.9	121.548	16.57	2.802	1.91e-77
ATP5F1	ENSG00000116459.10	164.665	63.381	1.364	1.22e-39
ATP5G1	ENSG00000159199.13	139.942	42.051	1.711	4.48e-51
ATP5G2	ENSG00000135390.17	504.6	225.814	1.156	1.21e-27
ATP5G3	ENSG00000154518.9	203.092	50.112	1.998	1.98e-59
ATP5H	ENSG00000167863.11	262.158	87.869	1.566	3.83e-45
ATP5I	ENSG00000169020.9	407.088	129.813	1.641	2.8e-39
ATP5J	ENSG00000154723.12	146.676	58.08	1.322	1.57e-41
ATP5J2	ENSG00000241468.7	469.993	104.343	2.161	4.32e-62
ATP5J2-PTCD1	ENSG00000248919.7	3.95	0.87	1.404	3.88e-64
ATP5L	ENSG00000167283.7	330.429	72.458	2.174	1.92e-68
ATP5O	ENSG00000241837.6	164.722	63.092	1.371	2.08e-39
ATP6AP1	ENSG00000071553.16	107.723	27.08	1.953	4.46e-67
ATP6AP2	ENSG00000182220.13	91.569	13.11	2.714	2.96e-86
ATP6V0A1	ENSG00000033627.14	35.891	12.17	1.486	8.78e-39
ATP6V0B	ENSG00000117410.13	163.675	69.218	1.23	2.34e-31
ATP6V0C	ENSG00000185883.10	197.334	55.1	1.822	3.98e-48
ATP6V0D1	ENSG00000159720.11	90.471	20.75	2.072	2.83e-68
ATP6V0E1	ENSG00000113732.8	302.082	66.491	2.167	1.23e-64
ATP6V0E2	ENSG00000171130.17	21.681	7.84	1.359	4.41e-26
ATP6V1A	ENSG00000114573.9	18.52	5.22	1.65	6.39e-62
ATP6V1B2	ENSG00000147416.10	43.48	14.57	1.514	7.09e-44
ATP6V1C1	ENSG00000155097.11	19.92	6.51	1.478	1.19e-49
ATP6V1D	ENSG00000100554.11	76.531	13.45	2.424	2.17e-81
ATP6V1E1	ENSG00000131100.12	108.007	22.59	2.208	6.93e-72
ATP6V1F	ENSG00000128524.4	197.17	33.261	2.532	1.03e-75
ATP6V1G1	ENSG00000136888.6	120.3	26.541	2.139	6.17e-68
ATP6V1H	ENSG00000047249.16	36.75	9.15	1.895	1.06e-67
ATP8B2	ENSG00000143515.16	11.55	3.38	1.519	1.14e-34
ATP9A	ENSG00000054793.13	20.7	4.63	1.946	3.34e-57
ATPAF2	ENSG00000171953.15	14.62	6.41	1.076	1.19e-36
ATPIF1	ENSG00000130770.17	214.553	58.5	1.857	1.46e-49
ATRAID	ENSG00000138085.16	132.853	46.401	1.498	8e-53
ATXN1	ENSG00000124788.17	8.07	2.32	1.45	3.25e-46
ATXN10	ENSG00000130638.15	65.83	24.739	1.377	1.92e-46
ATXN1L	ENSG00000224470.7	8.34	3.64	1.009	4.89e-33
ATXN2	ENSG00000204842.14	20.24	9.39	1.032	6.4e-31
ATXN3	ENSG00000066427.21	11.43	4.05	1.299	5.99e-41
ATXN7L1	ENSG00000146776.14	4.16	1.3	1.166	4.81e-47
ATXN7L3	ENSG00000087152.15	27.62	9.07	1.507	1.34e-52
ATXN7L3B	ENSG00000253719.3	17.37	6.55	1.283	8.84e-49
AURKA	ENSG00000087586.17	6.36	0.43	2.364	5.81e-70
AURKAIP1	ENSG00000175756.13	109.189	45.819	1.235	1.13e-31
AURKB	ENSG00000178999.12	7.44	0.25	2.755	1.76e-69
AVL9	ENSG00000105778.17	14.58	4.32	1.55	1.86e-53
AVPI1	ENSG00000119986.6	16.59	3.35	2.016	5.45e-57
AXIN1	ENSG00000103126.14	17.111	5.34	1.514	9.84e-55
AXIN2	ENSG00000168646.12	6.06	1.54	1.475	5.99e-37
AXL	ENSG00000167601.11	21.01	1.47	3.156	8.93e-63
AZGP1	ENSG00000160862.12	54.36	240.55	-2.125	3.02e-27
AZIN2	ENSG00000142920.16	6.06	1.02	1.805	1.22e-59
B2M	ENSG00000166710.17	8387.35	568.217	3.881	1.69e-64
B3GALNT1	ENSG00000169255.13	6.65	1.76	1.471	1.33e-50
B3GALT4	ENSG00000235863.3	13.73	1.42	2.606	7.81e-85
B3GALT5	ENSG00000183778.17	6.52	0.97	1.933	2.1e-36
B3GALT6	ENSG00000176022.4	11.46	4.42	1.201	7.4e-45
B3GAT3	ENSG00000149541.9	37.901	12.83	1.492	1.75e-42
B3GLCT	ENSG00000187676.7	3.2	1.06	1.028	2.74e-54
B3GNT2	ENSG00000170340.10	16.87	6.17	1.318	7.48e-34
B3GNT3	ENSG00000179913.10	50.92	1.11	4.621	1.58e-83
B3GNT5	ENSG00000176597.11	11.38	1.5	2.308	2.4e-61
B3GNT6	ENSG00000198488.10	1.05	0	1.036	2.22e-17
B3GNT7	ENSG00000156966.6	16.67	4.56	1.668	1.28e-18
B3GNT8	ENSG00000177191.2	4.47	0.63	1.747	2.15e-54
B3GNT9	ENSG00000237172.3	9.33	1.14	2.271	6.13e-76
B3GNTL1	ENSG00000175711.8	6.48	2.12	1.262	8.47e-50
B4GALNT1	ENSG00000135454.13	2	0.26	1.252	2.19e-46
B4GALNT3	ENSG00000139044.10	17.65	1.69	2.794	9.68e-60
B4GALT1	ENSG00000086062.12	59.449	12.15	2.201	5.88e-40
B4GALT4	ENSG00000121578.12	35.76	7.01	2.198	1.43e-70
B4GALT5	ENSG00000158470.5	33.92	3.49	2.959	3.12e-75
B9D2	ENSG00000123810.7	7.74	1.85	1.617	2.08e-61
BABAM1	ENSG00000105393.15	61.84	22.33	1.429	2.13e-52
BACE1	ENSG00000186318.16	16.03	45.972	-1.464	9.55e-25
BACE2	ENSG00000182240.15	99.27	20.3	2.235	4.89e-30
BACH1	ENSG00000156273.15	11.2	3.48	1.445	8e-39
BAD	ENSG00000002330.13	68.902	20.16	1.724	3.12e-49
BAG1	ENSG00000107262.16	71.689	28.369	1.307	4.92e-30
BAG2	ENSG00000112208.11	2.29	0.47	1.162	4.22e-34
BAG3	ENSG00000151929.9	33.15	6.45	2.197	3.31e-53
BAG4	ENSG00000156735.10	5.53	1.39	1.45	4.13e-61
BAG5	ENSG00000166170.9	13.46	2.9	1.89	8.97e-82
BAG6	ENSG00000204463.12	146.686	59.251	1.293	3.04e-32
BAIAP2	ENSG00000175866.15	38.561	4.24	2.916	6.65e-82
BAIAP2-AS1	ENSG00000226137.5	6.92	1.41	1.716	1.72e-72
BAIAP2L1	ENSG00000006453.13	39.601	12.16	1.625	1.2e-27
BAIAP2L2	ENSG00000128298.16	19.2	0.82	3.472	6.14e-51
BAK1	ENSG00000030110.12	25.43	4.5	2.265	5.97e-68
BAMBI	ENSG00000095739.10	10.3	1.79	2.018	1.5e-52
BANF1	ENSG00000175334.7	169.965	46.629	1.844	1.35e-54
BANF2	ENSG00000125888.14	0	1.42	-1.275	5.96e-37
BANK1	ENSG00000153064.11	3.48	0.23	1.865	1.59e-43
BANP	ENSG00000172530.19	9.68	4.31	1.008	6.84e-25
BARX2	ENSG00000043039.6	8.53	1.91	1.711	9.65e-27
BASP1	ENSG00000176788.8	23.96	0.92	3.7	4.81e-66
BATF	ENSG00000156127.6	17.99	0.36	3.804	1.14e-74
BATF3	ENSG00000123685.8	4.59	0.53	1.869	1.34e-50
BAX	ENSG00000087088.19	132.439	21.13	2.592	1.33e-72
BAZ1A	ENSG00000198604.10	16.47	4.53	1.66	1.49e-42
BAZ1B	ENSG00000009954.10	20.45	5.94	1.628	3.86e-62
BBC3	ENSG00000105327.15	11.67	4.31	1.255	7.14e-18
BBS12	ENSG00000181004.9	2.52	0.51	1.221	6.84e-64
BBS2	ENSG00000125124.11	21.9	8.8	1.224	1.65e-39
BBS7	ENSG00000138686.9	6.18	1.77	1.374	2.78e-61
BBS9	ENSG00000122507.20	6.03	1.5	1.492	1.2e-55
BBX	ENSG00000114439.18	11.5	2.72	1.749	9.44e-53
BCAP29	ENSG00000075790.10	28.65	7.93	1.731	1.46e-61
BCAP31	ENSG00000185825.15	227.039	58.12	1.948	1.28e-61
BCAR1	ENSG00000050820.16	59.071	16.68	1.765	3.62e-40
BCAR3	ENSG00000137936.16	15.3	1.57	2.665	5.18e-79
BCAS1	ENSG00000064787.12	21.31	0.25	4.158	2.92e-60
BCAS2	ENSG00000116752.5	27.739	8.62	1.579	8.59e-57
BCAS3	ENSG00000141376.20	9.98	3.3	1.352	2.68e-56
BCAS4	ENSG00000124243.17	6.92	0.62	2.29	4.63e-70
BCAT1	ENSG00000060982.14	4.67	11.25	-1.111	9.25e-15
BCCIP	ENSG00000107949.16	36.39	15.08	1.217	6.57e-50
BCKDHA	ENSG00000248098.10	24.23	11.53	1.01	9.36e-29
BCL10	ENSG00000142867.12	13.92	1.81	2.409	4.75e-70
BCL11B	ENSG00000127152.17	1.31	0.04	1.151	1.47e-44
BCL2A1	ENSG00000140379.7	8.61	0.23	2.966	3.37e-50
BCL2L1	ENSG00000171552.12	116.129	18.88	2.559	2.68e-67
BCL2L11	ENSG00000153094.21	8.19	3.33	1.086	6.28e-34
BCL2L12	ENSG00000126453.9	18.26	7.15	1.241	2.11e-23
BCL2L13	ENSG00000099968.17	21.75	9.07	1.176	1.06e-42
BCL2L15	ENSG00000188761.11	31.23	7.11	1.991	4.39e-19
BCL3	ENSG00000069399.12	55.36	19.889	1.432	5.51e-15
BCL6B	ENSG00000161940.10	5.73	0.86	1.855	7.54e-47
BCL7B	ENSG00000106635.7	47.771	12.63	1.839	5.88e-70
BCL7C	ENSG00000099385.11	31.851	6.18	2.194	6.04e-72
BCL9	ENSG00000116128.9	7.76	2.35	1.387	1.43e-47
BCL9L	ENSG00000186174.12	23.61	9.31	1.255	5.78e-21
BCO1	ENSG00000135697.9	1.51	0.04	1.271	4.77e-53
BCOR	ENSG00000183337.16	10.67	4.7	1.034	1.9e-32
BCORL1	ENSG00000085185.15	4.27	1.47	1.093	3.34e-46
BCR	ENSG00000186716.19	42.83	7.89	2.302	8.53e-75
BDH1	ENSG00000161267.11	14.29	4.32	1.523	3.6e-37
BDH2	ENSG00000164039.14	39.409	12.67	1.564	1.74e-32
BDKRB2	ENSG00000168398.6	7.93	1.9	1.623	4.21e-47
BEAN1	ENSG00000166546.13	4	0.29	1.955	9.63e-44
BECN1	ENSG00000126581.12	58.149	16.44	1.762	1.03e-63
BEGAIN	ENSG00000183092.15	1.17	11.54	-2.531	1.3e-65
BEND6	ENSG00000151917.17	1.31	0.07	1.11	2.64e-42
BEX4	ENSG00000102409.9	23.209	9.22	1.244	1.25e-22
BFAR	ENSG00000103429.10	47.28	20.9	1.141	9.44e-28
BGN	ENSG00000182492.15	613.066	22.19	4.727	9.67e-72
BHLHA15	ENSG00000180535.3	0.81	117.051	-6.027	8.88e-79
BHLHE40	ENSG00000134107.4	141.778	18.84	2.847	5.27e-39
BHLHE41	ENSG00000123095.5	20.11	2.34	2.66	9.94e-59
BICD1	ENSG00000151746.13	8.87	0.78	2.471	3.26e-77
BICD2	ENSG00000185963.13	9.46	2.63	1.527	4.17e-49
BID	ENSG00000015475.18	33.15	3.43	2.947	1.17e-65
BIK	ENSG00000100290.2	22.36	0.78	3.714	9.88e-74
BIN1	ENSG00000136717.14	32.529	8.91	1.758	7.96e-54
BIN2	ENSG00000110934.10	4.86	0.56	1.909	9.64e-37
BIN3	ENSG00000147439.11	26.359	6.92	1.788	2.09e-56
BIRC3	ENSG00000023445.13	30.099	2.44	3.176	1.57e-46
BIRC5	ENSG00000089685.14	6.61	0.25	2.606	6.77e-46
BIRC7	ENSG00000101197.12	1.68	0	1.422	8.27e-29
BLACAT1	ENSG00000281406.1	3.59	0.05	2.128	6.36e-45
BLCAP	ENSG00000166619.12	54.59	10.89	2.225	1.33e-72
BLM	ENSG00000197299.10	2.44	0.23	1.484	2.33e-64
BLNK	ENSG00000095585.16	12.55	5.71	1.014	5.58e-09
BLOC1S1	ENSG00000135441.7	178.106	41.749	2.067	2.52e-67
BLOC1S2	ENSG00000196072.11	34.46	9.76	1.721	2.58e-61
BLOC1S3	ENSG00000189114.6	8.16	2.25	1.495	1.47e-70
BLOC1S4	ENSG00000186222.4	12.29	2.91	1.765	1.71e-70
BLOC1S5	ENSG00000188428.16	5.7	1.68	1.322	1.18e-61
BLOC1S6	ENSG00000104164.10	15.8	6.97	1.076	5.19e-34
BLVRA	ENSG00000106605.10	44.829	8.77	2.23	1.12e-71
BLVRB	ENSG00000090013.9	100.537	28.14	1.801	1.52e-45
BLZF1	ENSG00000117475.13	12.13	2.92	1.744	4.36e-60
BMF	ENSG00000104081.13	8.08	2.73	1.284	2.92e-27
BMI1	ENSG00000168283.13	22.63	9.16	1.218	2.87e-31
BMP1	ENSG00000168487.17	24.21	4.78	2.125	1.04e-47
BMP2	ENSG00000125845.6	8.74	1.64	1.883	2.35e-49
BMP2K	ENSG00000138756.17	7.49	2.29	1.368	8.14e-44
BMP4	ENSG00000125378.15	26.339	1.22	3.622	2.34e-62
BMP7	ENSG00000101144.12	2.48	0.11	1.649	5.32e-27
BMPR2	ENSG00000204217.12	12.48	1.84	2.247	4.2e-74
BMS1	ENSG00000165733.7	8.85	3.25	1.213	3.2e-64
BNC2	ENSG00000173068.17	1.53	0.17	1.113	5.42e-37
BNIP3	ENSG00000176171.11	12.03	128.871	-3.317	3.05e-45
BNIP3L	ENSG00000104765.14	36.839	6.17	2.4	2.46e-70
BOC	ENSG00000144857.14	14.51	5.27	1.307	3.43e-20
BOK	ENSG00000176720.4	24.729	8.58	1.425	2.31e-32
BOLA2	ENSG00000183336.7	14.89	2.22	2.303	2.01e-63
BOLA2B	ENSG00000169627.7	109.008	15.75	2.715	1.09e-76
BOLA3	ENSG00000163170.11	30.25	12.75	1.184	1.76e-40
BORA	ENSG00000136122.15	3.07	0.71	1.251	1.15e-56
BPGM	ENSG00000172331.11	15.82	2.89	2.112	6.56e-80
BPHL	ENSG00000137274.12	15.99	7.38	1.02	5.9e-32
BPI	ENSG00000101425.12	1.3	0.04	1.145	4.74e-40
BPIFB1	ENSG00000125999.10	3.52	0.01	2.162	4.26e-21
BPNT1	ENSG00000162813.17	21.17	2.84	2.529	3.33e-84
BPTF	ENSG00000171634.16	21.4	9.59	1.081	1.56e-31
BRAP	ENSG00000089234.15	8.1	2.58	1.346	1.86e-63
BRAT1	ENSG00000106009.15	21.67	10.33	1.001	3.77e-24
BRCA1	ENSG00000012048.19	3.13	0.66	1.315	2.77e-51
BRCC3	ENSG00000185515.14	11.65	3.12	1.618	9.88e-69
BRD3	ENSG00000169925.16	11.38	3.83	1.358	1.06e-45
BRD7	ENSG00000166164.15	45.841	17.68	1.326	1.23e-51
BRE	ENSG00000158019.20	28.64	8.31	1.671	7.57e-59
BRF2	ENSG00000104221.12	10.65	3.1	1.507	1.08e-65
BRI3	ENSG00000164713.9	210.473	97.038	1.109	2.38e-25
BRI3BP	ENSG00000184992.10	5.68	1.59	1.367	1.1e-53
BRIX1	ENSG00000113460.12	22.38	4.92	1.982	4.16e-76
BRK1	ENSG00000254999.3	150.278	42.89	1.785	2.47e-57
BRMS1	ENSG00000174744.13	44.399	16.66	1.362	6.45e-46
BROX	ENSG00000162819.11	19.3	4.19	1.968	3.43e-71
BRPF1	ENSG00000156983.15	8.2	3.43	1.054	3.56e-41
BRSK2	ENSG00000174672.15	1.13	47.851	-4.519	1.9e-82
BSCL2	ENSG00000168000.14	77.772	23.07	1.71	9.8e-44
BSG	ENSG00000172270.18	499.208	106.122	2.223	2.33e-60
BST1	ENSG00000109743.10	8.69	0.48	2.711	1.03e-48
BST2	ENSG00000130303.12	184.055	8.16	4.337	1.14e-67
BTBD1	ENSG00000064726.9	23.659	5.92	1.833	1.79e-66
BTBD10	ENSG00000148925.10	18.09	3.46	2.098	2.23e-75
BTBD16	ENSG00000138152.8	1.21	0.07	1.046	2.48e-31
BTBD19	ENSG00000222009.8	4.81	1.45	1.246	8.44e-31
BTBD6	ENSG00000184887.13	23.45	4.65	2.114	1.05e-40
BTBD7	ENSG00000011114.14	7.89	3.37	1.025	7.54e-36
BTBD9	ENSG00000183826.16	3.41	1.04	1.112	1.37e-57
BTF3	ENSG00000145741.15	572.844	227.827	1.326	4.03e-29
BTF3L4	ENSG00000134717.17	30.64	13.44	1.132	1.84e-37
BTF3L4P2	ENSG00000213189.5	30.811	14.59	1.029	7.52e-29
BTG1	ENSG00000133639.4	65.38	28.551	1.168	1.46e-21
BTG2	ENSG00000159388.5	46.782	134.568	-1.504	3.02e-15
BTG3	ENSG00000154640.14	23.75	7.75	1.5	8.92e-43
BTK	ENSG00000010671.15	4.83	0.62	1.847	7.58e-30
BTN2A1	ENSG00000112763.15	15.44	4.27	1.641	1.52e-52
BTN2A2	ENSG00000124508.16	6.77	2.09	1.33	8.33e-34
BTN3A1	ENSG00000026950.16	16.32	6.64	1.181	4.4e-23
BTN3A2	ENSG00000186470.13	20.12	4.35	1.981	3.01e-39
BTN3A3	ENSG00000111801.15	12.33	2.22	2.05	1.68e-27
BTNL8	ENSG00000113303.11	2.34	0.29	1.372	7.25e-21
BTNL9	ENSG00000165810.16	3.09	8.32	-1.188	1.66e-19
BUB1	ENSG00000169679.14	3.74	0.08	2.134	6.57e-69
BUB1B	ENSG00000156970.12	3.21	0.19	1.823	9.32e-66
BUB3	ENSG00000154473.17	45.471	12.86	1.745	5.58e-55
BUD13	ENSG00000137656.11	11.85	4.36	1.261	1.57e-59
BUD31	ENSG00000106245.9	99.511	21.47	2.161	2.93e-67
BX470102.3	ENSG00000238279.1	4.69	0.09	2.384	7.82e-42
BX842568.1	ENSG00000235510.1	0	1.15	-1.104	1.09e-13
BYSL	ENSG00000112578.9	13.92	4.58	1.419	5.65e-50
BZW1	ENSG00000082153.17	83.049	12.65	2.622	1.61e-67
BZW1P2	ENSG00000198406.7	11.07	1.5	2.271	6.17e-49
BZW2	ENSG00000136261.14	40.09	13.74	1.479	1.53e-39
C10orf128	ENSG00000204161.13	7.81	1.62	1.75	3.09e-34
C10orf32	ENSG00000166275.15	14.74	6.09	1.151	1.36e-39
C10orf35	ENSG00000171224.8	8.35	3.26	1.134	2.92e-38
C10orf54	ENSG00000107738.19	47.199	6.11	2.761	2.35e-65
C10orf76	ENSG00000120029.12	12.18	4.68	1.214	1.89e-47
C11orf24	ENSG00000171067.10	35.121	10.28	1.679	2.93e-59
C11orf31	ENSG00000211450.9	106.912	44.31	1.252	4.88e-29
C11orf49	ENSG00000149179.13	28.24	7.22	1.831	1.3e-73
C11orf53	ENSG00000150750.6	2.42	0.1	1.636	2.17e-32
C11orf58	ENSG00000110696.9	106.661	33.369	1.647	1.24e-48
C11orf63	ENSG00000109944.10	2.58	0.59	1.171	2.07e-52
C11orf68	ENSG00000175573.6	35.06	9.99	1.714	7.81e-58
C11orf70	ENSG00000137691.12	3.44	0.28	1.794	9.66e-70
C11orf73	ENSG00000149196.15	36.38	11.07	1.631	5.08e-61
C11orf80	ENSG00000173715.15	15.37	3.28	1.935	7.77e-50
C11orf84	ENSG00000168005.8	12.44	2.72	1.853	6.05e-70
C11orf96	ENSG00000187479.5	45.201	12.15	1.813	1.24e-17
C11orf98	ENSG00000278615.4	78.738	18.67	2.019	2.74e-63
C12orf10	ENSG00000139637.13	44.461	21.5	1.015	3.72e-33
C12orf43	ENSG00000157895.11	7.47	2.76	1.172	4.26e-55
C12orf49	ENSG00000111412.5	16.37	3.29	2.018	5.08e-68
C12orf65	ENSG00000130921.7	9.77	3.18	1.365	2.25e-57
C12orf75	ENSG00000235162.8	92.918	13.32	2.713	2.37e-50
C14orf1	ENSG00000133935.6	22.83	5.62	1.848	3.74e-70
C14orf119	ENSG00000179933.5	52.91	12.41	2.007	2.35e-72
C14orf132	ENSG00000227051.5	3.01	0.77	1.18	4.71e-31
C14orf142	ENSG00000170270.4	10.85	3.98	1.251	6.62e-57
C14orf159	ENSG00000133943.20	23.28	10.8	1.041	6.56e-24
C14orf166	ENSG00000087302.8	180.956	64.44	1.475	1.83e-46
C14orf169	ENSG00000170468.7	6.04	2.3	1.093	1.56e-56
C14orf2	ENSG00000156411.9	129.66	51.918	1.304	9.04e-44
C14orf37	ENSG00000139971.15	1.77	0.24	1.16	9.3e-46
C14orf80	ENSG00000185347.17	11.05	1.83	2.09	6.24e-57
C15orf27	ENSG00000169758.12	0.55	2.54	-1.191	3.5e-63
C15orf39	ENSG00000167173.18	14.6	4.02	1.636	9.72e-60
C15orf40	ENSG00000169609.13	18.25	6.57	1.347	1.55e-57
C15orf41	ENSG00000186073.11	3.74	1.05	1.209	4.29e-50
C15orf48	ENSG00000166920.10	104.119	2.46	4.925	4.9e-69
C15orf57	ENSG00000128891.15	21.159	7.31	1.415	1.61e-49
C16orf13	ENSG00000130731.15	72.288	22.83	1.621	1.94e-41
C16orf45	ENSG00000166780.10	23.569	7.9	1.465	4.6e-29
C16orf54	ENSG00000185905.3	2.05	0.09	1.484	1.36e-36
C16orf59	ENSG00000162062.14	2.06	0.29	1.246	3.04e-50
C16orf62	ENSG00000103544.14	23.36	6.92	1.621	2.45e-53
C16orf70	ENSG00000125149.11	9.33	3.24	1.285	4.47e-53
C16orf72	ENSG00000182831.11	14.25	4.57	1.453	1.76e-57
C16orf74	ENSG00000154102.10	4.19	0.32	1.975	2.75e-35
C16orf87	ENSG00000155330.9	4.57	0.89	1.559	1.58e-67
C16orf91	ENSG00000174109.4	13.77	3.24	1.801	1.53e-79
C16orf95	ENSG00000260456.6	5.07	1.59	1.229	1.3e-49
C17orf49	ENSG00000258315.5	84.729	22.93	1.841	9.14e-58
C17orf53	ENSG00000125319.14	1.33	0.15	1.019	2.88e-52
C17orf62	ENSG00000178927.16	58.209	21.7	1.383	5.37e-33
C17orf89	ENSG00000224877.3	46.25	22.201	1.026	3.1e-28
C18orf8	ENSG00000141452.9	24.669	8.34	1.459	3.56e-49
C19orf24	ENSG00000228300.13	60.241	21.381	1.452	5.25e-36
C19orf25	ENSG00000119559.15	21.06	8.54	1.209	1.06e-30
C19orf33	ENSG00000167644.11	483.24	1.9	7.383	1.45e-81
C19orf38	ENSG00000214212.8	1.96	0.38	1.101	7.98e-31
C19orf43	ENSG00000123144.10	145.35	69.228	1.059	1.06e-25
C19orf47	ENSG00000160392.13	7.99	2.33	1.433	3.01e-68
C19orf52	ENSG00000142444.6	13.02	4.95	1.237	7.29e-57
C19orf53	ENSG00000104979.8	146.941	40.599	1.83	4.49e-58
C19orf66	ENSG00000130813.17	27.68	11.96	1.146	1.1e-24
C19orf70	ENSG00000174917.8	73.282	24.45	1.545	3.41e-48
C1D	ENSG00000197223.11	21.8	6.46	1.612	5.49e-62
C1GALT1	ENSG00000106392.10	18.11	2.05	2.647	2.32e-70
C1GALT1C1	ENSG00000171155.7	23.47	5.7	1.869	3.72e-80
C1orf106	ENSG00000163362.10	64.82	5.12	3.427	1.77e-39
C1orf112	ENSG00000000460.16	2.95	0.77	1.158	5.24e-61
C1orf115	ENSG00000162817.6	10.31	4.42	1.061	5.54e-25
C1orf116	ENSG00000182795.12	27.23	3.85	2.541	1.31e-53
C1orf123	ENSG00000162384.13	44.649	16.58	1.377	1.27e-38
C1orf132	ENSG00000203709.9	0.45	2.29	-1.182	2.72e-25
C1orf162	ENSG00000143110.11	20.15	3.55	2.217	1.26e-33
C1orf186	ENSG00000263961.6	4.88	0.85	1.668	5.44e-24
C1orf198	ENSG00000119280.16	28.899	8.19	1.702	8.55e-48
C1orf21	ENSG00000116667.12	23.779	4.84	2.085	2.82e-47
C1orf216	ENSG00000142686.7	7.43	1.57	1.714	2e-62
C1orf233	ENSG00000228594.3	5.36	0.29	2.302	1.47e-73
C1orf43	ENSG00000143612.18	144.186	52.49	1.441	8.13e-43
C1orf50	ENSG00000164008.13	9.97	4.1	1.105	2.56e-46
C1orf53	ENSG00000203724.10	4.43	1.03	1.419	5.81e-44
C1orf54	ENSG00000118292.8	22.161	1.42	3.259	3.74e-73
C1QA	ENSG00000173372.16	182.48	10.28	4.024	2.22e-57
C1QB	ENSG00000173369.15	181.634	14.66	3.544	5.22e-45
C1QBP	ENSG00000108561.8	71.679	27.751	1.338	1.41e-40
C1QC	ENSG00000159189.11	136.711	10.38	3.597	2.37e-48
C1QTNF1	ENSG00000173918.14	33.91	5.2	2.493	5.38e-56
C1QTNF3	ENSG00000082196.20	16.549	2.76	2.223	7.04e-39
C1QTNF5	ENSG00000223953.4	87.432	7.27	3.419	3.6e-68
C1QTNF6	ENSG00000133466.13	14.37	2.03	2.343	5.46e-56
C1QTNF7	ENSG00000163145.12	1.5	0.17	1.095	1.15e-31
C1R	ENSG00000159403.15	261.632	34.881	2.872	1.09e-42
C1S	ENSG00000182326.14	242.139	35.971	2.717	2.59e-36
C2	ENSG00000166278.14	21.919	0.78	3.687	3.27e-69
C20orf196	ENSG00000171984.14	6.29	1.88	1.34	1.16e-56
C20orf24	ENSG00000101084.16	97.558	23.039	2.036	1.75e-63
C20orf27	ENSG00000101220.17	24.981	8.6	1.436	1.12e-46
C21orf59	ENSG00000159079.18	34.539	14.95	1.156	2.74e-42
C22orf46	ENSG00000184208.10	5.5	1.63	1.305	9.35e-56
C2CD3	ENSG00000168014.16	8.05	3.03	1.167	4.79e-45
C2CD4B	ENSG00000205502.3	4.01	18.53	-1.963	2.47e-32
C2orf15	ENSG00000273045.5	2.69	0.66	1.152	1.63e-46
C2orf27A	ENSG00000197927.12	5.06	1.77	1.129	6.91e-25
C2orf47	ENSG00000162972.10	12.45	4.11	1.396	6.07e-60
C2orf54	ENSG00000172478.17	5.37	0.19	2.42	3.75e-53
C2orf70	ENSG00000173557.14	2.54	0.4	1.338	1.18e-29
C2orf74	ENSG00000237651.6	21.57	7.27	1.448	7.41e-33
C2orf76	ENSG00000186132.14	9.51	4.2	1.015	7.21e-43
C2orf81	ENSG00000159239.11	4.48	0.76	1.639	6.41e-63
C3	ENSG00000125730.16	887.374	141.778	2.637	2.51e-20
C3AR1	ENSG00000171860.4	8.87	1.08	2.246	1.51e-37
C3orf14	ENSG00000114405.10	12.45	4.68	1.244	1.02e-29
C3orf38	ENSG00000179021.9	8.19	1.9	1.664	5.56e-69
C3orf58	ENSG00000181744.8	7.38	1.36	1.828	1.37e-64
C3orf80	ENSG00000180044.4	1.8	0.08	1.374	1.97e-51
C4A	ENSG00000244731.7	94.601	33.171	1.484	4.55e-14
C4B	ENSG00000224389.8	98.407	30.819	1.643	2.94e-14
C4BPA	ENSG00000123838.10	5.04	1.83	1.094	0.0003
C4BPB	ENSG00000123843.12	10.92	2.94	1.597	4.83e-08
C4orf27	ENSG00000056050.6	15.55	6.09	1.223	5.08e-51
C4orf3	ENSG00000164096.12	86.36	17.27	2.257	4.61e-72
C4orf32	ENSG00000174749.5	1.98	0.47	1.019	2.65e-47
C4orf33	ENSG00000151470.12	9.14	3.64	1.128	8.78e-36
C4orf48	ENSG00000243449.6	22.7	5.86	1.789	5.01e-12
C5	ENSG00000106804.7	1.32	6.24	-1.642	3.13e-40
C5AR1	ENSG00000197405.7	9.69	1.63	2.023	4.39e-37
C5orf15	ENSG00000113583.7	47.199	8	2.421	1.84e-76
C5orf24	ENSG00000181904.8	15.19	4.52	1.552	1.9e-49
C5orf28	ENSG00000151881.14	7.38	2.57	1.231	3.88e-49
C5orf30	ENSG00000181751.9	6.27	1.7	1.429	1.41e-41
C5orf46	ENSG00000178776.4	7.05	0.14	2.82	6.41e-43
C5orf51	ENSG00000205765.8	7.32	2.46	1.266	2.38e-53
C6orf1	ENSG00000186577.11	35.631	7.81	2.056	1.73e-56
C6orf106	ENSG00000196821.9	38.609	10.53	1.78	6.71e-61
C6orf132	ENSG00000188112.8	18.71	6.68	1.36	1.66e-16
C6orf203	ENSG00000130349.9	13.76	6.1	1.056	5.15e-38
C6orf222	ENSG00000189325.6	4.31	0.19	2.158	1.03e-20
C6orf223	ENSG00000181577.15	3.57	0.23	1.894	3.98e-37
C6orf226	ENSG00000221821.3	11.17	5.05	1.008	3.32e-25
C6orf47	ENSG00000204439.3	19.271	4.94	1.771	3.6e-75
C6orf89	ENSG00000198663.16	23.501	10.76	1.059	1.25e-35
C7orf49	ENSG00000122783.16	26.541	10.74	1.23	1.21e-42
C7orf60	ENSG00000164603.11	3.98	1.15	1.212	3.16e-65
C7orf73	ENSG00000243317.7	27.92	6.34	1.978	3.93e-79
C8orf31	ENSG00000177335.10	2.91	0.22	1.68	4.36e-33
C8orf33	ENSG00000182307.12	20.43	8.9	1.114	3.31e-37
C8orf34-AS1	ENSG00000248801.6	0.05	1.24	-1.093	1.02e-67
C8orf4	ENSG00000176907.4	48.331	13.49	1.767	1.69e-22
C8orf46	ENSG00000169085.11	0.36	1.81	-1.047	3.12e-30
C8orf58	ENSG00000241852.9	7.54	2.55	1.266	2.33e-41
C8orf76	ENSG00000189376.11	17.95	5.04	1.65	8.01e-63
C8orf88	ENSG00000253250.2	2.11	0.34	1.215	4.92e-36
C9orf114	ENSG00000198917.11	29.199	12.95	1.114	1.17e-31
C9orf116	ENSG00000160345.12	5.49	1.88	1.172	1.57e-35
C9orf152	ENSG00000188959.9	8.05	1.75	1.719	3.4e-20
C9orf156	ENSG00000136932.13	8.28	3.56	1.025	2.06e-37
C9orf16	ENSG00000171159.4	113.22	36.579	1.604	7.74e-31
C9orf64	ENSG00000165118.14	9.14	2.02	1.747	5.09e-70
C9orf69	ENSG00000238227.7	21.381	5.17	1.859	7.63e-70
C9orf78	ENSG00000136819.14	43.459	15.82	1.402	7.72e-48
C9orf89	ENSG00000165233.17	39.151	6.14	2.491	1.65e-68
CA11	ENSG00000063180.8	10.09	4.01	1.146	1.07e-29
CA12	ENSG00000074410.13	7.72	17.84	-1.111	5.87e-09
CA13	ENSG00000185015.7	4.84	0.76	1.73	1.95e-51
CA2	ENSG00000104267.9	22.99	9.56	1.184	6.74e-13
CA4	ENSG00000167434.9	1.36	10.45	-2.278	1.2e-27
CA5BP1	ENSG00000186312.10	10.42	3.05	1.496	1.37e-47
CA9	ENSG00000107159.12	37.07	1.6	3.872	4.23e-26
CAB39	ENSG00000135932.10	36.4	8.37	1.997	5.25e-62
CABLES1	ENSG00000134508.12	7.08	1.27	1.832	2.94e-56
CABP4	ENSG00000175544.13	2.91	0.34	1.545	6.99e-37
CABYR	ENSG00000154040.20	2.13	0.33	1.235	1.09e-45
CACFD1	ENSG00000160325.14	20.87	7.07	1.438	3.55e-46
CACNA1C	ENSG00000151067.20	5.09	0.64	1.893	6.93e-50
CACNA1H	ENSG00000196557.10	8	2.34	1.43	1.72e-28
CACNA2D1	ENSG00000153956.15	2.4	0.29	1.398	6.12e-44
CACNA2D4	ENSG00000151062.14	4.82	1	1.541	1.72e-37
CACNB1	ENSG00000067191.15	5.18	1.76	1.163	3.14e-28
CACNB3	ENSG00000167535.7	17.881	1.72	2.795	1.28e-73
CACNG4	ENSG00000075461.5	2.39	0.11	1.611	4.81e-34
CACUL1	ENSG00000151893.14	7.19	2.86	1.085	2.47e-45
CACYBP	ENSG00000116161.17	48.371	13.48	1.77	2.46e-51
CAD	ENSG00000084774.13	16.7	7.81	1.007	3.02e-27
CADM1	ENSG00000182985.16	10.39	3.48	1.346	3.02e-28
CALB2	ENSG00000172137.18	6.41	0.19	2.638	5.09e-40
CALCOCO2	ENSG00000136436.14	56.649	25.21	1.137	7.63e-30
CALCRL	ENSG00000064989.12	7.87	1.06	2.106	2.5e-47
CALD1	ENSG00000122786.19	125.957	13.64	3.116	1.22e-50
CALHM2	ENSG00000138172.10	20.41	3.23	2.34	5.74e-53
CALM1	ENSG00000198668.10	214.286	70.531	1.59	1.96e-46
CALM2	ENSG00000143933.16	557.141	79.291	2.797	8.48e-70
CALM3	ENSG00000160014.16	164.186	46.649	1.794	2.95e-54
CALML4	ENSG00000129007.14	34.489	5.13	2.533	1.4e-51
CALR	ENSG00000179218.13	583.989	120.241	2.271	5.44e-60
CALU	ENSG00000128595.16	78.351	15.42	2.273	1.15e-59
CAMK1	ENSG00000134072.10	13.53	3.63	1.65	2.68e-45
CAMK2D	ENSG00000145349.16	16.59	3.36	2.012	2.72e-58
CAMK2G	ENSG00000148660.20	14.43	4.74	1.427	3.68e-44
CAMK2N1	ENSG00000162545.5	72.972	2.88	4.253	1.89e-94
CAMK2N2	ENSG00000163888.3	1.15	11.41	-2.529	3.84e-38
CAMK4	ENSG00000152495.10	1.34	0.07	1.129	3.85e-42
CAMKK2	ENSG00000110931.18	16.03	6.35	1.212	4.15e-35
CAMLG	ENSG00000164615.4	34.21	12.32	1.402	9.84e-52
CAMSAP1	ENSG00000130559.18	7.25	2.67	1.169	1.06e-43
CAMSAP2	ENSG00000118200.14	7.82	1.37	1.896	3.74e-66
CAMTA1	ENSG00000171735.18	56.308	14.11	1.923	3.13e-62
CAND1	ENSG00000111530.12	27.54	11.65	1.174	6.36e-42
CANT1	ENSG00000171302.16	40.36	7.73	2.244	7.74e-64
CAP1	ENSG00000131236.16	223.386	25.08	3.105	2.23e-74
CAPG	ENSG00000042493.15	367.092	15.19	4.507	6.41e-70
CAPN1	ENSG00000014216.15	129.966	41.9	1.61	2.23e-37
CAPN10	ENSG00000142330.19	16.7	7.28	1.096	1.04e-18
CAPN12	ENSG00000182472.8	18.93	4.01	1.992	8.73e-20
CAPN2	ENSG00000162909.17	152.81	28.21	2.397	1.4e-64
CAPN5	ENSG00000149260.14	36.79	2.26	3.535	1.27e-59
CAPN6	ENSG00000077274.8	4.8	1.38	1.285	2.36e-16
CAPN8	ENSG00000203697.11	71.169	1.22	5.023	7.26e-48
CAPN9	ENSG00000135773.12	4.91	0.03	2.521	1.94e-28
CAPNS1	ENSG00000126247.10	737.448	123.716	2.566	1.09e-64
CAPRIN1	ENSG00000135387.19	73.618	21.23	1.747	2.39e-56
CAPS	ENSG00000105519.12	39.121	11.65	1.665	6.39e-29
CAPZA1	ENSG00000116489.12	62.5	15.1	1.98	1.5e-50
CAPZA2	ENSG00000198898.12	69.41	13.69	2.261	1.49e-60
CAPZB	ENSG00000077549.17	302.564	36.921	3.001	5.69e-77
CARD10	ENSG00000100065.14	21.76	5.78	1.747	9.78e-44
CARD11	ENSG00000198286.9	20.12	0.47	3.845	1.42e-75
CARD16	ENSG00000204397.7	28.34	1.54	3.53	5.49e-75
CARD6	ENSG00000132357.13	7.45	0.99	2.086	1.45e-30
CARD9	ENSG00000187796.13	2.05	0.52	1.005	2.85e-24
CARHSP1	ENSG00000153048.10	91.81	19.77	2.16	4.03e-60
CARM1	ENSG00000142453.11	23.429	10.81	1.049	1.21e-31
CARS	ENSG00000110619.16	29.84	11.06	1.355	1.59e-43
CARS2	ENSG00000134905.16	37.569	17.771	1.039	2.14e-26
CASC15	ENSG00000272168.5	1.56	0.24	1.046	4.55e-39
CASC4	ENSG00000166734.18	48.509	9.02	2.305	9.43e-70
CASC5	ENSG00000137812.19	1.44	0.07	1.189	2.48e-51
CASC8	ENSG00000246228.6	1.37	0	1.245	2.28e-35
CASK	ENSG00000147044.20	20.579	4.32	2.02	1.46e-67
CASP1	ENSG00000137752.22	26.679	2.65	2.923	1.67e-53
CASP10	ENSG00000003400.14	7.58	2.13	1.455	8.86e-39
CASP2	ENSG00000106144.19	11.26	3.39	1.482	9.51e-56
CASP3	ENSG00000164305.17	18.93	3.6	2.115	2.21e-75
CASP4	ENSG00000196954.12	70.761	32.199	1.112	2.08e-16
CASP6	ENSG00000138794.9	17.84	7.78	1.101	5.06e-28
CASP7	ENSG00000165806.19	20.71	8.01	1.269	1.15e-31
CASP8	ENSG00000064012.21	17.019	3.92	1.873	4.85e-43
CAST	ENSG00000153113.23	112.228	21.35	2.341	1.81e-57
CATSPER1	ENSG00000175294.5	2.16	0.06	1.576	5.13e-48
CATSPERB	ENSG00000133962.7	1.53	4.41	-1.096	1.19e-14
CAV1	ENSG00000105974.11	42.261	5.06	2.836	6.07e-52
CAV2	ENSG00000105971.14	51.282	9.6	2.302	2.89e-39
CBFA2T3	ENSG00000129993.14	2.35	11.83	-1.937	2.26e-42
CBFB	ENSG00000067955.13	29.13	5.96	2.114	8.96e-69
CBL	ENSG00000110395.4	3.55	0.85	1.298	5.32e-50
CBLB	ENSG00000114423.18	14.41	3.38	1.815	2.47e-54
CBLC	ENSG00000142273.10	26.451	7.36	1.715	6.29e-25
CBLN3	ENSG00000139899.10	3.01	0.63	1.299	3.96e-41
CBR1	ENSG00000159228.12	57.531	13.1	2.054	1.4e-61
CBR3	ENSG00000159231.5	6.37	0.52	2.278	8.59e-73
CBS	ENSG00000274276.4	0.76	6.14	-2.02	5.03e-20
CBX1	ENSG00000108468.14	31.021	8.11	1.813	1.22e-63
CBX3	ENSG00000122565.18	97.059	26.259	1.847	8.78e-51
CBX5	ENSG00000094916.13	10.27	3.89	1.205	3.51e-50
CBX8	ENSG00000141570.10	3.98	1.23	1.159	1.71e-45
CBY1	ENSG00000100211.10	31.241	13.67	1.136	6.04e-38
CC2D2A	ENSG00000048342.15	7.93	1.49	1.843	3.41e-45
CCAR2	ENSG00000158941.16	62.059	25.941	1.227	9.4e-37
CCBL1	ENSG00000171097.13	4.98	1.61	1.196	1.87e-39
CCDC102A	ENSG00000135736.5	6.78	1.89	1.429	2.17e-44
CCDC102B	ENSG00000150636.15	3.79	0.7	1.495	2.36e-47
CCDC106	ENSG00000173581.7	11.06	3.43	1.445	4.79e-37
CCDC109B	ENSG00000005059.15	12.3	0.86	2.838	1.49e-80
CCDC110	ENSG00000168491.9	0.64	4.18	-1.659	7.68e-54
CCDC115	ENSG00000136710.9	36.41	8.63	1.958	6.11e-67
CCDC12	ENSG00000160799.11	69.012	16.53	1.998	3.53e-64
CCDC124	ENSG00000007080.10	75.389	26.62	1.468	4.13e-33
CCDC137	ENSG00000185298.12	14.97	5.03	1.405	2.11e-37
CCDC144NL-AS1	ENSG00000233098.8	2.42	0.08	1.663	2.4e-50
CCDC146	ENSG00000135205.14	5.45	2.07	1.071	1.76e-25
CCDC153	ENSG00000248712.7	1.86	0.2	1.253	7.17e-46
CCDC155	ENSG00000161609.9	0.05	1.26	-1.106	9.41e-61
CCDC167	ENSG00000198937.8	22.811	6.57	1.653	5.58e-56
CCDC176	ENSG00000119636.15	3.94	1.45	1.012	2.93e-37
CCDC184	ENSG00000177875.4	1.6	0.21	1.104	6.34e-37
CCDC22	ENSG00000101997.12	13.15	5.54	1.113	8.52e-48
CCDC23	ENSG00000177868.11	24.13	4.58	2.171	5.67e-72
CCDC24	ENSG00000159214.12	13.83	5.72	1.142	6.59e-24
CCDC28B	ENSG00000160050.14	9.89	2.36	1.696	5.74e-60
CCDC3	ENSG00000151468.10	9.46	1.16	2.276	1.29e-48
CCDC34	ENSG00000109881.16	6.06	2.24	1.124	2.07e-43
CCDC43	ENSG00000180329.13	11.97	3.73	1.455	1.49e-69
CCDC47	ENSG00000108588.13	49.319	16.39	1.533	5.61e-49
CCDC51	ENSG00000164051.13	11.09	1.94	2.04	2.48e-85
CCDC53	ENSG00000120860.10	34.811	8.27	1.95	1.71e-71
CCDC57	ENSG00000176155.18	34.91	15.64	1.11	8.25e-23
CCDC58	ENSG00000160124.9	20.99	9.52	1.064	2.65e-34
CCDC59	ENSG00000133773.11	28.63	11.37	1.26	9.14e-43
CCDC6	ENSG00000108091.10	23	6.47	1.684	1.22e-54
CCDC61	ENSG00000104983.8	10.53	3.93	1.226	9.63e-39
CCDC64	ENSG00000135127.11	11.18	3.31	1.499	7.61e-30
CCDC64B	ENSG00000162069.14	20.129	63.769	-1.616	2.13e-24
CCDC68	ENSG00000166510.13	3.72	1	1.239	3.63e-26
CCDC71	ENSG00000177352.9	13.53	3.5	1.691	2.03e-72
CCDC71L	ENSG00000253276.2	14.65	2.88	2.012	4.72e-56
CCDC74A	ENSG00000163040.14	11.15	1.19	2.472	8.1e-67
CCDC74B	ENSG00000152076.18	2.26	0.57	1.054	1.17e-35
CCDC77	ENSG00000120647.9	4.37	1.56	1.069	2.15e-11
CCDC78	ENSG00000162004.16	2.19	0.5	1.089	4.4e-20
CCDC80	ENSG00000091986.15	108.638	8.91	3.468	1.01e-43
CCDC86	ENSG00000110104.11	18.64	7.44	1.218	8.04e-41
CCDC88B	ENSG00000168071.21	26.21	4.42	2.328	4.25e-47
CCDC90B	ENSG00000137500.9	32.271	11.52	1.41	9.89e-50
CCDC92	ENSG00000119242.8	29.209	7.72	1.793	2.29e-57
CCDC96	ENSG00000173013.5	1.7	0.33	1.022	4.14e-50
CCDC97	ENSG00000142039.3	16.68	6.51	1.235	1.93e-47
CCK	ENSG00000187094.11	1.58	0.11	1.217	3.12e-16
CCKBR	ENSG00000110148.9	0.3	2.71	-1.513	2.65e-26
CCL11	ENSG00000172156.3	2.75	0.44	1.381	8.73e-17
CCL13	ENSG00000181374.7	3.78	0.17	2.031	1.56e-35
CCL15	ENSG00000275718.1	2.36	0	1.748	4.22e-30
CCL15-CCL14	ENSG00000275688.4	8.49	0.24	2.936	1.39e-46
CCL17	ENSG00000102970.10	6.5	0	2.907	5.58e-38
CCL18	ENSG00000275385.1	29.331	0.05	4.852	1.33e-56
CCL19	ENSG00000172724.11	26.629	0.44	4.262	3.24e-33
CCL2	ENSG00000108691.9	52.962	21.55	1.259	5.96e-09
CCL20	ENSG00000115009.11	19.02	0.3	3.945	6.93e-50
CCL21	ENSG00000137077.7	38.751	3.36	3.189	1.04e-25
CCL22	ENSG00000102962.4	2.69	0.02	1.855	7.15e-44
CCL24	ENSG00000106178.6	4.49	0	2.457	7.57e-33
CCL26	ENSG00000006606.8	2.55	0.08	1.717	1.67e-37
CCL28	ENSG00000151882.11	11.02	4.17	1.217	6.24e-13
CCL3	ENSG00000277632.1	6.61	0.3	2.549	1.97e-43
CCL3L3	ENSG00000276085.1	1.92	0.1	1.408	5.17e-28
CCL4	ENSG00000275302.1	7.51	0.72	2.307	1.92e-38
CCL4L2	ENSG00000276070.4	5.3	0.17	2.429	8.34e-41
CCL5	ENSG00000271503.5	22.88	1.1	3.507	1.62e-57
CCM2	ENSG00000136280.15	40.63	10.99	1.796	6.8e-62
CCNA2	ENSG00000145386.9	5.14	0.36	2.175	6.96e-65
CCNB1	ENSG00000134057.14	19.68	1.54	3.025	9.14e-83
CCNB2	ENSG00000157456.7	8.88	0.23	3.006	1.15e-72
CCND1	ENSG00000110092.3	56.68	10.99	2.266	1.58e-53
CCND3	ENSG00000112576.12	64.35	11.98	2.332	5.67e-62
CCNDBP1	ENSG00000166946.13	43.77	17.43	1.28	2.13e-36
CCNE1	ENSG00000105173.13	3.63	0.57	1.56	1.06e-57
CCNF	ENSG00000162063.12	2.58	0.43	1.324	3.4e-61
CCNG2	ENSG00000138764.13	18.491	4.01	1.96	5.17e-43
CCNH	ENSG00000134480.13	29.321	11.81	1.243	7.63e-44
CCNI	ENSG00000118816.9	156.866	59.03	1.395	2.97e-38
CCNI2	ENSG00000205089.7	4.18	1.07	1.323	1.07e-40
CCNJL	ENSG00000135083.14	1.46	0.09	1.174	3.74e-41
CCNK	ENSG00000090061.17	21.091	7.04	1.458	3.13e-51
CCNY	ENSG00000108100.17	24.16	10.1	1.181	2.11e-43
CCR1	ENSG00000163823.3	3.43	0.4	1.662	7.16e-36
CCR2	ENSG00000121807.5	1.52	0.23	1.035	1.2e-20
CCR5	ENSG00000160791.13	1.96	0.18	1.327	1.37e-16
CCR6	ENSG00000112486.14	1.46	0	1.299	3.25e-37
CCR7	ENSG00000126353.3	2.12	0.2	1.378	7.6e-27
CCRL2	ENSG00000121797.9	6.31	0.48	2.304	8.08e-57
CCRN4L	ENSG00000151014.5	2.82	0.74	1.134	3.04e-48
CCS	ENSG00000173992.8	43.26	20.659	1.031	1.71e-21
CCSER2	ENSG00000107771.15	8.41	2.51	1.423	8.42e-52
CCT2	ENSG00000166226.12	69.3	27.161	1.32	2.03e-27
CCT3	ENSG00000163468.14	152.239	43.17	1.795	1.59e-52
CCT5	ENSG00000150753.11	128.372	32.199	1.962	3.81e-58
CCT6A	ENSG00000146731.10	108.638	44.071	1.282	6.47e-37
CCT7	ENSG00000135624.15	135.082	44.421	1.583	1.68e-50
CCZ1	ENSG00000122674.11	52.749	14.96	1.752	1.58e-63
CCZ1B	ENSG00000146574.15	39.951	15.93	1.274	6.62e-36
CD109	ENSG00000156535.13	4.49	0.15	2.255	1.83e-59
CD14	ENSG00000170458.13	56.398	5.93	3.05	5.78e-54
CD151	ENSG00000177697.17	383.397	140.643	1.44	1.16e-25
CD163	ENSG00000177575.12	31.299	9.21	1.661	1.29e-15
CD163L1	ENSG00000177675.8	4.25	0.26	2.059	5.05e-50
CD164	ENSG00000135535.14	152.239	45.48	1.721	1.04e-44
CD180	ENSG00000134061.5	1.13	0.06	1.007	1.17e-31
CD1A	ENSG00000158477.6	1.02	0	1.014	1.08e-31
CD1C	ENSG00000158481.12	3.15	0.08	1.942	9.48e-42
CD1D	ENSG00000158473.6	1.86	0.38	1.051	5.48e-29
CD1E	ENSG00000158488.15	1.66	0.05	1.341	9.04e-37
CD2	ENSG00000116824.4	7.05	0.42	2.503	9.7e-45
CD200	ENSG00000091972.18	7.7	1.73	1.672	1.23e-39
CD207	ENSG00000116031.8	1.46	0.03	1.256	4.09e-34
CD22	ENSG00000012124.14	2.46	0.5	1.206	4.42e-20
CD247	ENSG00000198821.10	3.66	0.28	1.864	1.4e-41
CD248	ENSG00000174807.3	42.789	3.72	3.214	3.14e-53
CD27	ENSG00000139193.3	5	0.28	2.229	1.38e-39
CD27-AS1	ENSG00000215039.6	29.539	12.77	1.149	4.5e-29
CD276	ENSG00000103855.17	82.452	11.4	2.751	3.2e-72
CD2AP	ENSG00000198087.7	21.941	5.4	1.842	1.84e-44
CD2BP2	ENSG00000169217.8	51.499	17.36	1.516	2.81e-52
CD300A	ENSG00000167851.13	11.79	0.69	2.92	1.68e-59
CD300C	ENSG00000167850.3	1.78	0.16	1.261	2.18e-38
CD300LF	ENSG00000186074.18	3.79	0.16	2.046	1.3e-44
CD33	ENSG00000105383.14	3.75	0.82	1.384	2.8e-12
CD34	ENSG00000174059.16	23.3	6.29	1.737	9.62e-40
CD37	ENSG00000104894.11	26.42	2.76	2.866	5.16e-39
CD38	ENSG00000004468.12	1.59	0.15	1.171	2.04e-26
CD3D	ENSG00000167286.9	9.89	0.41	2.949	3.24e-49
CD3E	ENSG00000198851.9	11.78	0.71	2.902	6.46e-45
CD3EAP	ENSG00000117877.10	3.24	1.04	1.055	1.27e-37
CD3G	ENSG00000160654.9	1.42	0.09	1.151	2.65e-30
CD4	ENSG00000010610.9	23.11	2.05	2.983	5.09e-54
CD40	ENSG00000101017.13	23.29	9.49	1.211	1.24e-17
CD46	ENSG00000117335.18	105.338	49.09	1.086	6.59e-22
CD47	ENSG00000196776.14	90.917	16.02	2.433	7.38e-58
CD48	ENSG00000117091.9	12.25	0.57	3.077	5.24e-45
CD5	ENSG00000110448.10	2.15	0.16	1.441	4.23e-34
CD52	ENSG00000169442.8	76.968	1.88	4.759	2.65e-60
CD53	ENSG00000143119.12	38.39	3.09	3.268	2.75e-45
CD55	ENSG00000196352.13	103.042	5.82	3.931	2.18e-74
CD58	ENSG00000116815.15	23.92	2.4	2.874	8.1e-67
CD59	ENSG00000085063.14	442.826	72.67	2.591	2.15e-65
CD6	ENSG00000013725.14	3.44	0.34	1.728	1.01e-40
CD63	ENSG00000135404.11	1573.87	349.051	2.17	7.51e-55
CD68	ENSG00000129226.13	144.958	4.89	4.631	4.15e-70
CD69	ENSG00000110848.8	4.14	0.52	1.758	4.97e-29
CD7	ENSG00000173762.7	5.64	0.41	2.236	5.07e-49
CD72	ENSG00000137101.12	5.23	1.77	1.169	5.17e-21
CD74	ENSG00000019582.14	2261.71	99.477	4.493	5.73e-65
CD79A	ENSG00000105369.9	6.81	0.2	2.702	1.17e-31
CD79B	ENSG00000007312.12	3.94	0.46	1.759	1.44e-25
CD81	ENSG00000110651.11	490.19	169.518	1.526	9.16e-27
CD82	ENSG00000085117.11	97.51	10.61	3.085	1.29e-77
CD83	ENSG00000112149.9	6.43	0.63	2.188	2.68e-50
CD86	ENSG00000114013.15	6.24	0.28	2.5	1.59e-52
CD8A	ENSG00000153563.15	4.05	0.69	1.579	2.92e-26
CD8B	ENSG00000172116.21	2.44	0.32	1.382	5.44e-29
CD9	ENSG00000010278.11	252.807	33.62	2.874	5.84e-57
CD93	ENSG00000125810.9	16.99	2.58	2.329	4.35e-52
CD96	ENSG00000153283.12	3.02	0.16	1.793	1.68e-36
CD99	ENSG00000002586.17	286.302	88.48	1.683	1.98e-42
CD99L2	ENSG00000102181.19	16.46	6.98	1.13	1.87e-28
CD99P1	ENSG00000223773.6	5.42	2.14	1.032	7.11e-32
CDA	ENSG00000158825.5	18.71	0.38	3.836	8.25e-62
CDADC1	ENSG00000102543.14	6.15	1.87	1.317	1.24e-62
CDC123	ENSG00000151465.13	46.571	11.39	1.941	1.78e-68
CDC20	ENSG00000117399.13	15.07	0.22	3.719	2.04e-77
CDC23	ENSG00000094880.10	12.26	4.36	1.307	3.59e-52
CDC25B	ENSG00000101224.17	19.88	5.2	1.752	4.46e-41
CDC25C	ENSG00000158402.18	1.54	0.03	1.302	5.6e-56
CDC26	ENSG00000176386.8	38.51	11.01	1.718	1.47e-60
CDC27	ENSG00000004897.11	18.23	5.59	1.545	1.24e-56
CDC37	ENSG00000105401.6	156.172	57.699	1.421	1.64e-34
CDC42	ENSG00000070831.15	155.05	27.87	2.434	8.73e-69
CDC42BPA	ENSG00000143776.18	16.781	4.06	1.813	4.49e-58
CDC42BPB	ENSG00000198752.9	45.389	14.54	1.578	4.88e-39
CDC42EP2	ENSG00000149798.4	16.5	1.87	2.608	5.1e-69
CDC42EP3	ENSG00000163171.7	18.01	2.61	2.397	2.76e-64
CDC42EP5	ENSG00000167617.2	75.583	5.23	3.62	3.18e-60
CDC42SE1	ENSG00000197622.12	55.66	22.23	1.286	1.71e-30
CDC42SE2	ENSG00000158985.13	26.85	7.92	1.643	1.3e-56
CDC45	ENSG00000093009.9	3.52	0.15	1.975	8.95e-60
CDC5L	ENSG00000096401.7	8.46	2.82	1.308	5.56e-59
CDC6	ENSG00000094804.9	2.94	0.57	1.327	8.57e-39
CDC73	ENSG00000134371.9	10.32	2.7	1.613	2.27e-60
CDCA2	ENSG00000184661.13	1.35	0.04	1.176	1.41e-52
CDCA3	ENSG00000111665.11	6.93	0.69	2.23	4.52e-62
CDCA4	ENSG00000170779.10	7.44	1.14	1.98	1.56e-74
CDCA5	ENSG00000146670.9	5.98	0.23	2.505	3.15e-76
CDCA7	ENSG00000144354.13	8.01	0.62	2.476	3.24e-32
CDCA8	ENSG00000134690.10	5.46	0.29	2.324	6.24e-70
CDCP1	ENSG00000163814.7	22.02	2.65	2.657	2.12e-61
CDH1	ENSG00000039068.18	112.259	33.751	1.705	1.55e-30
CDH11	ENSG00000140937.13	35.309	0.89	4.264	2.47e-67
CDH13	ENSG00000140945.15	3.82	0.19	2.018	5.6e-60
CDH17	ENSG00000079112.9	6.6	0.08	2.815	4.28e-31
CDH2	ENSG00000170558.8	3.16	0.15	1.855	7.97e-33
CDH3	ENSG00000062038.13	50.882	0.42	5.191	1.14e-72
CDH5	ENSG00000179776.17	12.37	2.59	1.897	2.18e-45
CDH6	ENSG00000113361.12	3.05	0.19	1.767	2.22e-51
CDHR2	ENSG00000074276.10	13.65	0.1	3.735	1.07e-54
CDHR5	ENSG00000099834.18	9.46	0.65	2.664	1.09e-42
CDIPT	ENSG00000103502.13	81.639	34.429	1.222	5.74e-33
CDK1	ENSG00000170312.15	12.16	0.33	3.307	3.65e-84
CDK12	ENSG00000167258.13	12.75	5.29	1.128	4.25e-36
CDK14	ENSG00000058091.16	9.17	2.87	1.394	1.44e-34
CDK16	ENSG00000102225.15	52.261	24.401	1.068	4.41e-31
CDK17	ENSG00000059758.7	8.85	2.94	1.322	4.57e-38
CDK19	ENSG00000155111.14	5.49	1.43	1.417	5.4e-56
CDK2	ENSG00000123374.10	19.51	6.12	1.526	2e-36
CDK2AP1	ENSG00000111328.6	119.543	18.03	2.663	3.49e-79
CDK4	ENSG00000135446.16	77.751	30.721	1.312	6.87e-43
CDK5	ENSG00000164885.12	15.66	2.95	2.076	9.55e-83
CDK5R1	ENSG00000176749.8	1.87	0.38	1.056	1.58e-32
CDK5RAP2	ENSG00000136861.17	17.25	6.46	1.291	6.01e-51
CDK6	ENSG00000105810.9	6.58	1.86	1.406	3.91e-40
CDK7	ENSG00000134058.10	21.83	6.26	1.653	5.69e-66
CDKL1	ENSG00000100490.9	3.13	0.67	1.306	7.83e-41
CDKN1A	ENSG00000124762.13	101.398	39.251	1.347	1.99e-19
CDKN1B	ENSG00000111276.10	24	9	1.322	4.57e-40
CDKN1C	ENSG00000129757.12	22.54	9.6	1.151	3.99e-16
CDKN2A	ENSG00000147889.16	6.73	0.5	2.365	3.24e-26
CDKN2AIP	ENSG00000168564.5	11.38	4.26	1.235	8.52e-45
CDKN2B	ENSG00000147883.10	11.16	0.53	2.991	7.79e-54
CDKN2D	ENSG00000129355.6	13.7	2.05	2.269	3.34e-70
CDKN3	ENSG00000100526.19	10.02	0.33	3.051	1.04e-86
CDON	ENSG00000064309.14	2.32	0.59	1.062	1.26e-28
CDR2	ENSG00000140743.7	20.74	4.98	1.862	1.57e-61
CDR2L	ENSG00000109089.7	19.129	1.36	3.092	2.13e-74
CDRT4	ENSG00000239704.10	2.18	6.5	-1.238	2.53e-13
CDS1	ENSG00000163624.5	10.13	1.55	2.126	2.25e-65
CDS2	ENSG00000101290.13	13.14	3.39	1.687	7.89e-67
CDT1	ENSG00000167513.8	3.97	0.22	2.026	8.05e-60
CDV3	ENSG00000091527.15	61.239	27.959	1.104	1.16e-27
CDYL	ENSG00000153046.17	9.37	1.9	1.838	6.49e-76
CDYL2	ENSG00000166446.14	1.89	0.4	1.046	2.76e-47
CEACAM1	ENSG00000079385.21	25.41	0.89	3.805	1.63e-77
CEACAM21	ENSG00000007129.17	1.81	0.15	1.289	4.52e-37
CEACAM5	ENSG00000105388.14	134.279	0.07	6.982	5.59e-53
CEACAM6	ENSG00000086548.8	518.14	1.59	7.647	4.58e-72
CEACAM7	ENSG00000007306.14	10.76	0.56	2.914	6.04e-28
CEBPB	ENSG00000172216.5	58.969	12.16	2.188	1.62e-41
CEBPG	ENSG00000153879.8	16.28	5	1.526	3.27e-49
CEBPZ	ENSG00000115816.13	28.769	10.4	1.385	1.8e-48
CEBPZOS	ENSG00000218739.9	22	7.53	1.431	4.5e-54
CECR1	ENSG00000093072.15	17.579	2.96	2.23	2.65e-34
CEL	ENSG00000170835.13	19.291	12250	-9.238	1.22e-47
CELA2A	ENSG00000142615.7	4.53	10247.6	-10.856	2.76e-44
CELA2B	ENSG00000215704.9	2	1188.23	-8.631	7.4e-41
CELA3A	ENSG00000142789.19	47.431	32225.2	-9.378	1.81e-41
CELA3B	ENSG00000219073.7	8.97	13424.7	-10.395	7.29e-49
CELF1	ENSG00000149187.17	25.149	11.76	1.035	2.21e-26
CELF2	ENSG00000048740.17	4.01	0.79	1.485	2.19e-29
CELP	ENSG00000170827.9	0.18	187.415	-7.319	4.84e-69
CELSR1	ENSG00000075275.16	10.59	0.49	2.96	5.6e-68
CELSR3	ENSG00000008300.14	2.72	0.64	1.182	2.9e-24
CEMIP	ENSG00000103888.15	9.75	0.33	3.015	4.57e-55
CENPA	ENSG00000115163.14	3.11	0.09	1.915	1.12e-59
CENPB	ENSG00000125817.7	47.3	14.54	1.636	8.36e-56
CENPBD1	ENSG00000177946.5	4.64	1.76	1.031	6.02e-20
CENPBD1P1	ENSG00000213753.10	18.25	8.03	1.092	3.73e-39
CENPE	ENSG00000138778.11	1.12	0.05	1.014	7.07e-54
CENPF	ENSG00000117724.12	10.69	0.13	3.371	5.54e-59
CENPH	ENSG00000153044.9	4.54	0.65	1.747	1.62e-74
CENPK	ENSG00000123219.12	4.08	0.26	2.011	6.87e-63
CENPL	ENSG00000120334.15	2.66	0.44	1.346	7.34e-71
CENPM	ENSG00000100162.14	8.82	0.26	2.962	5.22e-61
CENPN	ENSG00000166451.13	7.22	1.22	1.889	1.59e-64
CENPO	ENSG00000138092.10	3.66	0.77	1.397	5.76e-66
CENPU	ENSG00000151725.11	6.73	0.67	2.211	2.16e-63
CENPV	ENSG00000166582.9	22.7	10.06	1.1	5.8e-20
CENPW	ENSG00000203760.8	12.83	0.73	2.999	7.22e-78
CEP104	ENSG00000116198.12	12.42	5.68	1.006	3.95e-30
CEP126	ENSG00000110318.13	2.65	0.68	1.119	5.91e-37
CEP131	ENSG00000141577.13	8.52	3.33	1.137	8.56e-28
CEP170	ENSG00000143702.15	14.44	1.88	2.423	6.96e-65
CEP250	ENSG00000126001.15	10.24	3.93	1.189	4.46e-38
CEP350	ENSG00000135837.15	8.03	3.49	1.008	1.68e-37
CEP41	ENSG00000106477.18	6.51	1.73	1.46	3.35e-54
CEP55	ENSG00000138180.15	5.54	0.06	2.625	9.81e-72
CEP89	ENSG00000121289.17	9.9	2.7	1.559	4.45e-22
CEPT1	ENSG00000134255.13	16.28	6.99	1.113	1.04e-31
CERCAM	ENSG00000167123.18	53.94	9.42	2.398	7.34e-52
CERKL	ENSG00000188452.13	3.1	0.25	1.714	2.21e-54
CERS2	ENSG00000143418.19	133.444	50.45	1.386	3.52e-34
CERS4	ENSG00000090661.11	10.53	43.64	-1.953	4.46e-39
CERS5	ENSG00000139624.12	35.461	10	1.729	4.06e-56
CERS6	ENSG00000172292.14	12.12	1.56	2.358	1.68e-69
CERS6-AS1	ENSG00000227617.8	22.389	2.91	2.581	5.67e-55
CES1	ENSG00000198848.12	28.929	3.97	2.59	4.39e-31
CES2	ENSG00000172831.11	21.47	6.9	1.508	1.39e-39
CETN2	ENSG00000147400.8	45.781	8.5	2.3	8.19e-81
CETN3	ENSG00000153140.8	16.919	4.2	1.785	1.62e-65
CFAP20	ENSG00000070761.7	27.161	6.19	1.97	1.67e-75
CFAP36	ENSG00000163001.11	39.53	13.74	1.459	2.2e-55
CFAP97	ENSG00000164323.12	9.39	3.03	1.366	3.27e-42
CFB	ENSG00000243649.8	130.598	21.97	2.518	2.23e-24
CFDP1	ENSG00000153774.8	66.939	19.07	1.759	3.63e-58
CFH	ENSG00000000971.15	51.349	3.49	3.543	6.14e-62
CFI	ENSG00000205403.12	58.169	13.36	2.043	3.95e-29
CFL1	ENSG00000172757.12	1120.63	94.398	3.555	1.28e-79
CFLAR	ENSG00000003402.19	51.789	14.86	1.735	3.12e-36
CFP	ENSG00000126759.12	2.87	0.52	1.348	1.12e-28
CGB5	ENSG00000189052.6	3.74	0	2.245	8.67e-20
CGB8	ENSG00000213030.5	1.86	0	1.516	6.29e-21
CGGBP1	ENSG00000163320.10	24.18	10.89	1.082	3.15e-29
CGN	ENSG00000143375.14	39.129	18.64	1.031	7.36e-09
CGREF1	ENSG00000138028.14	7.55	0.71	2.322	6.03e-59
CGRRF1	ENSG00000100532.11	11.78	5.2	1.044	7.36e-40
CH17-13I23.3	ENSG00000277702.1	3.85	0.8	1.43	1.96e-30
CH17-340M24.3	ENSG00000197180.2	8.66	2.07	1.654	8.51e-58
CH17-360D5.2	ENSG00000276850.4	5.41	0.03	2.638	2.83e-53
CH17-360D5.3	ENSG00000273760.1	1.85	0	1.511	1.07e-34
CH25H	ENSG00000138135.6	3.77	0.34	1.832	4.18e-40
CH507-152C13.1	ENSG00000275895.4	63.451	18.57	1.72	3.29e-56
CH507-338C24.1	ENSG00000277991.4	0.17	1.48	-1.084	1.33e-12
CH507-42P11.8	ENSG00000275993.2	18.301	7.03	1.265	1.1e-07
CH507-513H4.1	ENSG00000278996.1	2.92	0.39	1.496	1.79e-59
CH507-513H4.5	ENSG00000281383.1	3.5	0.43	1.654	4.15e-32
CH507-528H12.1	ENSG00000280441.2	2.92	0.39	1.496	1.79e-59
CH507-9B2.3	ENSG00000280071.3	47.038	21.201	1.114	5.16e-23
CH507-9B2.5	ENSG00000275464.3	9.37	3.51	1.201	5.71e-24
CH507-9B2.9	ENSG00000280433.1	5.84	2.23	1.082	1.05e-37
CHAD	ENSG00000136457.9	0.6	8.93	-2.634	2.74e-60
CHAF1A	ENSG00000167670.15	6.38	1.79	1.403	6.43e-51
CHCHD1	ENSG00000172586.7	46.202	11.44	1.924	1.76e-71
CHCHD10	ENSG00000250479.8	119.701	43.03	1.455	1.85e-32
CHCHD2	ENSG00000106153.12	291.529	114.777	1.337	5.05e-30
CHCHD3	ENSG00000106554.11	33.929	8.37	1.898	1.75e-71
CHCHD4	ENSG00000163528.12	9.07	3.69	1.102	1.38e-52
CHCHD6	ENSG00000159685.10	14.54	4.96	1.383	2.56e-58
CHCHD7	ENSG00000170791.17	28.34	11.84	1.192	3.05e-40
CHD1L	ENSG00000131778.17	17.289	5.8	1.427	2.23e-47
CHD3	ENSG00000170004.16	53.131	25.93	1.007	5.66e-20
CHD4	ENSG00000111642.14	93.098	27.611	1.718	2.14e-55
CHD8	ENSG00000100888.12	26.661	7.7	1.669	3.75e-64
CHD9	ENSG00000177200.15	9.29	3.67	1.14	5.37e-43
CHEK1	ENSG00000149554.12	4.41	0.83	1.564	1.48e-60
CHEK2	ENSG00000183765.20	6.66	1.37	1.692	2.45e-53
CHGB	ENSG00000089199.9	39.42	12.57	1.575	1.34e-08
CHI3L1	ENSG00000133048.12	16.04	4.93	1.523	4.8e-08
CHI3L2	ENSG00000064886.13	2.18	0.22	1.382	6.67e-28
CHIC1	ENSG00000204116.11	2.73	0.84	1.019	7.13e-44
CHIC2	ENSG00000109220.10	19.95	3.67	2.165	1.71e-78
CHIT1	ENSG00000133063.15	5.46	0.13	2.515	3.92e-26
CHM	ENSG00000188419.13	6.91	2.18	1.315	5.91e-61
CHML	ENSG00000203668.1	2.44	0.65	1.06	1.35e-39
CHMP1A	ENSG00000131165.14	72.138	17.629	1.973	1.61e-60
CHMP1B	ENSG00000255112.2	32.61	6.37	2.189	4.04e-76
CHMP2A	ENSG00000130724.8	191.035	47.33	1.99	1.45e-61
CHMP2B	ENSG00000083937.8	33.651	10.08	1.645	2.27e-48
CHMP3	ENSG00000115561.14	75.499	32.96	1.172	1.68e-36
CHMP4A	ENSG00000254505.8	75.583	27.549	1.424	1.15e-39
CHMP4B	ENSG00000101421.3	174.03	30.399	2.479	5.79e-75
CHMP4C	ENSG00000164695.4	16.82	7.3	1.102	6.55e-18
CHMP5	ENSG00000086065.13	62.469	12.85	2.196	2.72e-68
CHMP6	ENSG00000176108.9	19.03	7.28	1.275	1.05e-45
CHMP7	ENSG00000147457.13	23.15	7.54	1.5	8.41e-56
CHN1	ENSG00000128656.13	10.87	1.42	2.294	8.98e-57
CHORDC1	ENSG00000110172.11	13.85	5.5	1.192	6.39e-31
CHP1	ENSG00000187446.11	55.322	15.04	1.812	8.65e-50
CHPF	ENSG00000123989.13	100.74	46.6	1.096	7.79e-22
CHPF2	ENSG00000033100.14	32.26	9.44	1.672	3.01e-65
CHPT1	ENSG00000111666.10	29.66	9.13	1.598	1.03e-29
CHRAC1	ENSG00000104472.9	20.559	5.56	1.717	4.25e-60
CHRD	ENSG00000090539.15	4.34	12.17	-1.302	2.91e-20
CHRDL2	ENSG00000054938.15	2.9	0.71	1.19	3.28e-14
CHRM3	ENSG00000133019.11	0.89	3.49	-1.248	3.06e-34
CHRNA5	ENSG00000169684.13	4.29	0.64	1.69	3.51e-44
CHST1	ENSG00000175264.7	3.89	0.5	1.705	8.51e-45
CHST10	ENSG00000115526.10	4.13	1.52	1.026	2.09e-32
CHST11	ENSG00000171310.10	11.08	1.24	2.431	2.52e-48
CHST12	ENSG00000136213.9	10.12	4.54	1.005	2.64e-37
CHST14	ENSG00000169105.7	17.12	3	2.18	8.11e-76
CHST15	ENSG00000182022.17	11.94	3.41	1.553	1.71e-33
CHST2	ENSG00000175040.5	2.05	0.43	1.093	8.67e-39
CHST3	ENSG00000122863.5	6.07	1.54	1.477	1.07e-35
CHST4	ENSG00000140835.9	10.51	1.74	2.071	5.59e-20
CHSY1	ENSG00000131873.5	15.54	2.05	2.439	7.35e-66
CHSY3	ENSG00000198108.3	1.64	0.11	1.25	3.51e-46
CHTF18	ENSG00000127586.16	7.71	3.29	1.022	1.35e-12
CHTF8	ENSG00000168802.12	58.899	19.86	1.522	1.9e-54
CHUK	ENSG00000213341.10	8.63	3.65	1.05	1.99e-44
CHURC1	ENSG00000258289.7	39.711	11.48	1.706	9.44e-57
CIAPIN1	ENSG00000005194.14	29.79	9.99	1.486	2.15e-30
CIART	ENSG00000159208.15	5.52	1.43	1.424	2.52e-35
CIB1	ENSG00000185043.10	166.767	79.721	1.055	4.42e-19
CIB2	ENSG00000136425.12	5.97	2.2	1.123	1.56e-33
CIDEC	ENSG00000187288.10	5.06	0.49	2.024	1.74e-20
CIDECP	ENSG00000186162.10	10.33	2.78	1.584	5.16e-66
CIITA	ENSG00000179583.17	7.1	0.88	2.107	1.54e-35
CILP	ENSG00000138615.5	4.23	0.95	1.423	4.09e-18
CILP2	ENSG00000160161.9	2.53	0.02	1.791	4.24e-46
CIPC	ENSG00000198894.7	7.7	2.88	1.165	1.33e-42
CIR1	ENSG00000138433.15	26.051	10.6	1.222	3.54e-42
CIRH1A	ENSG00000141076.17	20.51	9.69	1.009	1.81e-30
CISD1	ENSG00000122873.11	27.789	6.99	1.849	4.29e-73
CISD2	ENSG00000145354.9	20.52	7.36	1.364	2.77e-55
CIT	ENSG00000122966.13	2.38	0.37	1.303	8.61e-41
CKAP2	ENSG00000136108.14	5.71	0.59	2.077	3.6e-74
CKAP2L	ENSG00000169607.12	1.58	0.03	1.325	7.44e-51
CKAP4	ENSG00000136026.13	51.538	13.75	1.833	8.8e-60
CKAP5	ENSG00000175216.14	24.11	5.91	1.861	4e-60
CKB	ENSG00000166165.12	104.162	36.471	1.489	5.52e-25
CKLF	ENSG00000217555.12	91.113	7.03	3.52	4.7e-89
CKLF-CMTM1	ENSG00000254788.6	2.93	0.28	1.618	2.82e-58
CKM	ENSG00000104879.4	0.11	1.42	-1.124	9.98e-21
CKMT1A	ENSG00000223572.9	19.99	1.7	2.959	5.27e-55
CKMT1B	ENSG00000237289.9	20.06	1.58	3.029	1.35e-56
CKS1B	ENSG00000173207.12	71.848	8.32	2.966	1.27e-74
CKS1BP3	ENSG00000268942.2	5.69	0	2.742	6.33e-63
CKS2	ENSG00000123975.4	38.569	1.47	4.002	1.56e-91
CLCF1	ENSG00000175505.10	11.9	2.19	2.016	6.06e-38
CLCN3	ENSG00000109572.13	23.789	8.19	1.432	2.53e-44
CLCN4	ENSG00000073464.11	2.15	0.31	1.266	6.48e-55
CLCNKA	ENSG00000186510.11	0.23	1.76	-1.166	1.25e-40
CLDN1	ENSG00000163347.5	44.699	10.59	1.979	5.41e-22
CLDN11	ENSG00000013297.10	7.1	0.48	2.452	1.63e-52
CLDN12	ENSG00000157224.15	24.271	7.12	1.638	9.94e-44
CLDN15	ENSG00000106404.13	7.75	3.3	1.025	2.27e-15
CLDN18	ENSG00000066405.12	60.429	0.12	5.777	1.05e-34
CLDN2	ENSG00000165376.10	39.829	2.29	3.633	2.4e-27
CLDN23	ENSG00000253958.1	10.29	1.32	2.283	1.23e-40
CLDN4	ENSG00000189143.9	279.75	41.671	2.718	2.59e-34
CLDN5	ENSG00000184113.9	19.83	5.05	1.784	1.63e-20
CLDN7	ENSG00000181885.18	133.379	41.32	1.667	3.45e-26
CLDND1	ENSG00000080822.16	40.5	13.69	1.498	2.03e-42
CLEC10A	ENSG00000132514.13	3.11	0.39	1.564	3.34e-28
CLEC11A	ENSG00000105472.12	26.099	2.47	2.965	2.41e-65
CLEC12A	ENSG00000172322.13	1.63	0.2	1.132	1.82e-18
CLEC14A	ENSG00000176435.6	11.78	2.77	1.761	5.91e-46
CLEC16A	ENSG00000038532.14	9.93	2.99	1.454	5.06e-50
CLEC2B	ENSG00000110852.4	10.32	0.97	2.523	1.69e-53
CLEC2D	ENSG00000069493.14	4.52	1.48	1.154	4.86e-23
CLEC3B	ENSG00000163815.5	12.17	4.17	1.349	2.47e-21
CLEC4A	ENSG00000111729.12	4.68	0.95	1.542	1.81e-38
CLEC4E	ENSG00000166523.7	3.11	0.44	1.513	5.44e-21
CLEC5A	ENSG00000258227.6	2.88	0.47	1.4	3.8e-26
CLEC7A	ENSG00000172243.17	6.41	1.11	1.812	1.98e-15
CLIC1	ENSG00000213719.8	596.632	55.422	3.405	4.22e-74
CLIC2	ENSG00000155962.12	6.49	1.01	1.898	1.25e-39
CLIC3	ENSG00000169583.12	24.421	0.3	4.289	1.26e-53
CLIC4	ENSG00000169504.14	49.428	9.56	2.256	5.15e-44
CLIC5	ENSG00000112782.15	2.99	0.4	1.511	6.16e-37
CLIC6	ENSG00000159212.12	5.07	1.04	1.573	3.79e-32
CLINT1	ENSG00000113282.13	57.241	19.91	1.478	2.99e-36
CLIP1	ENSG00000130779.19	18.181	7.81	1.122	2.39e-33
CLIP2	ENSG00000106665.15	18.491	6.81	1.319	3.52e-49
CLIP3	ENSG00000105270.14	9.21	1.23	2.195	1.83e-53
CLIP4	ENSG00000115295.19	9.81	2.89	1.475	3.87e-37
CLK3	ENSG00000179335.18	43.961	17.34	1.294	2.36e-35
CLMP	ENSG00000166250.11	5.24	0.7	1.876	4.9e-33
CLN5	ENSG00000102805.13	18.371	7.22	1.237	1.36e-49
CLN6	ENSG00000128973.11	25.91	8.8	1.457	6.91e-53
CLN8	ENSG00000182372.7	7.37	3.13	1.019	3.42e-38
CLNS1A	ENSG00000074201.8	79.148	38.991	1.003	5.81e-28
CLOCK	ENSG00000134852.14	5.8	1.8	1.28	8.58e-55
CLP1	ENSG00000172409.5	8.38	2.76	1.319	7.22e-56
CLPP	ENSG00000125656.8	56.39	21.88	1.327	1.12e-44
CLPS	ENSG00000137392.9	20.97	38160.7	-10.762	1.46e-48
CLPSL1	ENSG00000204140.9	0.11	44.6	-5.36	2.08e-25
CLPSL2	ENSG00000196748.9	0.11	1.79	-1.33	1.04e-38
CLPTM1	ENSG00000104853.15	73.94	30.999	1.228	4.2e-37
CLPTM1L	ENSG00000049656.13	108.993	47.712	1.175	5.48e-38
CLRN3	ENSG00000180745.4	8.07	0.05	3.111	6.06e-48
CLSTN1	ENSG00000171603.16	97.321	29.1	1.708	1.21e-55
CLSTN3	ENSG00000139182.13	24.14	6.93	1.665	1.78e-42
CLTA	ENSG00000122705.16	164.859	64.78	1.334	1.19e-36
CLTB	ENSG00000175416.12	208.976	26.29	2.944	1.91e-68
CLTC	ENSG00000141367.11	115.824	23.94	2.228	2.05e-75
CLUAP1	ENSG00000103351.12	15.99	4.94	1.516	1.17e-60
CMAHP	ENSG00000168405.14	9.21	2.55	1.524	4.83e-24
CMAS	ENSG00000111726.12	27.331	11.48	1.183	2.74e-38
CMB9-94B1.2	ENSG00000276505.1	0.49	3.89	-1.714	1.8e-42
CMBL	ENSG00000164237.8	24.401	6.3	1.799	1.55e-49
CMC1	ENSG00000187118.12	28.709	11.72	1.224	1.69e-43
CMC2	ENSG00000103121.8	54.209	16.919	1.623	9.41e-61
CMIP	ENSG00000153815.16	39.069	5.83	2.553	2.28e-67
CMKLR1	ENSG00000174600.13	3.31	0.91	1.174	6.73e-22
CMPK1	ENSG00000162368.13	95.649	26.051	1.837	9.68e-51
CMPK2	ENSG00000134326.11	5.5	1.42	1.425	8.33e-30
CMTM1	ENSG00000089505.17	2.08	0.19	1.372	1.45e-53
CMTM3	ENSG00000140931.19	56.759	2.42	4.078	8.85e-75
CMTM6	ENSG00000091317.7	43.17	6.12	2.633	1.23e-74
CMTM7	ENSG00000153551.13	50.07	8.25	2.465	4.02e-47
CMTR2	ENSG00000180917.16	8.13	3.55	1.005	7.89e-31
CNDP2	ENSG00000133313.14	102.018	39.461	1.348	8.92e-35
CNFN	ENSG00000105427.9	2.93	0.83	1.103	4.73e-19
CNIH1	ENSG00000100528.11	81.007	18.15	2.098	2.02e-68
CNIH4	ENSG00000143771.11	42.25	7.45	2.356	1.97e-69
CNN1	ENSG00000130176.7	28.689	2.22	3.205	3.7e-41
CNN2	ENSG00000064666.14	131.433	26.779	2.253	2.61e-37
CNN3	ENSG00000117519.15	94.431	27.05	1.766	2.31e-32
CNNM4	ENSG00000158158.11	9	2.67	1.446	1.03e-41
CNOT1	ENSG00000125107.16	95.649	35.971	1.386	1.6e-47
CNOT10	ENSG00000182973.18	15.8	6.99	1.072	1.1e-39
CNOT11	ENSG00000158435.7	28.249	12.67	1.097	1.68e-33
CNOT2	ENSG00000111596.11	27.45	11.11	1.232	1.91e-42
CNOT4	ENSG00000080802.18	7.46	2.69	1.197	2.96e-58
CNOT6	ENSG00000113300.11	7.55	1.98	1.521	7.09e-63
CNOT6L	ENSG00000138767.12	7.14	2.72	1.13	1.36e-36
CNOT7	ENSG00000198791.11	25.029	11.11	1.104	3.54e-33
CNOT8	ENSG00000155508.13	31.97	8.38	1.814	3.16e-63
CNP	ENSG00000173786.16	49.48	11.34	2.032	5.84e-74
CNPPD1	ENSG00000115649.15	49.23	20.659	1.214	1.03e-33
CNPY2	ENSG00000257727.5	124.43	55.26	1.157	7.38e-38
CNPY4	ENSG00000166997.7	14.96	1.94	2.441	5.05e-76
CNRIP1	ENSG00000119865.8	8.56	1.49	1.941	2.69e-47
CNST	ENSG00000162852.13	6.16	2.28	1.126	2.75e-45
CNTN1	ENSG00000018236.14	5.76	0.57	2.106	1.16e-41
COA4	ENSG00000181924.6	58.44	18.5	1.608	2.22e-55
COA5	ENSG00000183513.8	25.27	12.1	1.004	1.5e-30
COA6	ENSG00000168275.14	32.421	6.83	2.094	1.23e-76
COA7	ENSG00000162377.5	5.96	2.12	1.158	7.23e-51
COCH	ENSG00000100473.15	1.47	9.69	-2.114	7.84e-24
COG2	ENSG00000135775.13	14.82	6.31	1.114	2.73e-41
COG4	ENSG00000103051.18	33.109	8.71	1.813	9.35e-60
COG7	ENSG00000168434.12	17.3	6.78	1.234	6.45e-35
COIL	ENSG00000121058.4	7.51	3.2	1.019	1.29e-50
COL10A1	ENSG00000123500.9	78.569	0.07	6.217	3.5e-71
COL11A1	ENSG00000060718.18	30.6	0.13	4.806	6.14e-54
COL12A1	ENSG00000111799.20	52.189	1.94	4.177	8.34e-65
COL13A1	ENSG00000197467.13	4.06	0.63	1.634	6.55e-49
COL14A1	ENSG00000187955.11	25.91	1.56	3.394	5.57e-53
COL15A1	ENSG00000204291.10	30.879	5.37	2.323	1.41e-39
COL16A1	ENSG00000084636.17	62.081	4.77	3.451	1.57e-61
COL17A1	ENSG00000065618.16	62.141	0.08	5.869	4.97e-57
COL18A1	ENSG00000182871.14	108.277	38.521	1.467	1.13e-21
COL1A1	ENSG00000108821.13	1201.65	12.61	6.465	1.71e-77
COL1A2	ENSG00000164692.17	1166.36	18.25	5.922	2.74e-77
COL22A1	ENSG00000169436.16	4.49	0.1	2.319	6.79e-46
COL28A1	ENSG00000215018.9	0.8	3.73	-1.394	7.06e-17
COL3A1	ENSG00000168542.12	1103.06	13.04	6.297	9.29e-78
COL4A1	ENSG00000187498.14	129.624	9.91	3.582	5.27e-64
COL4A2	ENSG00000134871.17	163.516	13.06	3.549	1.04e-66
COL4A3BP	ENSG00000113163.15	11.56	3.96	1.34	3.31e-47
COL4A5	ENSG00000188153.12	3.04	0.61	1.327	4.51e-34
COL5A1	ENSG00000130635.15	115.936	2.59	5.026	1.56e-74
COL5A2	ENSG00000204262.11	71.61	1.71	4.744	6.94e-77
COL5A3	ENSG00000080573.6	6.03	1.92	1.268	1.25e-21
COL6A1	ENSG00000142156.14	179.955	35.779	2.299	8.52e-36
COL6A2	ENSG00000142173.14	277.798	30.049	3.167	8.45e-51
COL6A3	ENSG00000163359.15	188.118	12.97	3.759	1e-44
COL7A1	ENSG00000114270.15	19.26	0.83	3.469	2.34e-49
COL8A1	ENSG00000144810.15	25.989	0.34	4.332	3.26e-68
COL8A2	ENSG00000171812.10	9.66	0.25	3.092	8.74e-62
COL9A2	ENSG00000049089.13	7.89	0.9	2.226	3.22e-42
COLCA1	ENSG00000196167.9	4.85	1.3	1.347	1.61e-30
COLCA2	ENSG00000214290.7	7.99	2.6	1.32	4.71e-23
COLEC11	ENSG00000118004.17	12.58	5.13	1.148	1.31e-11
COLEC12	ENSG00000158270.11	4.35	0.58	1.76	9.96e-36
COLGALT1	ENSG00000130309.10	50.509	11.31	2.065	2.67e-51
COMMD1	ENSG00000173163.10	40.791	10.66	1.842	4.36e-73
COMMD2	ENSG00000114744.8	12.28	4.38	1.304	2.23e-45
COMMD4	ENSG00000140365.15	84.729	20.75	1.979	1.13e-64
COMMD5	ENSG00000170619.9	26.259	6.6	1.843	3.22e-72
COMMD6	ENSG00000188243.12	214.866	53.899	1.975	1.78e-56
COMMD7	ENSG00000149600.11	52.61	15.13	1.733	1.7e-64
COMMD8	ENSG00000169019.10	10.93	3.47	1.416	1.55e-54
COMMD9	ENSG00000110442.11	51.399	15.24	1.69	1.64e-59
COMP	ENSG00000105664.10	69.888	0.75	5.34	6.25e-64
COMT	ENSG00000093010.11	144.867	33.481	2.081	2.07e-57
COMTD1	ENSG00000165644.10	29.421	65.612	-1.131	5.84e-21
COPA	ENSG00000122218.14	59.128	19.84	1.529	1.06e-49
COPB1	ENSG00000129083.12	55.749	23.94	1.186	3.5e-42
COPE	ENSG00000105669.12	147.737	60.392	1.277	2.31e-35
COPG1	ENSG00000181789.14	144.998	61.371	1.227	5.4e-36
COPG2	ENSG00000158623.14	13.27	3.64	1.621	3.36e-38
COPRS	ENSG00000172301.10	40.649	15.65	1.323	2.66e-48
COPS2	ENSG00000166200.14	30.271	13.1	1.149	8.43e-30
COPS4	ENSG00000138663.8	22.04	8.7	1.248	1.55e-51
COPS5	ENSG00000121022.13	41.46	18.24	1.142	2.69e-35
COPS6	ENSG00000168090.9	101.033	29.881	1.724	1.91e-62
COPS7A	ENSG00000111652.9	54.53	17.421	1.592	2.45e-55
COPS8	ENSG00000198612.10	39.871	8.03	2.178	2.01e-68
COPZ2	ENSG00000005243.9	31.71	7.45	1.953	4.79e-42
COQ10B	ENSG00000115520.8	18.911	4.47	1.864	1.32e-70
COQ2	ENSG00000173085.13	7.16	1.99	1.448	3.59e-63
COQ5	ENSG00000110871.14	18.71	8.06	1.121	7.64e-46
COQ6	ENSG00000119723.15	15.26	6.39	1.138	1.86e-40
COQ7	ENSG00000167186.10	10.45	3.73	1.275	5.13e-57
CORIN	ENSG00000145244.11	2.53	0.16	1.606	1.1e-42
CORO1A	ENSG00000102879.15	33.55	3.72	2.872	1.62e-44
CORO1B	ENSG00000172725.13	87.099	25.321	1.743	2.6e-47
CORO1C	ENSG00000110880.10	38.66	5.31	2.652	4.35e-67
CORO2A	ENSG00000106789.12	12.61	0.12	3.603	1.42e-82
CORO7	ENSG00000262246.5	22.15	6.54	1.618	1.88e-43
COTL1	ENSG00000103187.7	161.892	9.41	3.968	3.02e-82
COX14	ENSG00000178449.8	64.879	18.939	1.724	1.67e-57
COX15	ENSG00000014919.12	16.61	6.97	1.144	3.36e-40
COX16	ENSG00000133983.14	50.45	18.45	1.403	1.05e-53
COX17	ENSG00000138495.6	80.918	22.49	1.802	1.95e-63
COX20	ENSG00000203667.9	37.239	12.62	1.489	2.29e-45
COX4I1	ENSG00000131143.8	633.806	193.42	1.707	8.9e-43
COX4I2	ENSG00000131055.4	4.34	0.95	1.453	5.31e-42
COX5B	ENSG00000135940.6	179.656	64.23	1.47	3.6e-37
COX6A1	ENSG00000111775.2	399.346	119.411	1.733	7.13e-47
COX6B1	ENSG00000126267.8	346.785	80.37	2.096	1.97e-60
COX6B2	ENSG00000160471.12	3.69	0.09	2.105	1.9e-31
COX6C	ENSG00000164919.10	283.223	82.292	1.771	7.69e-50
COX7A1	ENSG00000161281.10	52.138	10.15	2.253	3e-46
COX7A2	ENSG00000112695.11	280.507	65.018	2.092	4.82e-62
COX7A2L	ENSG00000115944.14	96.448	32.09	1.558	1.47e-52
COX7B	ENSG00000131174.4	121.237	21.67	2.431	1.22e-76
COX7C	ENSG00000127184.10	670.037	239.286	1.482	1.13e-37
COX7CP1	ENSG00000235957.1	0	1.89	-1.531	3.86e-16
COX8A	ENSG00000176340.3	358.939	100.321	1.829	3.94e-48
CP	ENSG00000047457.13	21.591	1.23	3.341	3.77e-25
CPA1	ENSG00000091704.9	28.45	34590.8	-10.198	4.04e-44
CPA2	ENSG00000158516.11	11.04	6821.62	-9.146	1.95e-45
CPA3	ENSG00000163751.3	11.64	3.48	1.496	7.86e-23
CPA4	ENSG00000128510.10	0.39	6.09	-2.351	1.89e-50
CPB1	ENSG00000153002.11	40.419	15875.3	-8.582	1.35e-36
CPD	ENSG00000108582.11	22.32	4.43	2.103	6.89e-69
CPE	ENSG00000109472.13	74.972	20.49	1.822	1.63e-26
CPEB2	ENSG00000137449.15	4.6	1.75	1.026	3.96e-31
CPED1	ENSG00000106034.17	4.33	0.42	1.908	6.34e-40
CPM	ENSG00000135678.11	10.62	2.27	1.829	2.32e-36
CPNE1	ENSG00000214078.11	127.071	45.6	1.459	1.73e-30
CPNE2	ENSG00000140848.16	23.769	5.06	2.031	1.68e-55
CPNE3	ENSG00000085719.11	22.42	8.93	1.238	6.06e-37
CPNE5	ENSG00000124772.11	3.13	0.25	1.724	5.63e-43
CPNE7	ENSG00000178773.14	5.43	0.54	2.062	3.12e-40
CPNE8	ENSG00000139117.13	6.16	1.45	1.547	2.45e-45
CPOX	ENSG00000080819.6	9	3.54	1.139	2.2e-38
CPPED1	ENSG00000103381.11	8.69	1.14	2.179	8.9e-71
CPQ	ENSG00000104324.15	30.939	9.69	1.579	3.9e-43
CPSF2	ENSG00000165934.12	14.77	3.99	1.66	5.3e-52
CPSF3	ENSG00000119203.13	18.56	5.12	1.676	1.33e-66
CPSF6	ENSG00000111605.16	22.15	9.21	1.181	4.58e-41
CPT1A	ENSG00000110090.12	18.04	7.26	1.205	8.98e-33
CPT1C	ENSG00000169169.14	8.26	1.21	2.067	3.58e-48
CPTP	ENSG00000224051.6	17.14	6.92	1.196	1.2e-28
CPVL	ENSG00000106066.13	31.89	2.51	3.228	2.97e-53
CPXM1	ENSG00000088882.7	17.19	0.76	3.37	3.38e-55
CPXM2	ENSG00000121898.12	11.19	0.94	2.652	6.96e-51
CPZ	ENSG00000109625.18	16.979	0.39	3.693	4.65e-76
CRABP2	ENSG00000143320.8	50.369	0.87	4.78	7.49e-63
CRACR2B	ENSG00000177685.16	40.861	119.46	-1.525	1.02e-21
CRCP	ENSG00000241258.6	16.44	6.14	1.288	2.11e-45
CREB1	ENSG00000118260.14	9.58	3.21	1.329	2.31e-41
CREB3	ENSG00000107175.10	40.029	14.92	1.366	2.68e-39
CREB3L1	ENSG00000157613.10	64.11	27.57	1.188	1.26e-07
CREB3L2	ENSG00000182158.14	16.34	5.83	1.344	1.87e-45
CREBL2	ENSG00000111269.2	21.651	6.33	1.628	2.21e-55
CREG1	ENSG00000143162.7	67.822	25.91	1.355	1.49e-38
CREG2	ENSG00000175874.9	2.2	0.04	1.622	5.64e-46
CRELD1	ENSG00000163703.17	29.811	13.51	1.086	7.45e-20
CREM	ENSG00000095794.19	24.15	7.67	1.536	1.39e-42
CRIM1	ENSG00000150938.9	19.99	3.68	2.165	8.47e-56
CRIP1	ENSG00000213145.9	528.074	5.46	6.356	1.55e-97
CRIP2	ENSG00000182809.10	193.702	22.68	3.04	1.22e-60
CRIPT	ENSG00000119878.5	8.75	2.15	1.63	2.84e-77
CRISP3	ENSG00000096006.11	15.401	0.35	3.603	7.38e-18
CRISPLD1	ENSG00000121005.8	3.12	0.11	1.892	2.07e-53
CRISPLD2	ENSG00000103196.11	47.629	6.81	2.638	1.81e-42
CRK	ENSG00000167193.7	20.11	7.22	1.361	3.06e-51
CRKL	ENSG00000099942.12	16.95	5.64	1.435	9.42e-54
CRLF3	ENSG00000176390.11	6.77	1.64	1.557	4.76e-55
CRLS1	ENSG00000088766.11	42.961	20.04	1.063	1.01e-33
CRMP1	ENSG00000072832.14	6.23	2.42	1.08	8.51e-19
CRNDE	ENSG00000245694.8	12.14	2.5	1.909	1.6e-29
CRNKL1	ENSG00000101343.14	18.17	3.7	2.028	9.15e-83
CROT	ENSG00000005469.11	7.14	2.27	1.316	9.49e-59
CRP	ENSG00000132693.12	35.429	3.59	2.989	3.28e-05
CRTAC1	ENSG00000095713.13	1.92	0.34	1.124	1.8e-26
CRTAP	ENSG00000170275.14	104.538	19.87	2.338	8.54e-56
CRTC2	ENSG00000160741.16	34.52	14.23	1.222	1.94e-31
CRTC3	ENSG00000140577.15	13.83	4.22	1.506	1.84e-54
CRY1	ENSG00000008405.11	9.57	4.11	1.049	1.38e-26
CRYAB	ENSG00000109846.7	37.27	15.17	1.243	2.65e-11
CRYL1	ENSG00000165475.13	32.969	14.97	1.089	1.6e-28
CRYM	ENSG00000103316.10	1.47	0.08	1.193	8.6e-38
CSDC2	ENSG00000172346.14	1.79	15.56	-2.569	2.17e-37
CSDE1	ENSG00000009307.15	157.422	69.141	1.175	7.02e-28
CSE1L	ENSG00000124207.16	24.7	7.89	1.532	3.39e-57
CSF1	ENSG00000184371.13	17.89	5.68	1.5	7.38e-27
CSF1R	ENSG00000182578.13	18.1	2.26	2.551	6.09e-40
CSF2	ENSG00000164400.5	1.2	0	1.137	1.94e-35
CSF2RA	ENSG00000198223.14	8.73	0.47	2.727	7.93e-54
CSF2RB	ENSG00000100368.13	3.88	0.4	1.801	1.92e-37
CSF3R	ENSG00000119535.17	7.61	1.58	1.739	5.93e-18
CSGALNACT1	ENSG00000147408.14	7	2.77	1.085	9.47e-27
CSGALNACT2	ENSG00000169826.7	13.08	2.54	1.992	1.11e-50
CSK	ENSG00000103653.16	46.381	8.11	2.379	5.91e-63
CSNK1A1	ENSG00000113712.16	86.677	18.17	2.193	9.4e-68
CSNK1G2	ENSG00000133275.15	41.32	17.98	1.157	2.26e-26
CSNK1G3	ENSG00000151292.17	10.87	3.42	1.425	1.03e-54
CSNK2A1	ENSG00000101266.16	31.561	11.42	1.39	5.73e-46
CSNK2B	ENSG00000204435.13	164.255	62.921	1.37	5.84e-38
CSPG4	ENSG00000173546.7	4.01	0.74	1.526	3.9e-40
CSRNP1	ENSG00000144655.14	20.031	7.55	1.298	2.2e-19
CSRNP2	ENSG00000110925.6	9.06	3.72	1.092	2.55e-38
CSRP1	ENSG00000159176.13	184.745	43.679	2.056	2.6e-47
CSRP2	ENSG00000175183.9	19.03	6.22	1.472	1.32e-28
CST1	ENSG00000170373.8	100.092	0	6.66	2.09e-68
CST2	ENSG00000170369.3	22.15	0.05	4.463	1.89e-58
CST3	ENSG00000101439.8	792.462	262.595	1.59	9.26e-36
CST4	ENSG00000101441.4	1.93	0	1.551	2.81e-34
CST6	ENSG00000175315.2	12.58	0.2	3.5	4.72e-46
CST7	ENSG00000077984.5	8.68	0.52	2.671	1.06e-51
CSTA	ENSG00000121552.3	15.5	0.99	3.052	2.03e-43
CSTB	ENSG00000160213.5	122.479	12.59	3.184	1.38e-70
CSTF2	ENSG00000101811.13	8.59	1.75	1.802	6.04e-80
CSTF2T	ENSG00000177613.8	9.91	3.69	1.218	2.58e-53
CSTF3	ENSG00000176102.11	17.33	7	1.196	2.1e-17
CTA-14H9.5	ENSG00000261353.1	4.9	0.6	1.883	8.02e-47
CTA-293F17.1	ENSG00000271133.5	3.79	1.34	1.034	3.27e-25
CTA-29F11.1	ENSG00000260708.1	6.3	2.55	1.04	6.23e-27
CTA-363E6.2	ENSG00000259925.1	1.03	0	1.021	1.37e-25
CTA-384D8.34	ENSG00000273272.1	1.11	0	1.077	1.37e-31
CTA-384D8.35	ENSG00000272666.1	2.63	0.04	1.803	4.7e-41
CTA-384D8.36	ENSG00000272821.1	7.21	3.04	1.023	2.94e-19
CTA-963H5.5	ENSG00000250318.1	4.25	0.84	1.513	6.57e-44
CTAGE5	ENSG00000150527.16	32.88	14.22	1.154	2.18e-35
CTB-113I20.2	ENSG00000271737.1	2.61	0.68	1.104	6.54e-27
CTB-131K11.1	ENSG00000266469.1	9.09	2.78	1.416	2.83e-53
CTB-191K22.5	ENSG00000267815.1	39.191	1.57	3.967	2.85e-62
CTB-193M12.5	ENSG00000280206.1	6.38	0.45	2.348	2.88e-75
CTB-31O20.3	ENSG00000267007.1	7.17	0	3.03	4.37e-36
CTB-31O20.6	ENSG00000267125.2	11.08	2.34	1.855	6.74e-17
CTB-39G8.3	ENSG00000267344.1	2.73	0.44	1.373	5.57e-24
CTB-43P18.1	ENSG00000272742.1	2.21	0.53	1.069	1.94e-31
CTB-50L17.14	ENSG00000267385.1	0.18	6.56	-2.68	7.35e-85
CTB-63M22.1	ENSG00000229119.3	82.059	30.96	1.378	1.16e-10
CTB-79E8.2	ENSG00000253445.1	2.21	0.26	1.349	8.37e-30
CTB-79E8.3	ENSG00000253683.1	0	2.64	-1.864	2.84e-26
CTBP1-AS2	ENSG00000196810.4	7.54	2.92	1.123	6.16e-36
CTBP2	ENSG00000175029.16	33.55	12.07	1.402	8.47e-36
CTBS	ENSG00000117151.12	12.62	5.1	1.159	3.83e-42
CTC-246B18.10	ENSG00000269246.1	4.04	1.13	1.243	1.04e-16
CTC-251I16.1	ENSG00000279496.1	2.3	0.39	1.247	4.86e-32
CTC-425F1.4	ENSG00000267458.1	9.59	1.01	2.397	3.06e-22
CTC-429P9.4	ENSG00000268790.5	5.06	1.35	1.367	1.14e-10
CTC-444N24.11	ENSG00000268205.1	7.48	3	1.084	1.78e-29
CTC-444N24.8	ENSG00000268713.1	4.56	1.26	1.299	1.45e-52
CTC-459F4.3	ENSG00000267575.6	4.3	1.48	1.096	1.02e-43
CTC-518B2.12	ENSG00000268739.1	2.09	0	1.628	2.25e-22
CTC-518P12.6	ENSG00000267484.1	1.76	0	1.465	3.52e-30
CTC-526N19.1	ENSG00000277013.1	0.47	3.2	-1.515	7.59e-50
CTCF	ENSG00000102974.14	19.73	6.47	1.473	3.25e-61
CTD-2008P7.9	ENSG00000267259.1	0.23	9.98	-3.158	7.8e-91
CTD-2015G9.2	ENSG00000261175.5	1.33	0	1.22	1.36e-30
CTD-2020K17.1	ENSG00000267121.5	2.21	0.57	1.032	6.99e-18
CTD-2224J9.4	ENSG00000241434.1	1.92	0	1.546	7.47e-07
CTD-2227E11.1	ENSG00000270933.1	1.4	15.41	-2.773	9.44e-59
CTD-2231E14.8	ENSG00000269243.1	36.78	7.56	2.142	1.26e-76
CTD-2245F17.3	ENSG00000269051.5	1.57	0.25	1.04	4.73e-22
CTD-2267D19.3	ENSG00000266208.1	3.99	0.9	1.393	1.09e-60
CTD-2303H24.2	ENSG00000273018.5	1.73	4.89	-1.109	1.74e-09
CTD-2336O2.1	ENSG00000253982.1	15.82	4.51	1.61	6.71e-58
CTD-2369P2.12	ENSG00000267303.1	14.91	3.01	1.988	2.14e-55
CTD-2377D24.6	ENSG00000244649.4	7.4	0	3.07	7.08e-30
CTD-2396E7.11	ENSG00000275234.1	25.96	10.6	1.217	3.07e-21
CTD-2510F5.4	ENSG00000265415.1	1.03	0	1.021	9.72e-41
CTD-2510F5.6	ENSG00000265303.1	1.29	0	1.195	7.46e-12
CTD-2540B15.11	ENSG00000267580.1	10.33	2.61	1.65	4.72e-30
CTD-2574D22.6	ENSG00000281348.1	1.19	0	1.131	2.8e-23
CTD-2626G11.2	ENSG00000268416.1	0.05	1.35	-1.162	5.58e-36
CTD-2647L4.5	ENSG00000259607.1	5.47	0.83	1.822	2.74e-10
CTD-3141N22.1	ENSG00000241069.1	2.78	0	1.918	8.22e-08
CTD-3157E16.1	ENSG00000265519.1	2.64	0.77	1.04	1.44e-26
CTD-3157E16.2	ENSG00000276855.1	11.14	3.3	1.497	5.48e-42
CTD-3214H19.16	ENSG00000269711.1	2.08	0	1.623	7.53e-15
CTD-3252C9.4	ENSG00000267519.3	18.539	2.64	2.424	1.62e-36
CTDNEP1	ENSG00000175826.11	98.598	42.949	1.18	7.88e-37
CTDSP1	ENSG00000144579.7	93.85	38.17	1.276	2.93e-31
CTDSPL	ENSG00000144677.14	24	4.74	2.123	8.5e-65
CTDSPL2	ENSG00000137770.13	7.1	2.51	1.206	5.14e-41
CTF1	ENSG00000150281.6	4.26	1.3	1.193	9.12e-35
CTGF	ENSG00000118523.5	172.804	25.029	2.739	1.05e-35
CTHRC1	ENSG00000164932.12	109.303	0.89	5.867	6.25e-82
CTIF	ENSG00000134030.13	12.65	4.88	1.215	3.65e-38
CTLA4	ENSG00000163599.14	1.15	0.04	1.048	2.1e-31
CTNNA1	ENSG00000044115.20	196.678	40.63	2.247	2.72e-59
CTNNAL1	ENSG00000119326.14	21.52	7.18	1.461	1.44e-41
CTNNB1	ENSG00000168036.16	155.319	29.84	2.342	1.01e-64
CTNNBIP1	ENSG00000178585.14	23.091	9.23	1.236	1.12e-42
CTNNBL1	ENSG00000132792.18	49.09	8.77	2.358	3.97e-84
CTNND1	ENSG00000198561.12	93.752	46.038	1.01	2.36e-15
CTNND2	ENSG00000169862.18	1.7	7.19	-1.601	2.56e-22
CTPS1	ENSG00000171793.13	13.43	4.6	1.366	5.66e-34
CTR9	ENSG00000198730.7	12.51	5.2	1.124	9.03e-45
CTRB1	ENSG00000168925.10	63.941	28700.7	-8.788	2.85e-38
CTRB2	ENSG00000168928.12	92.027	29919.5	-8.329	5.99e-37
CTRC	ENSG00000162438.11	18.83	8000.64	-8.657	3.43e-40
CTRL	ENSG00000141086.17	1.63	931.943	-8.471	1.83e-50
CTSA	ENSG00000064601.16	166.883	30.92	2.395	6.03e-68
CTSB	ENSG00000164733.20	658.664	58.012	3.483	3.46e-72
CTSC	ENSG00000109861.15	149.935	14.76	3.26	1.05e-69
CTSD	ENSG00000117984.12	819.442	129.238	2.655	3.98e-60
CTSE	ENSG00000196188.10	321.393	0.6	7.655	6.63e-66
CTSF	ENSG00000174080.10	32.951	15.76	1.018	5.62e-22
CTSH	ENSG00000103811.15	338.543	43.98	2.916	4.26e-50
CTSK	ENSG00000143387.12	122.683	3.46	4.793	4.1e-70
CTSL	ENSG00000135047.14	115.407	26.319	2.091	1.4e-47
[truncated: 7,221 more rows]

## Sheet: Table S2
Table SII. ​Prognostic genes in the TCGA-PAAD cohort obtained from UALCAN.
Gene symbol	Log_rank_P-value	High expression : Median survival	Low expression : Median survival
A2ML1	0.0083752	481	661
AADAC	0.0027073	467	684
AANAT	0.0259143	1332	593
AARSD1	0.0024477	2036	592
AATF	0.0225585	394	652
AATK	0.0267629	702	596
ABCA10	0.0410781	702	603
ABCA5	0.0058348	NA	598
ABCB4	0.0344673	1502	596
ABCE1	0.0220219	545	684
ABHD2	0.0106479	511	691
ABHD8	0.0252816	738	596
ABI1	0.0335419	532	684
ABLIM2	0.0237022	1059	593
ABO	0.0470296	476	652
ACACB	0.0005056	1502	545
ACAD10	0.0067665	2182	592
ACADVL	0.0082877	1059	592
ACBD3	0.0443855	545	684
ACIN1	0.0475854	702	596
ACOT4	0.0168886	470	661
ACR	0.0117036	1332	596
ACSL6	0.0019067	1332	545
ACTL6A	0.001048	485	695
ACTR2	0.0360855	545	684
ADAD2	0.045166	1130	596
ADAM10	0.0168205	545	661
ADAM11	0.0300223	738	593
ADAM29	0.0441892	913	596
ADAM9	0.0026861	476	666
ADAMTS12	0.040633	592	661
ADAMTS19	0.0221119	2036	596
ADAMTSL2	0.0082936	1332	596
ADC	0.0252034	684	592
ADCK2	0.0255387	1502	593
ADCY8	0.0447011	2182	598
ADD1	0.0245205	732	596
ADH1A	0.0039718	1502	568
ADK	0.0348705	486	652
ADO	0.0212283	532	691
ADORA2B	0.0158714	470	666
ADRB1	0.0028775	NA	592
ADRB2	0.0429613	1332	598
AES	0.0107742	NA	596
AFF3	0.0231112	1332	598
AFG3L1	0.008	NA	593
AGAP4	0.0378847	1059	596
AGBL1	0.0398939	485	652
AGBL3	0.0007753	NA	568
AGBL4	0.0382436	1130	596
AGPAT4	0.0162891	1502	568
AGPHD1	0.0132348	1332	592
AGXT2L2	0.0169727	1059	593
AHNAK	0.0137815	486	666
AHNAK2	0.016965	532	666
AIFM1	0.0386776	691	598
AIRE	0.015501	1130	596
AK2	0.0190133	486	652
AK3L1	0.0009154	473	684
AKAP8L	0.0175191	1059	592
AKD1	0.0043905	NA	596
ALDH1L1	0.0256397	532	652
ALDH7A1	0.0338055	545	661
ALG10	0.0191058	518	684
ALG5	0.0485966	695	596
ALK	0.0075616	1502	592
ALKBH4	0.0092361	1059	592
ALKBH7	0.0174364	1130	593
ALKBH8	0.0294276	545	661
ALLC	0.0497306	913	593
ALOX12	0.0034769	2182	593
ALPL	0.0137262	1332	593
ALPPL2	0.0040662	532	684
AMBRA1	0.0393651	532	661
AMH	0.0048842	2182	568
AMIGO2	0.0017123	460	691
AMIGO3	0.0369365	702	592
ANAPC1	0.0137536	545	661
ANAPC2	0.022907	732	596
ANAPC5	0.0118162	2036	596
ANGEL1	0.0095575	NA	593
ANGPT2	0.0157236	473	661
ANGPTL5	0.0215501	1502	598
ANK2	0.006464	1502	593
ANKFN1	0.0298905	532	666
ANKIB1	0.0109622	517	691
ANKLE1	0.0339493	NA	596
ANKRD11	0.0352024	1130	532
ANKRD13B	0.0021991	2036	568
ANKRD13C	0.0428535	545	684
ANKRD16	0.0021902	2182	568
ANKRD22	0.0324598	485	652
ANKRD23	0.0423378	2036	596
ANKRD24	0.0023271	NA	592
ANKRD28	0.0258129	518	666
ANKRD43	0.0164851	1130	592
ANKRD50	0.0095219	545	691
ANKRD52	0.0471814	691	592
ANKRD54	0.0229506	2036	596
ANKRD57	0.0098314	518	661
ANKS1B	0.0003961	NA	545
ANLN	0.0001934	393	684
ANO5	0.0161024	1332	596
ANO6	0.0468157	545	684
ANP32C	0.0282482	486	652
ANP32E	0.0166678	532	684
ANTXR2	0.0312982	518	666
ANXA2	0.0060073	460	661
ANXA2P1	0.0040586	470	691
ANXA2P2	0.0065779	458	666
ANXA2P3	0.0340141	470	652
ANXA3	0.0040209	460	691
ANXA6	0.0140231	1332	545
AP1B1	0.0214732	1059	593
AP1S3	0.0018858	511	684
AP3B2	0.0367691	1059	596
AP3D1	0.0411074	732	593
AP3S1	2.83e-05	460	695
APBA1	0.0040938	1332	568
APBA3	0.0072379	732	592
APBB1	0.0389669	1332	603
APBB3	0.0059162	NA	593
APC2	0.0005862	2182	545
APCDD1L	0.0093572	486	684
APH1B	0.0457328	702	596
APLF	0.0197601	518	666
APLP1	0.0213841	1332	596
APOB48R	0.0439784	691	593
APOBEC1	0.026049	473	652
APOBEC4	0.0040593	1059	592
APOL6	0.0195596	532	684
AQP5	0.0247039	470	652
AQP7	0.0081188	1502	593
AQR	0.0155486	518	691
ARAP2	0.0404515	518	661
ARCN1	0.0033084	517	684
AREG	0.0251281	498	684
ARFGAP1	0.0178504	738	592
ARHGAP11A	0.0013564	517	661
ARHGAP11B	0.0292569	517	652
ARHGAP18	0.0017592	486	684
ARHGAP21	0.0175286	518	661
ARHGAP23	0.0020932	460	661
ARHGAP29	0.0233387	517	652
ARHGAP32	0.0063079	458	666
ARHGAP33	0.0058822	NA	592
ARHGAP39	0.0441681	732	593
ARHGAP42	0.0062023	486	684
ARHGEF10L	0.0226843	732	593
ARHGEF15	0.0255384	1332	596
ARHGEF9	0.0031533	1332	568
ARID3A	0.009762	1130	568
ARL14	0.0029468	473	666
ARL5B	0.0465787	545	661
ARL6IP1	0.0008924	473	691
ARL6IP4	0.0079681	2036	598
ARL6IP6	0.0057991	486	666
ARMC10	0.0003288	485	738
ARMC2	0.0064571	1502	592
ARMC3	0.0195989	732	592
ARMC5	0.0002793	NA	545
ARMC6	0.0384166	732	598
ARMS2	0.0059874	2182	592
ARNT2	0.0373358	738	593
ARNTL2	1e-07	394	913
ARPC3	0.0029121	470	684
ARRDC4	0.0468928	702	603
ARSG	0.0018081	2182	545
ARVCF	0.0103487	738	593
ASAP1	0.027709	545	661
ASAP2	0.0278112	518	652
ASB16	0.0460753	1332	596
ASB3	0.024483	545	661
ASB4	0.0326995	1332	596
ASCC3	0.0407874	518	661
ASCL2	0.0010034	2036	592
ASF1B	0.0061331	460	652
ASGR1	0.0106984	NA	592
ASMTL	0.0106583	NA	593
ASNS	0.0159708	732	545
ASPH	0.0018962	473	666
ASPHD1	0.0045568	1059	568
ASPM	0.0042245	485	661
ASPSCR1	0.004159	2036	596
ASXL2	0.0360575	545	684
ATCAY	0.0463481	1332	593
ATF1	0.0324259	545	684
ATF7	0.015069	486	666
ATG12	0.0191254	518	661
ATG16L2	0.015093	738	593
ATG4D	0.0115423	1130	593
ATL2	0.0044278	486	691
ATL3	0.0125246	545	666
ATMIN	0.0204111	545	684
ATOH7	0.0289688	1130	593
ATOH8	0.0491727	NA	598
ATP11B	0.0113806	486	661
ATP13A3	0.0037938	518	661
ATP1A2	0.0231289	1502	596
ATP1A3	0.0025293	2182	593
ATP1B2	0.0004335	1502	545
ATP2A3	0.0151739	NA	596
ATP2B2	0.0177644	1332	593
ATP2C1	0.0110053	518	652
ATP6V0A1	0.0097312	1059	593
ATP6V0B	0.0343243	1059	593
ATP6V1A	0.0227629	518	684
ATP6V1G2	0.037068	1332	596
ATP7A	0.0068167	518	684
ATP8B2	0.028077	1332	593
ATP8B3	0.0422862	473	627
ATPAF2	0.0264067	738	593
ATPIF1	0.0276809	1059	596
ATR	0.0063563	518	695
ATXN1L	0.0452251	592	661
ATXN7L2	0.0498723	702	596
AURKA	0.0011594	472.5	695
AVEN	0.0227437	545	661
AVPI1	0.0255933	430	661
AZI1	0.0180229	2036	596
AZIN1	0.0035559	486	691
B3GALTL	0.0255405	592	661
B3GAT1	0.0089568	1502	596
B3GNT2	0.0004496	486	691
B3GNT3	0.0130879	470	666
B3GNT4	0.016762	473	684
B3GNT8	0.0013005	NA	596
B4GALNT4	0.0023875	2182	592
B4GALT5	0.0003009	394	695
B9D2	0.0393582	738	593
BACH1	0.0028256	486	691
BAG3	0.0392487	486	652
BAG4	0.0359229	545	684
BAI3	3.25e-05	2182	545
BAMBI	0.0318084	NA	596
BANF1	0.0152574	460	652
BAT2L1	0.0261802	1332	532
BAT5	0.0059634	NA	593
BATF2	0.0035665	470	695
BAZ1A	0.0152673	486	652
BCAM	0.0467833	1059	596
BCAP29	0.0045458	486	691
BCAR3	0.002735	470	666
BCAT1	0.0028034	481	691
BCCIP	0.0319184	486	684
BCL11A	0.0036847	2036	593
BCL2L14	0.0398269	511	627
BCORL2	0.0395407	1059	592
BDNF	0.0066901	470	634
BEND5	0.0041913	2036	593
BEX1	0.0050265	1332	593
BEX2	0.0154991	2036	596
BEX5	0.0011656	2036	593
BFAR	0.0018514	460	695
BHMT	0.0091572	1059	568
BIN1	0.0462588	702	596
BIRC5	0.000841	394	652
BLVRB	0.0026388	458	661
BMP2	0.0050428	473	666
BMP4	0.0319064	473	661
BMPER	0.0062714	1502	592
BNIP2	0.0084909	517	684
BPIL1	0.0318349	913	592
BRCA2	0.0314248	593	661
BRCC3	0.0258159	532	661
BRD7	0.0466491	518	661
BRD7P3	0.0437258	517	661
BRD8	0.030204	738	596
BRF1	7.48e-05	NA	545
BRIX1	0.0347662	517	661
BRP44L	0.0406762	1130	593
BRSK1	0.0005968	2182	592
BTBD10	0.0444318	545	661
BTBD6	0.0074508	738	532
BTBD8	0.0008775	486	732
BTNL9	0.0014901	1502	568
BUB1	0.0001887	485	695
BUB1B	0.0030612	498	684
BZRAP1	5.9e-06	NA	545
BZW1	0.0047476	486	684
C10orf111	0.0001879	2182	592
C10orf116	0.0306326	460	661
C10orf119	0.0027126	518	691
C10orf12	0.0175696	545	661
C10orf35	0.0394501	684	596
C10orf41	0.0124689	NA	596
C10orf55	0.0454394	545	652
C10orf68	0.0121407	1502	596
C10orf78	0.0090954	460	684
C10orf79	0.0057799	NA	593
C10orf99	0.0020146	486	661
C11orf1	0.0358685	481	661
C11orf49	0.0495725	684	596
C11orf54	0.0480326	518	661
C11orf57	0.023876	518	666
C11orf80	0.0362795	473	652
C11orf82	0.0058629	486	661
C11orf85	0.0238871	476	666
C12orf11	0.0025589	517	695
C12orf27	0.0416029	702	596
C12orf34	0.0087741	NA	593
C12orf36	0.0455373	518	652
C12orf41	0.0462538	1059	568
C12orf50	0.0484838	691	603
C12orf52	0.026883	732	592
C12orf57	0.0206073	NA	596
C12orf61	0.02225	2182	593
C12orf70	0.0156156	498	652
C12orf71	0.0071189	1332	592
C13orf29	0.0114924	485	661
C14orf106	0.043932	518	661
C14orf132	0.0364407	1332	596
C14orf148	0.0090742	NA	592
C14orf174	0.0139569	NA	596
C14orf178	0.0418579	684	592
C14orf180	0.0344465	1130	596
C14orf181	0.0384716	1059	598
C14orf2	0.0194719	1130	598
C14orf34	6.08e-05	378	691
C14orf68	0.0280911	695	596
C15orf17	0.0058422	NA	568
C15orf2	0.0450627	702	593
C15orf23	0.0002639	460	684
C15orf37	0.0091417	NA	593
C16orf5	0.0005936	NA	593
C16orf68	0.0290928	732	545
C16orf71	0.0449683	738	596
C16orf72	0.0082894	545	684
C16orf73	0.0343954	1059	596
C16orf74	0.0031115	458	666
C16orf75	0.0208348	517	652
C16orf79	0.0439887	702	593
C16orf87	0.0064518	545	684
C16orf93	0.0242423	1059	592
C17orf102	0.0365966	1332	596
C17orf103	0.0451017	702	545
C17orf104	0.0285319	1332	592
C17orf107	0.0087232	1332	532
C17orf108	0.0001737	NA	545
C17orf28	0.0139305	1130	593
C17orf47	0.0435109	732	596
C17orf53	0.0055783	393	652
C17orf56	0.0298829	1059	593
C17orf59	0.0093474	NA	593
C17orf65	0.0057963	NA	592
C17orf69	0.0027033	2036	568
C17orf72	0.0110451	1332	568
C17orf81	0.0305147	738	592
C17orf86	0.0133183	2182	593
C17orf89	0.0303787	2036	598
C17orf95	0.0042775	2036	593
C17orf96	0.0409019	1059	596
C18orf10	0.0100406	518	661
C18orf18	0.0240555	702	598
C18orf34	0.0053428	1502	592
C18orf54	0.0475765	592	661
C19orf20	0.0137437	NA	593
C19orf23	0.006956	1332	592
C19orf25	0.0420007	702	596
C19orf29	0.0491304	702	593
C19orf36	0.0318719	1130	593
C19orf39	0.0278457	732	596
C19orf44	0.0161914	738	545
C19orf46	0.0311029	1059	592
C19orf60	0.0051409	NA	596
C19orf63	0.0008686	2036	568
C19orf71	0.0251877	1130	593
C19orf73	0.0140934	738	596
C19orf76	0.0245551	1059	593
C1D	0.0454309	517	652
C1orf101	0.0230559	702	593
C1orf107	0.0074383	517	695
C1orf112	0.0337415	498	661
C1orf116	0.0452112	518	661
C1orf129	0.0045955	458	661
C1orf135	0.0172587	517	652
C1orf163	0.0107858	592	691
C1orf177	0.0208963	511	652
C1orf192	0.0473324	661	596
C1orf203	0.0019372	NA	596
C1orf204	0.033875	2036	596
C1orf213	0.0383947	1059	596
C1orf220	0.010592	1059	568
C1orf223	0.0226121	738	592
C1orf49	0.0452983	1130	592
C1orf55	0.032422	545	684
C1orf56	0.0263918	2182	603
C1orf64	0.0228422	1059	545
C1orf70	0.022626	2182	593
C1orf87	0.047767	702	532
C1orf88	0.0013384	NA	593
C1QL1	0.0161772	NA	598
C1QTNF1	0.0380472	1502	545
C1QTNF4	0.0043476	1130	593
C1QTNF8	0.004907	NA	592
C1QTNF9	0.0328738	1332	596
C20orf132	0.009017	1502	545
C20orf144	0.0104341	1059	568
C20orf152	0.0426433	738	593
C20orf160	0.0008535	NA	593
C20orf165	0.0296994	732	593
C20orf186	0.0054357	1502	592
C20orf194	0.0212841	1332	593
C20orf20	0.0311493	485	634
C20orf203	0.0290867	1059	592
C20orf29	0.0451553	732	598
C20orf56	0.027366	1332	598
C20orf7	0.0056967	2036	592
C20orf96	0.0031176	1130	568
C21orf128	0.035956	1332	598
C21orf2	0.0028629	NA	596
C21orf29	0.0220605	702	596
C21orf33	0.01102	NA	596
C21orf56	0.0077339	2182	593
C21orf57	0.0324174	1059	598
C21orf58	0.0285226	702	598
C21orf71	0.0020556	NA	568
C21orf90	0.0367706	1059	598
C22orf25	0.0309106	738	593
C22orf26	0.0313378	1059	592
C22orf27	0.04398	738	593
C22orf32	0.0274835	1332	603
C22orf39	0.003364	2182	596
C22orf43	0.041774	732	592
C2orf39	0.0077769	NA	592
C2orf40	0.0246098	913	593
C2orf42	0.0011772	1502	568
C2orf63	0.048775	2036	592
C2orf66	0.0121142	1502	593
C2orf70	0.0161091	1059	596
C2orf73	0.0116864	NA	596
C2orf77	0.0195001	1332	593
C2orf81	0.0039512	2036	596
C2orf84	0.0296335	702	568
C3orf15	0.0498516	NA	592
C3orf18	0.0189595	738	592
C3orf23	0.0175409	473	666
C3orf32	0.0176847	1502	596
C3orf47	0.0097803	738	592
C3orf54	0.0062707	1332	593
C3orf62	0.0012861	2182	568
C3orf71	0.0064558	NA	596
C4orf22	0.0246839	NA	596
C4orf36	0.0057998	486	684
C4orf39	0.0106362	1502	592
C4orf43	0.0020847	545	684
C4orf49	0.0416638	913	596
C5orf22	0.0262973	518	695
C5orf27	0.0252283	1502	593
C5orf49	0.0286042	2036	598
C5orf53	0.019519	1502	596
C5orf54	0.0012896	NA	592
C6orf114	0.004593	498	684
C6orf118	0.0087417	1332	596
C6orf122	0.0064064	1332	596
C6orf162	0.0345604	1332	596
C6orf163	0.0060217	2036	592
C6orf168	0.008805	2036	596
C6orf174	0.013506	2182	593
C6orf203	0.017891	2036	596
C6orf217	0.0333404	NA	598
C6orf227	0.0332159	486	652
C6orf70	0.0035918	2036	593
C6orf81	0.0017558	2036	592
C7orf10	0.0413957	545	652
C7orf26	0.0067436	1502	593
C7orf27	0.0020344	2036	592
C7orf31	0.0208499	1332	592
C7orf41	0.0043206	1502	592
C7orf43	0.0049341	NA	593
C7orf51	0.0014162	NA	593
C7orf55	0.0035981	2182	593
C7orf59	0.0198039	1059	598
C7orf63	0.0299503	2036	596
C8G	0.0138206	738	593
C8orf31	0.0121335	517	652
C8orf40	0.046863	517	666
C8orf42	0.0187016	695	598
C8orf48	0.0373969	1332	593
C8orf56	0.0062006	1332	592
C8orf79	0.0071346	NA	598
C8orf86	0.0060487	1130	568
C8ORFK29	0.0367877	702	593
C9orf123	0.0341415	1332	598
C9orf130	0.0013428	2036	593
C9orf131	0.0073779	1059	568
C9orf139	0.0132263	NA	596
C9orf169	7.15e-05	366	691
C9orf172	0.0089291	NA	593
C9orf173	0.0462007	NA	596
C9orf24	0.0012328	2182	568
C9orf25	0.0120786	2036	592
C9orf37	0.0380216	1130	596
C9orf41	0.0286791	518	691
C9orf43	0.0282836	684	598
C9orf50	0.0171309	1130	592
C9orf93	0.0085922	518	684
C9orf96	0.0179779	702	592
CA11	0.0089249	NA	607
CA12	0.0142582	545	661
CA14	0.02425	518	661
CA8	0.0001009	2036	545
CAB39	0.004535	517	691
CABC1	0.0251061	2182	596
CABP1	0.0222248	732	593
CABYR	0.0186743	1059	568
CACNA1B	0.0054179	1332	593
CACNA1C	0.0385589	1130	593
CACNA1D	0.0218913	1332	568
CACNA1F	0.0399556	473	666
CACNA1H	0.0003331	2182	545
CACNA2D2	0.0465824	702	596
CACNA2D3	0.0200769	1332	596
CACNB2	0.0181836	1332	596
CADM1	0.0173118	913	545
CADM4	0.0249938	2036	596
CADPS	0.001375	1332	568
CALB2	0.0327178	545	661
CALM2	0.0028742	460	691
CALU	0.0042801	486	684
CALY	0.0291563	1332	596
CAMK1	0.0040154	1502	593
CAMKK1	0.0011942	NA	545
CAMTA2	0.0233779	1502	593
CAND1	0.0243464	545	684
CAND2	0.0169554	1332	596
CAPN5	0.014077	473	666
CAPRIN1	0.0216002	545	691
CAPSL	0.0078468	NA	603
CASC1	0.004879	NA	592
CASC5	0.0301947	545	652
CASK	0.0038405	486	695
CASKIN1	0.0447149	NA	598
CASKIN2	0.0008224	NA	545
CASP12	0.0315137	1130	593
CASP14	0.0128311	545	661
CASP4	0.0013237	481	691
CAST	0.0001308	473	702
CATSPER1	0.0255547	473	661
CATSPER3	0.0014066	NA	568
CAV1	0.0112229	460	661
CAV2	0.0022635	394	666
CBX3	0.0097977	485	661
CBX6	0.0291682	1332	568
CBX7	0.0416237	1332	593
CBX8	0.0036499	2036	593
CC2D1A	0.0454931	732	596
CCDC106	0.0003217	2036	532
CCDC116	0.0205941	NA	593
CCDC122	0.0451357	702	568
CCDC13	0.0327982	1502	596
CCDC135	0.0331686	913	598
CCDC136	0.0219624	738	592
CCDC138	0.023411	545	661
CCDC149	0.041346	732	596
CCDC151	0.0069013	1332	593
CCDC154	0.023065	NA	596
CCDC157	0.0126003	732	592
CCDC159	0.0016985	NA	592
CCDC28B	0.0368449	1059	592
CCDC3	0.0240181	1332	596
CCDC30	0.0121593	NA	596
CCDC43	0.0318563	532	684
CCDC46	0.0447832	1332	596
CCDC48	0.0333814	2182	598
CCDC56	0.0433579	1059	596
CCDC58	0.0005759	394	684
CCDC6	0.0018592	476	695
CCDC62	9.82e-05	2036	518
CCDC64	0.0131241	738	568
CCDC64B	0.017781	466	652
CCDC65	0.0111634	NA	593
CCDC66	0.0474302	2182	593
CCDC68	0.0070712	485	691
CCDC72	0.0385601	1332	596
CCDC74B	0.0375925	2036	593
CCDC92	0.0015936	2036	568
CCDC94	0.0403517	732	596
CCDC96	0.0208666	2036	596
CCDC99	0.0127467	517	661
CCL3L3	0.0159738	913	592
CCM2	0.0493395	2036	598
CCNA1	0.0393165	1332	596
CCNA2	0.006151	473	652
CCNB1	0.0098522	473	652
CCNB2	0.0143967	485	634
CCND2	0.0026008	1502	532
CCNF	0.0177028	517	634
CCNG2	0.0041069	517	691
CCR10	0.0023476	NA	596
CCRL1	0.0018568	511	684
CCT5	0.0430064	517	652
CD109	0.0010441	460	684
CD160	0.0052718	1059	592
CD247	0.0159062	1059	593
CD2AP	0.0441467	593	634
CD300LG	0.010916	1332	593
CD320	0.0265718	NA	603
CD36	0.0010841	1502	592
CD44	0.0442216	545	661
CD59	0.0085817	473	661
CDC14C	0.0087725	518	666
CDC20	0.0012511	473	652
CDC27	0.0039714	518	691
CDC42	0.0489131	518	661
CDC42BPB	0.0445514	702	596
CDC42EP3	0.0450609	592	661
CDC45	0.0331364	485	634
CDC6	0.0334606	498	634
CDCA2	0.0012091	460	684
CDCA3	0.0059576	460	652
CDCA4	0.0189963	460	652
CDCA5	7.9e-05	393	691
CDCA8	0.001768	485	684
CDCP1	0.038378	498	652
CDH3	0.0038722	460	684
CDHR1	0.0044494	1332	592
CDHR4	0.0105153	473	684
CDK1	3.78e-05	381	691
CDK10	0.013153	1130	592
CDK2	0.0011292	473	691
CDK3	0.0086374	1059	592
CDK5RAP3	0.0192001	2036	593
CDK6	2.21e-05	460	702
CDK7	0.0008557	460	691
CDKL5	0.0449109	545	661
CDKN2AIPNL	0.0399274	NA	596
CDKN3	0.0116892	460	634
CDO1	0.048039	913	593
CDRT4	0.0043827	NA	593
CDSN	0.0007755	394	684
CDYL	0.0365269	517	691
CEACAM16	0.0484977	695	568
CEACAM19	0.0037352	2036	568
CEACAM20	0.0144401	511	661
CECR1	0.0067681	1332	532
CECR4	0.0463403	NA	596
CECR6	0.0028999	1502	568
CELF5	0.0127404	NA	593
CELF6	0.0034689	NA	596
CELSR3	0.0292599	2182	593
CEND1	0.0051412	1130	532
CENPA	0.0001317	460	695
CENPE	0.0074892	486	661
CENPF	0.003766	485	661
CENPI	0.0033981	485	695
CENPK	0.033203	486	652
CENPN	0.0010926	460	684
CENPO	0.0226711	518	652
CEP55	0.0002876	485	695
CERK	0.0207088	1332	593
CERKL	0.005305	1332	545
CETP	0.0425965	738	596
CFC1B	0.0258648	1130	596
CFLP1	0.0267424	2182	593
CGB	0.0184047	498	661
CGB7	0.0279803	498	661
CHCHD8	0.0171735	498	661
CHD3	0.018994	NA	596
CHD5	0.0155266	NA	596
CHEK1	1.52e-05	393	702
CHI3L2	0.0393596	1059	593
CHIC2	0.0171776	532	666
CHID1	0.0001831	NA	532
CHML	0.0094642	532	684
CHMP2B	0.0155733	518	661
CHMP4C	0.0330752	532	652
CHP2	0.0472877	517	634
CHPF2	0.0077124	738	592
CHRAC1	0.0460094	545	652
CHRD	0.042129	738	593
CHRNA10	0.0069506	1059	545
CHRNA4	0.0436239	913	596
CHST10	0.027641	913	545
CHST8	0.0449954	702	598
CIB1	0.0057429	473	652
CIB4	0.0489532	702	598
CIRBP	0.0058439	2182	596
CIRH1A	0.0369899	518	661
CISH	0.0241302	913	593
CIT	0.0190081	498	661
CKAP2L	0.0003225	498	695
CKB	0.0408579	2182	603
CKS2	0.0130588	485	652
CLDN15	0.0152457	1502	598
CLDN16	0.031829	518	652
CLDN9	0.0379702	1059	596
CLEC3B	0.0028648	2182	596
CLINT1	0.0072472	518	691
CLIP3	0.0014445	1502	532
CLNS1A	0.0082946	473	666
CLPTM1	0.0123871	738	592
CLPTM1L	0.0431583	691	592
CLPX	0.0252106	545	684
CLSPN	0.0169192	517	695
CLU	0.0447767	1332	603
CLUL1	0.0252875	695	593
CMPK2	0.0307835	517	661
CMTM1	0.0293806	518	661
CN5H6.4	0.002722	2036	593
CNGA3	0.0465613	666	568
CNGA4	0.0305801	1332	593
CNGB1	0.0096702	486	684
CNNM4	0.0298754	473	634
CNOT3	0.0101541	2036	592
CNTF	0.0075215	486	661
CNTFR	0.0110489	1502	593
CNTN2	0.0289376	1332	596
CNTNAP2	0.0346437	486	652
COBLL1	0.0440289	592	661
COL17A1	3.46e-05	430	691
COL25A1	0.0319629	702	545
COL28A1	0.0277024	702	596
COL2A1	0.0191585	2036	596
COL7A1	0.0172028	498	661
COLQ	0.0150391	702	593
COMMD2	0.0006519	467	691
COMT	0.0489643	498	634
COPB1	0.0209261	532	695
COPE	0.0131993	2182	598
COPS2	0.0043952	532	691
COPS5	0.0022043	394	666
COQ10A	0.000765	2036	592
COQ6	0.0286456	732	596
COQ9	0.0254692	1059	592
CORO1C	0.0323757	545	684
CORO2A	0.0425977	532	661
CORO2B	0.036741	1332	593
CORT	0.0009508	NA	593
COX4I1	0.0365733	1130	593
COX4I2	0.0474435	732	598
COX5B	0.0419249	1130	593
CPA5	0.01115	1502	592
CPLX1	0.004468	2036	593
CPLX3	0.0017066	2036	592
CPNE4	0.0486883	1332	596
CPNE8	0.0126673	518	661
CPNE9	0.0256806	1059	593
CPO	0.0132777	1502	596
CPT1B	0.0304075	1059	593
CPT1C	0.005172	1332	568
CRAT	0.0045694	NA	545
CREBL2	0.0384006	913	568
CRHBP	0.0085356	1332	593
CRHR1	0.0407667	732	596
CRIP3	0.0113643	1059	592
CRIPAK	0.0182742	732	598
CRMP1	0.0209034	913	593
CROCCL1	0.0172068	732	592
CROCCL2	0.0038439	NA	593
CRTC1	0.0048815	NA	593
CRY2	0.0167809	1332	545
CRYGS	0.0385761	1059	593
CRYM	0.0498179	666	596
CRYZ	0.0239726	532	666
CSAD	0.002372	2036	568
CSDAP1	0.0031491	486	684
CSE1L	0.005357	486	684
CSGALNACT1	0.0178344	517	652
CSNK1A1	0.0027989	486	691
CSNK1A1L	0.0110889	518	691
CSNK1D	0.0160047	1502	568
CSNK2A1P	0.0121484	518	691
CTCFL	0.0144218	486	661
CTDSPL2	0.0054836	518	684
CTNNA2	0.0317744	1332	596
CTNNB1	0.0428453	592	661
CTNND1	0.0002896	394	684
CTNND2	0.0296491	913	593
CTNS	0.0073215	702	518
CTSL2	0.0020486	470	691
CTTNBP2	0.0167137	913	568
CTTNBP2NL	0.0160085	532	691
CTU2	0.0166439	2036	592
CUEDC1	0.0366402	732	592
CUL7	0.0150832	732	592
CUL9	0.0028416	1059	545
CUX2	0.0055912	1332	593
CWC27	0.0030958	486	691
CWH43	0.0068456	486	661
CXADR	0.0124327	518	695
CXCL10	0.0002102	486	666
CXorf1	0.0304793	738	592
CXorf42	0.0174105	NA	592
CXorf57	0.038534	1332	568
CYB561D1	0.0056922	1332	532
CYB5D2	0.0185745	1502	593
CYFIP2	0.0032102	1332	593
CYP26A1	0.0419205	498	666
CYP2C8	0.0265522	1059	596
CYP46A1	0.0013759	NA	593
CYTSB	0.029578	545	661
CYYR1	0.0359556	1332	593
D4S234E	0.0296041	1130	603
DAAM1	0.0324552	518	684
DACT2	0.0043545	2036	592
DARS	0.0478076	545	652
DBC1	0.0004734	1502	532
DBF4	0.0080295	517	684
DCAF4L1	0.0414576	1059	568
DCAF5	0.0391256	732	568
DCBLD2	0.0037934	460	666
DCDC2B	0.0195929	1502	592
DCHS2	0.0242764	1130	596
DCLK2	0.0091284	2182	592
DCST1	0.0054054	458	661
DCT	0.005182	1502	568
DCTN3	0.0107634	NA	596
DCTPP1	0.0040593	518	695
DCUN1D1	0.0137803	518	691
DCUN1D2	0.0074869	2036	592
DCX	0.0265324	1332	596
DCXR	0.0042882	2036	593
DDC	0.0150474	1332	593
DDI2	0.0035995	518	695
DDIT4	0.0207129	421	652
DDRGK1	0.0049624	1130	593
DDX1	0.0322923	532	691
DDX10	0.0116702	486	666
DDX18	0.0231756	545	661
DDX21	0.0019097	517	691
DDX47	0.0487362	517	661
DDX51	0.0030192	2182	592
DDX52	0.0243894	532	661
DDX60	0.0007908	473	702
DDX60L	0.0125125	486	702
DEFB1	0.0049323	430	666
DEK	0.0218931	518	661
DENND1A	0.0050794	2036	545
DENND2A	0.0424124	738	593
DENND2C	0.0006766	486	691
DENND2D	0.0416395	511	634
DEPDC1	0.0003553	485	684
DEPDC1B	0.0221837	485	684
DEPDC5	0.0045335	2036	593
DFNB31	0.0009297	2036	545
DGCR6L	0.0314824	2036	598
DGCR8	0.0441456	732	593
DGKH	0.0360212	592	661
DGKZ	0.0238825	702	592
DHH	0.0123581	NA	593
DHRS13	0.0050105	2036	592
DHRS4	0.0081495	NA	596
DHRS9	0.0106298	470	661
DHRSX	0.00457	1130	592
DHX15	0.004709	486	661
DHX30	0.042211	702	596
DIAPH3	0.0034613	394	661
DIO3OS	0.0132088	473	661
DIRAS1	0.003601	NA	568
DIRAS3	0.0293359	1332	596
DIS3	0.0483982	545	684
DKFZp779M0652	0.0441849	NA	598
DKK1	0.0030378	473	661
DLAT	0.0054479	486	691
DLEU2	0.0355241	485	634
DLG1	0.0480096	518	661
DLGAP1	0.0126741	1130	596
DLGAP2	0.0251022	1502	596
DLGAP3	0.0112546	702	593
DLGAP5	0.0008443	473	695
DLL1	0.0401079	738	596
DLL3	0.005405	1332	592
DLX2	0.0378386	732	592
DLX3	1.74e-05	458	732
DMAP1	0.0071875	1059	592
DMBX1	0.0154628	473	666
DMC1	0.0216439	486	652
DMPK	0.0040392	2036	592
DMRT3	0.014784	1332	568
DMRTC1B	0.040988	1332	596
DMXL2	0.0162927	1502	596
DNAH17	0.0294572	1059	593
DNAH2	0.0454094	485	666
DNAH6	0.0341144	702	592
DNAH7	0.0125725	NA	568
DNAH9	0.0046416	NA	593
DNAI1	0.0319807	NA	596
DNAI2	0.0020274	1332	596
DNAJB11	0.0231761	518	684
DNAJB2	0.0433134	738	596
DNAJB5	0.0294058	1502	596
DNAJB7	0.0166483	1502	592
DNAJC13	0.0423745	545	684
DNAJC19	0.0043608	458	691
DNAJC21	0.0193038	545	684
DNAJC27	0.0126374	1332	593
DNAJC30	0.0156029	NA	607
DNAJC5	0.007648	2036	592
DNASE1L2	0.0162453	NA	593
DND1	0.0019885	2182	568
DNM1	0.0213016	738	596
DNMBP	0.0226129	485	661
DNTTIP2	0.0224086	518	684
DOC2B	0.0220568	1332	568
DOHH	0.0060323	2182	596
DOM3Z	0.0058512	1130	568
DOPEY1	0.0440559	1130	596
DPCR1	0.0336789	511	661
DPEP3	0.0171251	738	592
DPH1	0.0004335	2182	592
DPM1	0.0377585	517	661
DPM2	0.0217474	1130	598
DPM3	0.0306949	1130	598
DPP7	0.013834	738	598
DPP8	0.0394983	545	661
DPY19L2	0.0130063	NA	593
DPY30	0.028645	517	661
DPYD	0.0414484	592	661
DPYS	0.0448073	1502	593
DR1	0.0018237	518	695
DRG2	0.0287957	738	596
DSCAM	0.0428376	1332	596
DSCAML1	0.017164	702	596
DSCC1	0.0426965	498	652
DSCR9	0.0045457	1130	593
DSG2	0.009315	485	666
DSG3	0.000989	394	691
DTL	0.0123678	517	661
DTNA	0.0015303	1502	593
DTWD1	0.0490899	593	661
DTX3	0.0270662	2182	593
DTX3L	0.0001136	476	702
DULLARD	0.0034192	2182	592
DUSP15	0.0007556	NA	568
DUSP4	0.0385915	473	661
DVL1	0.0075376	466	661
DYM	0.0415054	592	684
DYNLRB2	0.0164399	702	596
E2F1	0.0233223	517	634
E2F6	0.0250471	1502	592
E2F7	0.0304105	498	661
E2F8	0.0119413	517	652
EARS2	0.0043846	518	684
EBF4	0.000155	2182	592
EBPL	0.0372532	473	627
ECD	0.0194647	532	691
ECHDC2	0.0218644	1059	593
ECT2	0.0001471	485	695
EDA	0.0276579	1332	598
EDEM1	0.0083673	545	695
EDF1	0.0145526	2036	596
EFCAB4A	0.0172307	466	652
EFCAB5	0.030574	702	593
EFHA2	0.0048125	2182	593
EFHC1	0.0063987	NA	593
EFNA5	0.0201317	476	666
EFNB1	0.0109818	430	661
EFR3A	0.0158237	518	691
EFR3B	0.005394	1332	568
EGF	0.0284556	481	684
EGFL6	0.0423243	486	661
EGFL7	0.0143237	NA	596
EGFR	0.0447187	518	652
EGLN2	0.0210189	691	593
EGR4	0.0014828	2182	592
EHBP1	0.0452444	486	661
EI24	0.0030144	394	691
EID2	0.0478994	666	593
EID2B	0.0069575	NA	598
EIF1AD	0.0363123	518	661
EIF2A	0.023524	486	661
EIF2AK2	0.0086012	518	695
EIF2S1	0.0363505	545	661
EIF2S3	0.0385678	486	684
EIF3A	0.010954	518	684
EIF3E	0.0060901	486	691
EIF3G	0.0422857	2182	596
EIF3H	0.0063565	473	661
EIF3J	0.0017781	518	691
EIF3M	0.0395026	498	634
EIF4EBP1	0.0152032	485	666
EIF4EBP3	0.0105058	473	661
EIF4G1	0.0154187	518	634
ELAC2	0.0091501	2182	593
ELAVL4	0.0473212	691	603
ELF3	0.0237104	470	652
ELFN1	0.0195395	732	568
ELK3	0.0343264	545	684
ELMO1	0.0119543	1332	593
ELMOD2	0.044563	545	661
ELOVL2	0.0007916	1502	532
ELP2P	0.0263036	702	592
EMD	0.0405346	1130	593
EMID1	0.0198803	NA	593
EMID2	0.032168	913	568
EML3	0.0415839	732	593
EML5	0.0028225	NA	593
EML6	0.0363257	2036	598
EMP1	0.030629	568	666
ENAM	0.0229594	1130	596
ENHO	0.0041924	NA	593
ENO1	0.0290645	473	684
ENTHD1	0.0047412	473	684
ENTPD7	0.014597	545	684
ENY2	0.0228633	545	652
EP400	0.033991	702	596
EPB41L3	0.0065222	1502	593
EPHA10	0.0414553	702	596
EPHA2	0.0478024	473	661
EPHB2	0.0099656	460	684
EPHX2	0.0432733	1332	603
EPHX4	0.0047811	458	661
EPM2A	0.0003219	2182	592
EPOR	0.0021285	1130	532
EPR1	0.010599	460	652
EPS8	0.0034506	518	684
EPSTI1	0.0154236	486	666
EPX	0.0014475	1502	568
ERAP2	0.0279254	532	684
ERAS	0.0034476	2036	592
ERCC6L	0.0035255	498	652
EREG	0.0002503	365	691
ERGIC2	0.0013566	467	691
ERLIN1	0.0066259	486	691
ERO1L	0.0006057	458	684
ERP29	0.0183157	666	596
ESCO2	0.021345	498	652
ESF1	0.0336978	545	666
ESPL1	0.0077756	473	684
ESRP1	0.021071	485	652
ESYT2	0.0058252	545	695
ETV2	0.0036719	2036	592
ETV3	0.0078313	518	684
ETV7	0.0233184	517	627
EVL	0.0007273	NA	592
EXO1	0.0284132	517	684
EXOC1	0.0197771	518	691
EXOC3L	0.0246376	738	596
EXOC3L2	0.0024335	1059	593
EXOC6B	0.025324	545	661
EXOC7	0.0210408	732	592
EXOG	0.0107936	2036	596
EXT2	0.0137825	592	684
EXTL1	0.0431149	732	592
EZH2	0.0016339	485	684
F3	0.0119478	485	691
F5	0.023012	1130	592
F7	0.0357785	1130	596
FAAH	0.0040547	1059	592
FAM107A	0.0325431	1332	596
FAM108A1	0.0019761	NA	593
FAM108C1	0.0184252	485	666
FAM110B	0.0086155	1332	568
FAM111B	0.0003333	460	684
FAM113A	0.0043513	NA	593
FAM117A	0.0015355	1502	592
FAM118A	0.0064419	2036	592
FAM123A	0.0006373	2182	532
FAM125B	0.0045618	NA	593
FAM127A	0.0131193	2036	593
FAM128B	0.0040456	NA	596
FAM132A	0.0466869	485	652
FAM135B	0.0446218	702	593
FAM154B	0.0016929	NA	568
FAM156A	0.0418686	1059	593
FAM162A	0.0088852	473	691
FAM163A	0.019162	1332	596
FAM163B	0.002894	1502	532
FAM164C	0.0078171	702	593
FAM166B	0.0323348	1332	593
FAM171A2	0.0115097	NA	592
FAM180A	0.0238411	545	684
FAM181B	0.0015433	2036	592
FAM184A	0.0050268	1502	596
FAM184B	0.0165576	1332	598
FAM186A	0.0049323	2036	593
FAM18A	0.0386248	1059	593
FAM195B	0.0060138	2036	592
FAM196B	0.0003099	460	691
FAM19A2	0.0034867	1502	568
FAM19A5	0.0360079	738	592
FAM200B	0.0033975	2036	568
FAM22A	0.0262607	NA	596
FAM25A	0.0001316	366	695
FAM25B	0.0038886	473	684
FAM27A	0.0036855	1130	568
FAM3C	0.026176	481	661
FAM40A	0.0256843	702	592
FAM45B	0.0004983	486	695
FAM47C	0.0493466	1130	592
FAM53B	0.0127648	1332	545
FAM58A	0.0343531	691	596
FAM59A	0.0310654	476	684
FAM5B	0.0008416	NA	596
FAM63B	0.0199074	592	661
FAM64A	0.0123878	485	652
FAM66A	0.0005687	NA	568
FAM66C	0.0220055	702	592
FAM69B	0.0002524	NA	592
FAM71F1	0.0309436	NA	598
FAM71F2	0.0030681	1502	545
FAM73B	0.0184446	2036	592
FAM83A	0.0032247	460	691
FAM83B	0.0014981	517	684
FAM83D	0.00055	430	684
FAM83H	0.0078993	458	652
FAM95B1	0.0043387	1059	592
FAM98B	0.0246874	545	661
FANCB	0.0035263	517	684
FANCI	0.0010983	460	684
FANCL	0.0471197	473	661
FARSB	0.0068735	517	691
FAS	0.0489177	545	661
FASTK	0.0047462	738	593
FBF1	0.0240449	732	593
FBLL1	0.0465008	NA	603
FBRSL1	0.0153811	2182	593
FBXL15	0.0019162	NA	593
FBXL18	0.0017997	2036	532
FBXO10	0.0091908	1502	592
FBXO15	0.0024937	NA	593
FBXO16	0.0160251	NA	596
FBXO22	0.0035723	466	691
FBXO44	0.0001479	2036	568
FBXO45	0.0012649	498	695
FBXO9	0.0428976	1332	592
FBXW4	0.0096845	NA	596
FCF1	0.0142547	545	652
FCHSD1	0.0285326	1059	592
FER1L4	0.0305818	485	652
FERMT1	0.0494436	545	666
FES	0.025941	738	545
FFAR2	0.0259073	738	596
FFAR3	0.0303754	1130	603
FGD4	0.0218782	518	661
FGD6	0.0034354	517	695
FGF13	0.0199141	1332	598
FGF17	0.0030287	2036	592
FGF2	0.0032365	545	691
FGF23	0.0383543	473	666
FGF8	0.0106227	421	666
FGF9	0.0094262	1502	568
FGFBP3	0.0405629	2182	603
FHL1	0.0026622	1502	593
FHOD3	0.0137117	486	661
FIGNL2	0.0093211	2036	592
FIS1	0.016625	NA	598
FIZ1	0.015525	732	593
FKBP1AP1	0.0072732	481	691
FKBP2	0.0282813	1059	593
FKRP	0.0011732	NA	593
FLI1	0.0260913	1332	593
FLJ11235	0.036242	702	592
FLJ13224	0.0122163	1059	568
FLJ35024	0.0226348	738	592
FLJ35390	0.0246013	NA	596
FLJ37201	0.0424897	NA	596
FLJ37307	0.0425276	1332	593
FLJ37453	0.0475925	2036	598
FLJ39653	0.0022773	NA	593
FLJ40330	0.0448715	913	593
FLJ41941	0.0336701	913	593
FLJ42875	0.0406758	1059	592
FLJ43663	0.02124	NA	598
FLJ44606	0.0087657	1130	593
FLJ45244	0.0476595	732	598
FLJ45445	0.0453695	732	596
FLNB	0.0005138	458	666
FLRT3	0.0007433	430	684
FLT3LG	0.0058957	2182	593
FLYWCH1	0.0050936	2036	568
FLYWCH2	5.3e-06	NA	532
FMR1	0.0364914	518	684
FN3K	0.0016195	2036	592
FNDC3B	0.0441433	545	684
FOLH1	0.0266759	466	684
FOXA2	0.0033761	NA	593
FOXD4	0.0154033	2036	593
FOXD4L1	0.0045588	2182	593
FOXD4L6	0.0031899	1502	568
FOXJ1	0.0230274	NA	592
FOXK1	0.0030555	2036	592
FOXM1	0.0166111	476	634
FOXP3	0.0167507	913	532
FOXP4	0.0071163	2036	592
FRMD5	0.0097711	481	652
FRMPD1	0.0429161	1332	607
FUBP1	0.0040483	486	695
FUNDC2	0.0344456	NA	603
FXR1	0.0264864	518	652
FXYD6	0.003977	1502	593
FZD6	0.0001935	467	691
FZD8	0.0075013	1130	532
G3BP1	0.0053056	518	691
GABARAP	0.0309847	1332	598
GABRA1	0.0051072	1332	568
GABRA5	0.0468555	1059	545
GABRB2	0.011343	1130	592
GABRB3	0.0454218	702	598
GABRP	0.0011773	485	691
GADD45G	0.0008276	NA	592
GADL1	0.0105101	1502	568
GALNT1	0.042206	545	666
GALNT10	0.0013365	486	684
GALNTL1	6.65e-05	1502	518
GALR3	0.0249414	NA	596
GALT	0.0026852	NA	593
GAN	9.96e-05	460	695
GAPDHS	0.0033697	2036	592
GAR1	0.0452393	511	661
GARNL3	0.0048476	2182	598
GART	0.0226476	518	652
GATS	0.0465345	913	596
GATSL2	0.0482063	695	593
GBA2	0.0133159	1130	596
GBP2	0.0052931	473	666
GBP4	0.0400367	593	634
GBP6	0.0043332	473	661
GBP7	0.0040511	486	661
GC	0.037634	1332	596
GCH1	0.0019254	1502	568
GCKR	0.0386189	511	652
GDAP1	0.0370278	1332	596
GDAP1L1	0.0157643	1332	598
GDF1	0.0234299	NA	596
GDF11	0.0133275	1502	568
GDF7	0.040859	NA	596
GDI1	0.0013077	2036	568
GDPD5	0.0182975	913	568
GEMIN7	0.0109434	1059	592
GGCX	0.0175843	517	666
GGPS1	0.0210683	532	684
GGT7	0.0036673	1130	592
GIGYF1	0.0028542	NA	592
GINS1	6.33e-05	430	695
GINS4	0.0179707	498	661
GIPC3	0.0222228	702	593
GIT1	0.0079903	2036	592
GJB3	0.0083656	511	666
GJB4	0.0230662	518	691
GJB5	0.0135355	511	684
GKAP1	0.0010437	NA	598
GKN1	0.0014413	394	684
GKN2	0.0021088	394	652
GLI4	0.0063183	2036	593
GLRX3	0.0411084	532	684
GLT25D1	0.0168163	460	652
GLTSCR1	0.002079	2036	568
GLUD1	0.0029448	486	691
GLUD2	0.0118656	518	684
GMPS	0.0004466	460	695
GNA12	0.0440456	1332	603
GNAI3	0.0335813	545	684
GNAL	0.0331036	1332	593
GNAO1	0.0326124	1332	593
GNAT2	0.0008824	1502	518
GNB3	2.28e-05	NA	545
GNE	0.0147185	486	652
GNG12	0.0441758	545	661
GNG2	0.021718	1332	593
GNG7	0.0006935	NA	545
GNL2	0.0034519	518	702
GNL3	0.027489	517	666
GNL3L	0.0174494	545	684
GNPNAT1	0.0138978	485	684
GOLGA2B	0.0205871	2036	596
GOLGA4	0.038869	518	684
GOLGA6L10	0.0378915	1059	593
GOLGA6L9	0.0295767	732	592
GOLGA8B	0.0176366	1059	593
GOLGA8G	0.0376723	1059	592
GOLGB1	0.0196145	545	661
GOLPH3L	0.0224943	485	666
GOLT1B	0.0422747	545	661
GP9	0.0300564	738	593
GPATCH2	0.0445946	532	661
GPC2	0.0053888	738	568
GPD2	0.0211323	486	661
GPLD1	0.0146601	1332	568
GPR111	0.0177373	486	661
GPR113	0.0142702	1332	593
GPR115	0.0364813	518	652
GPR150	0.0154083	NA	593
GPR160	0.0487515	511	652
GPR162	0.0184587	738	593
GPR173	0.0044792	1332	568
GPR45	0.0336955	732	592
GPR6	0.0200744	2036	593
GPR75	0.0054629	1332	545
GPR77	0.0241796	517	666
GPR83	0.0338109	738	596
GPR87	0.002317	466	691
GPR98	0.0091413	NA	598
GPRC5A	0.0071489	470	691
GPRIN1	0.0150136	1130	592
GPS1	0.0481105	732	596
GRAMD1A	0.0344404	738	592
GRAMD4	0.0236434	738	592
GRASP	0.0251553	1059	596
GRB7	0.0303181	394	661
GREB1L	0.0083202	460	661
GRHL2	0.0361179	518	634
GRIA1	0.0175726	1332	596
GRIA2	0.0254378	1332	593
GRIK1	0.0019708	1059	518
GRIK5	0.0014718	2182	568
GRK4	0.002198	1502	518
GRM1	0.0163459	1332	568
GRM3	0.0299373	732	592
GRM6	0.0036093	1332	593
GRM7	0.0234666	1332	596
GRPEL2	0.0181891	517	691
GRRP1	0.0215777	1332	593
GSDMC	0.0106432	460	652
GSPT1	0.0009567	486	702
GSTO1	0.0349356	481	661
GSTP1	0.0215143	473	661
GTF2A1	0.0191418	518	684
GTF2B	0.0224733	486	691
GTF2E2	0.0427598	473	661
GTF2F1	0.0159932	2182	592
GTF2H3	0.0145272	517	684
GTF2IP1	0.0293278	1502	596
GTF2IRD2P1	0.0009826	1059	532
GTF3C2	0.042255	517	661
GTPBP10	0.0141392	517	695
GTPBP4	0.0213927	517	691
GTPBP5	0.0006004	2182	592
GUSB	0.0174123	1502	593
GUSBL2	0.0135292	2182	596
GUSBP3	0.0043266	1502	592
GYG2	0.0376802	738	593
H1FNT	0.0214952	2182	596
H2BFXP	0.0035541	732	593
HACL1	0.0367919	1332	592
HAGH	0.047873	738	592
HAP1	0.0174859	2036	596
HAPLN3	0.0067853	498	666
HAR1A	0.0400944	1332	596
HAS2	0.0297905	545	666
HAS2AS	0.0209964	545	666
HAUS2	0.0044354	518	695
HAVCR1	0.010427	511	661
HBA1	0.0042725	1502	592
HCLS1	0.0299291	1059	545
HCN2	0.0268321	NA	596
HCN4	0.0230527	913	593
HCRT	0.021777	1130	596
HDAC10	0.0040668	2182	592
HDAC6	0.0357984	2036	596
HDGF	0.0030239	473	684
HDHD1A	0.0395827	511	652
HELB	0.003856	517	661
HERC1	0.0298569	702	596
HERC2	0.0305528	702	592
HERC2P4	0.0003361	NA	568
HERC4	0.0097378	517	661
HERC6	0.0148264	486	666
HES2	0.0059751	473	666
HEXDC	0.0033906	NA	593
HFE	0.0227689	545	661
HFM1	0.0001929	2036	532
HHEX	0.007072	913	545
HHIP	0.0477587	470	666
HIATL1	0.0172881	518	684
HIATL2	0.0148758	2036	596
HIF1A	0.0309243	545	661
HILS1	0.0459543	2182	592
HIP1	0.0339228	545	661
HIST1H1C	0.0080872	473	652
HIST1H2BJ	0.0045971	470	661
HIST1H2BK	0.0491578	532	661
HIST1H2BM	0.0454451	532	652
HIST1H2BO	0.023307	473	652
HIST1H3B	0.0341966	498	652
HIST1H3H	0.0007659	473	684
HIST1H4C	0.0353185	467	652
HIST1H4E	0.0313578	1059	593
HIST1H4H	0.0077699	476	652
HIST2H2AC	0.0414766	1130	596
HIST2H2BF	0.0383112	470	661
HJURP	2.48e-05	393	695
HLF	0.0304722	913	596
HMGA1	0.0077538	394	661
HMGA2	0.0187312	473	666
HMGN2	0.0138519	2036	598
HMGN3	0.0050805	NA	596
HMGXB4	0.0030153	518	684
HMMR	0.0052437	485	684
HMX1	0.0122166	738	545
HNF1A	0.0175688	NA	596
HNMT	0.025849	467	652
HNRNPA3P1	0.0273726	518	661
HNRNPC	0.0234771	518	661
HNRNPF	0.0326947	518	652
HNRNPR	0.0383647	532	684
HNRNPU	0.0362703	545	661
HNRPLL	0.0300005	545	691
HOMER1	0.0112531	545	684
HOOK2	0.0009444	NA	568
HORMAD1	0.0368989	702	592
HOXB4	0.0419001	1502	592
HOXD11	0.0447324	470	666
HP1BP3	0.0242173	517	661
HPGD	0.0337292	470	661
HPX	0.0362872	732	592
HRAS	0.0459863	2036	596
HRASLS	0.0009524	NA	568
HRASLS2	0.0056968	517	666
HRASLS5	0.0205495	517	666
HRCT1	0.0445131	545	684
HRH1	0.0013213	498	691
HRH3	0.0060129	NA	568
HS2ST1	0.0392733	545	684
HS3ST4	0.0116531	1332	593
HS6ST3	0.032905	1332	593
HSBP1L1	3.39e-05	375	666
HSD11B1L	0.045571	NA	596
HSD17B10	0.0205734	2036	596
HSD17B11	0.0043135	476	691
HSD17B14	0.0199365	738	596
HSD17B3	0.0055227	2036	593
HSF1	0.0333475	498	634
HSF2BP	0.0100608	498	684
HSF4	0.0199114	1059	593
HSFX2	0.0286063	2036	593
HSN2	0.0110314	486	684
HSPA1A	0.0374692	466	634
HSPA4	0.005876	545	691
HSPBP1	0.011617	738	592
HSPD1	0.0333672	518	652
HTR6	0.0301745	NA	593
IARS	0.048676	545	684
ID4	0.0008759	2182	568
IDE	0.0071583	518	695
IDO1	0.0402203	568	652
IDO2	0.0063551	1332	592
IFFO1	0.0153722	738	596
IFI27L2	0.0377272	1130	598
IFI44L	0.0365591	517	661
IFIT1	0.0385171	517	661
IFIT2	0.0437379	517	661
IFIT3	0.0470809	517	652
IFNAR1	0.0442241	592	661
IFNW1	0.0431494	738	603
IFT20	0.0056174	1332	568
IGF2BP1	0.0359217	486	661
IGF2BP3	0.0298495	532	652
IGFL1	0.0167666	476	661
IGFL3	0.0031377	473	666
IKBKG	0.0381299	702	596
IL11	0.0496241	518	634
IL11RA	0.0038647	1502	593
IL15RA	0.0005825	375	666
IL1F8	0.0243004	470	691
IL1R2	0.0382323	473	634
IL1RAP	0.0094144	518	684
IL20RB	0.0026295	460	666
IL22RA1	0.0405722	518	691
IL31RA	0.0041424	518	666
IL7	0.0076838	517	652
ILKAP	0.0114969	738	593
IMPAD1	0.0283282	593	652
INADL	0.0304209	518	652
INCA1	0.0005007	1502	545
INCENP	0.0005872	460	695
ING5	0.0007484	2182	592
INHBA	0.0050738	486	684
INPP5E	0.0104903	2036	592
INPP5J	0.0017445	2036	568
INPP5K	0.0083477	2182	592
INSIG2	5.68e-05	430	691
INSL5	0.0176018	2036	596
INSM1	0.0406825	702	596
INSM2	0.0402947	1502	596
INTS3	0.0233327	732	596
IP6K1	0.0497202	702	568
IP6K3	0.0442889	1059	592
IPMK	0.0311828	517	684
IPO7	6.68e-05	467	732
IQCC	0.0255686	732	593
IQGAP1	0.0093255	486	691
IQSEC1	0.0265236	702	596
IRAK2	0.0050973	430	661
IRAK4	0.0148884	1502	545
IRF2BP1	0.0016289	2036	592
IRF6	0.0416353	518	684
IRGQ	0.0198208	732	568
ISCU	0.0130531	1332	593
ISL1	0.0136523	1332	593
ISOC2	0.0085526	1059	568
ISYNA1	0.0336593	732	593
ITGA2B	0.0465585	738	596
ITGA3	0.0175519	470	652
ITGA6	0.0368498	518	661
ITGAE	0.0201459	NA	596
ITGAV	0.0313818	545	684
ITGB1	0.0168142	518	684
ITGB5	0.024503	470	652
ITGB6	0.0001298	460	691
ITGB8	0.0022801	486	695
ITIH5	0.0255288	913	545
JAG1	0.0060638	486	684
JAK3	0.0185587	1332	592
JAKMIP1	0.0118269	NA	596
JMJD5	0.0019369	NA	545
JPH4	0.0241107	1332	596
JRKL	0.0123344	517	666
JUB	0.0233588	517	661
KANK3	0.0191162	732	596
KATNAL2	0.0013535	NA	593
KBTBD11	0.0366194	485	666
KCMF1	0.015197	517	691
KCNAB3	0.0050799	738	592
KCNC4	0.0132937	738	596
KCND2	0.0335394	545	661
KCNE1L	0.0037287	1059	532
KCNE2	0.0491194	732	593
KCNH1	0.0429161	738	596
KCNH2	0.0006984	2182	568
KCNH3	0.0453856	702	596
KCNH4	0.0257918	1332	568
KCNH6	0.0304723	1332	593
KCNIP2	0.01647	1502	596
KCNJ11	0.0413776	1332	598
KCNK12	0.0170776	2036	596
KCNK15	0.0154456	1130	593
KCNMA1	0.0019721	2182	593
KCNN1	0.0359538	1059	593
KCNN4	0.0463754	511	661
KCNT2	0.0263343	1332	596
KCTD1	0.0431673	476	652
KCTD13	0.0240884	732	596
KCTD14	0.0012503	473	684
KCTD19	0.0011532	NA	592
KCTD2	0.0008411	1502	532
KDELC2	0.0260894	545	684
KDELR3	0.0168167	511	684
KDM1A	0.0256485	430	652
KDM4B	0.0299955	732	568
KDM5B	0.0358356	486	661
KGFLP1	0.0114657	1332	593
KHDRBS2	0.0027711	1332	592
KIAA0101	0.0099746	498	652
KIAA0114	0.0010998	1130	568
KIAA0195	0.0009083	2036	545
KIAA0319	0.0024991	NA	568
KIAA0391	0.0047342	476	684
KIAA0415	0.0009338	2036	568
KIAA0494	0.0049933	518	695
KIAA0895L	0.0150456	732	596
KIAA1045	0.00932	1502	593
KIAA1324	0.0183801	913	568
KIAA1383	0.0366768	702	598
KIAA1409	0.0160964	913	568
KIAA1524	0.007789	517	684
KIAA1609	0.0139636	532	691
KIAA1683	0.0070754	1130	545
KIAA1908	0.0075639	1502	593
KIF11	0.007607	485	652
KIF12	0.0137242	1059	593
KIF14	0.0024295	485	684
KIF15	0.0162736	498	634
KIF18A	0.0101785	517	634
KIF18B	0.0109645	498	652
KIF1A	0.0218603	1332	598
KIF20A	0.0022704	460	652
KIF20B	0.0003305	486	702
KIF23	0.0006407	460	684
KIF25	0.0007423	1059	511
KIF26A	0.0079021	NA	593
KIF2C	0.0196862	485	652
KIF4A	0.0002401	460	695
KIF4B	0.0233582	517	652
KIF6	0.0153573	695	593
KIFC1	0.002694	473	666
KIFC2	0.0293495	1059	593
KIFC3	0.0108334	NA	592
KLF3	0.0012608	458	684
KLF5	0.0413728	485	661
KLF6	0.0346618	518	661
KLHDC1	0.0010011	NA	592
KLHDC2	0.0197171	1332	596
KLHDC3	0.0029965	2036	593
KLHDC4	0.0038341	2182	592
KLHDC7B	0.0083139	486	652
KLHDC8A	0.0248525	732	568
KLHDC9	0.0221942	738	596
KLHL20	0.02692	592	684
KLHL22	0.0029876	NA	593
KLHL3	0.0090269	1059	592
KLHL32	0.0017635	1332	593
KLHL5	0.0206187	518	661
KLK9	0.0149977	498	666
KLRB1	0.0241358	1059	596
KNDC1	0.0346409	NA	598
KPNA2	0.0416518	498	652
KRAS	0.0226671	518	652
KRBA1	0.0044656	NA	592
KRBA2	0.0187109	1502	593
KRT13	0.002254	517	666
KRT14	0.0010791	460	684
KRT17	0.0037918	460	666
KRT19	0.0334474	498	666
KRT222	0.021528	1332	596
KRT6A	0.0092969	481	661
KRT7	0.0142265	511	661
KRT72	0.0095371	1332	592
KRT78	0.0065922	498	661
KRT83	0.0200807	460	666
KRT9	0.0116179	473	666
KTELC1	0.0143056	518	691
KYNU	0.0343516	517	661
L3MBTL	0.0069418	1059	592
LACTB	0.0343258	593	652
LAMA3	0.0357403	545	627
LAMA5	0.0399017	732	593
LAMB4	0.0422851	1502	598
LAMC2	0.033163	545	634
LANCL2	0.0157354	1332	593
LAPTM4A	0.0038035	518	702
LARP1B	0.0194479	485	691
LARP4	0.0298645	545	695
LASS3	0.0015513	NA	593
LASS4	0.0143871	NA	593
LASS5	0.0184685	2036	592
LASS6	0.0265994	532	695
LATS1	0.0271614	545	661
LCAT	0.0471074	738	592
LCE1E	0.0069422	470	666
LCE3D	0.0119761	470	666
LCN12	0.0148901	NA	596
LCP1	0.0432476	913	593
LDHA	5.03e-05	458	695
LDHAL6A	0.0469048	732	568
LEMD1	0.002302	473	691
LEMD2	0.0224812	738	592
LENG1	0.0042001	2036	593
LENG8	0.0160446	1059	592
LEPREL1	0.0307833	473	634
LEPROT	0.0114626	518	691
LETM2	0.0436929	473	652
LFNG	0.048863	476	684
LGALS9	0.0364404	511	652
LGR4	0.0298608	545	684
LHB	0.0138829	470	652
LHFPL1	8.11e-05	2036	518
LIFR	0.0122272	1332	568
LIG3	0.0307209	517	684
LIMA1	0.0015909	485	695
LIMS1	0.0346794	545	684
LIN37	0.0213148	738	592
LIN7B	0.0011797	2036	593
LINGO3	0.0002034	1332	532
LINGO4	0.0071273	1332	592
LIPE	0.0120124	1502	596
LIPJ	0.0175291	1332	545
LLGL2	0.0011718	2036	592
LLPH	0.0108482	486	691
LMBR1L	0.0040977	2036	592
LMNB1	0.0039693	486	661
LMO4	0.0391522	532	652
LMO7	0.0281818	473	652
LOC100128288	0.0016289	NA	593
LOC100128542	0.0382156	1332	596
LOC100128811	0.0105924	1332	598
LOC100128822	0.0049771	NA	593
LOC100129066	0.0011552	1332	532
LOC100129387	0.0288044	1502	596
LOC100129534	0.034041	2036	596
LOC100130386	0.0222121	695	593
LOC100130557	0.014749	1059	568
LOC100131193	0.0042204	1332	568
LOC100131726	0.0152169	481	666
LOC100132287	0.0004369	2036	568
LOC100132354	0.0066705	1332	593
LOC100133161	0.0082876	2036	592
LOC100133331	0.0446974	732	593
LOC100133669	0.0400792	486	661
LOC100133893	0.0009471	2036	592
LOC100133985	0.0039269	NA	593
LOC100134713	0.0301887	738	593
LOC100144604	0.0020356	2036	545
LOC100188947	0.0029818	476	684
LOC100190938	0.0402915	1332	596
LOC100216001	0.0112162	481	684
LOC100216545	0.0138612	2182	593
LOC100270804	0.0424752	1059	596
LOC100272216	0.009892	1130	568
LOC100286844	0.0146996	913	593
LOC100303728	0.021432	NA	598
LOC121952	0.011404	1059	596
LOC144486	0.0034709	2036	593
LOC144571	0.0271678	702	596
LOC145837	0.0041564	1332	593
LOC147727	0.0108943	NA	598
LOC149134	0.0006792	2182	545
LOC158572	0.0406118	702	596
LOC219347	0.0015157	2036	592
LOC282997	0.0174423	1332	592
LOC283392	0.0227926	473	666
LOC283404	0.0124927	470	684
LOC284232	0.0242086	486	684
LOC284440	0.002099	NA	592
LOC284578	0.0045937	481	661
LOC285359	0.0048887	2036	596
LOC285401	0.0463692	702	592
LOC285419	0.0179268	1130	592
LOC285830	0.0310737	473	652
LOC286367	0.0176513	1332	593
LOC286467	0.0042687	473	661
LOC338758	0.0035309	1332	593
LOC338799	0.0026171	NA	592
LOC339047	0.0013663	NA	593
LOC339290	0.0057056	NA	568
LOC342346	0.0068851	NA	545
LOC349114	0.0148397	2036	593
LOC388242	0.0264343	511	634
LOC389332	0.005516	1130	568
LOC389705	0.012144	913	545
LOC390595	0.0045301	1059	545
LOC391322	0.0035972	NA	596
LOC399744	0.0062862	732	568
LOC400027	0.0285244	1130	596
LOC400657	0.0083975	1332	596
LOC400759	0.0399123	545	652
LOC400891	0.0050184	NA	593
LOC401127	0.0079116	1059	592
LOC401431	0.0009008	NA	593
LOC401588	0.0302212	1332	596
LOC440957	0.0055017	2036	592
LOC442459	0.0040082	485	661
LOC494141	0.0386567	1059	596
LOC642597	0.0303402	702	545
LOC644165	0.001537	1332	545
LOC644172	0.0496943	NA	596
LOC653113	0.0098185	1059	592
LOC728392	0.0116256	NA	596
LOC728554	0.0266134	498	661
LOC728643	0.0139679	481	652
LOC728723	0.0072876	1502	593
LOC728743	0.0026768	NA	592
LOC729020	0.0350093	545	661
LOC729176	0.046817	545	684
LOC729234	0.0100664	2036	593
LOC729991	0.000981	2182	593
LOC731779	0.0305795	481	661
LOC84740	0.0464291	511	661
LOH12CR2	0.0042633	NA	592
LONP2	0.0091037	518	695
LOX	0.0389248	545	661
LPCAT2	0.0230939	486	666
LPCAT4	0.0070286	460	661
LPHN1	0.0008553	2182	532
LPPR1	0.0071647	1332	592
LPPR2	0.0288421	738	592
LPPR3	0.0198948	NA	593
LQK1	0.0193377	1130	592
LRCH1	0.0338999	518	684
LRFN3	0.0099238	738	593
LRGUK	0.0098595	1059	568
LRIG2	0.0278741	545	661
LRIG3	0.0496702	511	652
LRP1B	0.0179997	1130	568
LRP2BP	0.0239333	732	593
LRP3	0.0026637	NA	592
LRPAP1	0.0021312	NA	593
LRPPRC	0.0062329	517	695
LRRC1	0.006055	486	684
LRRC14	0.0074069	NA	592
LRRC16B	0.0004555	NA	592
LRRC24	0.0106325	NA	596
LRRC27	0.0013132	NA	593
LRRC29	0.0121615	NA	592
LRRC36	0.0352417	913	592
LRRC37A	0.0192796	NA	596
LRRC37A2	0.0236626	NA	596
LRRC37A3	0.0090183	2036	592
LRRC37B	0.0154878	NA	596
LRRC46	0.0171918	2036	596
LRRC48	0.0030041	NA	593
LRRC49	0.0395054	666	592
LRRC4B	0.0010888	NA	593
LRRC50	0.0036268	NA	545
LRRC56	0.0016889	2036	568
LRRC67	0.0007172	NA	568
LRRC7	0.0058005	2182	596
LRRC8B	0.0338613	532	661
LRRC8E	0.0025907	518	666
LRRFIP2	0.0317532	486	666
LRRTM1	0.0235076	2036	596
LRRTM2	0.0486374	913	593
LRSAM1	0.0494624	2036	603
LRWD1	0.0004255	NA	545
LSM12	0.0183864	518	661
LSMD1	0.0152721	738	596
LTB4R	0.0196218	1502	596
LTB4R2	0.0490131	2182	598
LUC7L	0.0230501	738	593
LUZP2	0.040513	593	661
LUZP6	0.032708	545	684
LY6D	9.24e-05	458	691
LY6E	0.0098119	460	661
LY6G5B	0.0139136	1130	592
LY6G5C	0.0007298	2036	592
LY6G6C	0.0060508	470	691
LY6H	0.0187289	1059	592
LY75	0.0420684	532	684
LYAR	0.0236798	467	661
LYNX1	0.0281343	498	666
LYPLA1	0.0184287	517	661
LZIC	0.0155102	517	695
LZTR1	0.0475433	738	593
MAD2L1	0.036679	517	652
MADD	0.0409467	702	568
MAFF	0.0276768	498	661
MAGEA12	0.0332581	1059	592
MAGED2	0.0245099	1332	592
MAGED4	0.0011645	2036	593
MAGED4B	0.0151493	2036	593
MAGEE1	0.010865	1332	596
MAGEH1	0.026846	738	593
MAGOHB	0.0221901	485	661
MAGT1	0.0140032	518	684
MAK	0.0121429	1332	593
MAL2	0.0173067	518	691
MAML2	0.0277677	545	684
MAN2A1	0.0435945	545	661
MAP1B	0.0290181	913	568
MAP2	0.0324154	1332	593
MAP2K7	0.0270646	2182	568
MAP3K12	0.0482533	702	593
MAP3K13	0.029893	518	652
MAP4K5	0.0089301	545	684
MAP6	0.0088631	1332	568
MAP7D2	0.0253828	1332	593
MAPK10	0.0222059	1332	596
MAPK11	0.0059915	1502	593
MAPK4	0.0267452	2182	603
MAPK8	0.0296515	518	684
MAPK8IP1	0.0411399	1332	598
MAPK8IP3	0.0265069	1059	593
MAPKBP1	0.0033571	NA	568
MARK1	0.0245935	1502	593
MARK4	0.0064026	2036	568
MARS2	0.0300812	532	661
MASP2	0.0195366	1502	593
MAST3	0.0332638	702	593
MASTL	0.0023519	517	684
MAT2B	0.0247663	518	691
MATK	0.0110609	1059	593
MBD3	0.00921	732	593
MBD4	0.013878	517	691
MBLAC1	0.0265488	702	596
MBNL2	0.0024762	486	684
MBNL3	0.0064234	518	684
MBOAT2	0.043266	532	634
MC1R	0.0216074	2182	593
MCF2L	0.0017787	2036	568
MCM10	0.0067013	498	684
MCM3AP	0.0081228	738	592
MCM4	0.0037777	460	666
MCOLN1	0.000285	NA	568
MCOLN3	0.0236592	702	598
MCRS1	0.044109	702	596
MDH1B	0.0221634	NA	596
MDM1	0.0432344	1502	596
MDM2	0.0004223	485	732
MECOM	0.0044014	485	691
MED13L	0.0491395	545	684
MED15	0.0082782	460	666
MED21	0.040335	518	661
MED22	0.015887	738	592
MED24	0.0307796	2036	598
MED26	0.0258633	738	592
MED9	0.0223461	2182	593
MEGF8	0.0114958	738	568
MEIS3	0.0266257	2036	593
MELK	0.0128977	485	661
MET	4.11e-05	394	695
METAP1	0.0166032	518	661
METT5D1	0.0142039	518	691
METTL11B	0.0049396	473	661
METTL5	0.0207608	511	666
MEX3C	0.0288762	518	666
MFN1	0.0004776	486	732
MFSD2B	0.0123216	381	652
MGC16275	0.0008879	1502	593
MGC16703	0.0152778	1332	592
MGC21881	0.0112688	2036	592
MGC23270	0.0044969	NA	592
MGC23284	0.0004585	NA	532
MGC3771	0.0449092	NA	598
MGC42105	0.0082628	1502	593
MGC57346	0.0171596	1130	593
MGLL	0.0062852	511	695
MICAL1	0.0020939	NA	593
MIER1	0.0075279	518	691
MIS12	0.0120928	1502	568
MKI67	0.0100691	498	695
MKI67IP	0.0441493	545	661
MKKS	0.0139329	1059	593
MKLN1	0.0073963	518	684
MKS1	0.0298978	702	593
MLL4	0.0267915	738	592
MLLT1	0.049949	732	568
MLXIPL	0.005656	NA	598
MLYCD	0.0010917	1502	568
MMAA	0.0264381	518	684
MMACHC	0.0315962	518	661
MMADHC	0.0112935	517	661
MMD2	0.0067947	1502	592
MMP28	0.0034385	470	666
MMP3	0.0015784	517	691
MND1	0.0481007	532	652
MOAP1	0.0023955	2182	592
MOBKL1B	0.0037917	518	684
MOBKL2A	0.0436354	1130	592
MOCOS	0.015657	518	684
MORN1	0.0279443	738	593
MORN4	0.0028012	1332	568
MPL	0.0499679	1332	596
MPP1	0.0204961	1502	593
MPP2	0.0439581	702	568
MPPED1	0.0463102	1332	596
MPPED2	0.0324501	913	596
MPZ	0.0463538	1332	598
MRAP	0.0392981	1502	596
MRE11A	0.0448594	517	652
MRO	0.0129194	1332	593
MRP63	0.0050491	2036	593
MRPL13	0.0047448	485	691
MRPL16	0.0029884	466	661
MRPL19	4.99e-05	486	702
MRPL27	0.0375455	913	593
MRPL3	0.0023517	518	695
MRPL34	0.0033868	NA	593
MRPL35	0.0417529	532	691
MRPL37	0.0193774	498	652
MRPL38	0.0312288	2036	598
MRPL39	0.0020351	517	695
MRPL41	0.0268759	738	593
MRPL52	0.0270881	485	634
MRPS22	0.0033822	518	695
MRPS26	0.0199213	2036	596
MRPS6	0.0059086	498	691
MRTO4	0.0041826	498	652
MSH2	0.0191217	518	691
MSH4	0.0145043	2182	593
MSI1	0.0077235	NA	593
MSLN	0.0202897	466	661
MST1	0.0002279	2036	568
MSTN	0.0054421	2036	592
MSX2P1	0.0301945	1130	596
MT1E	0.0076519	498	691
MT1H	0.0154956	498	684
MT1L	0.0032263	470	684
MTA1	0.0085297	2036	568
MTA3	0.0267142	486	661
MTCP1NB	0.0087866	NA	593
MTDH	0.0101077	545	691
MTERFD2	0.0132883	1502	593
MTERFD3	0.0022885	NA	593
MTFR1	0.0295296	532	684
MTG1	0.0224104	1059	596
MTHFD1	0.0107175	517	652
MTHFD2	0.0301241	592	652
MTIF2	0.0023679	486	702
MTMR2	0.0055867	486	684
MTMR9L	0.0069815	2036	592
MTP18	0.0426545	394	652
MTPAP	0.0061276	486	661
MTUS2	0.0063865	1332	598
MUC16	0.0224606	481	661
MUC21	0.0008981	470	666
MUM1	0.0022855	738	592
MXD1	0.012542	421	661
MXD4	0.0096535	NA	593
MYBL2	0.0270604	498	627
MYEF2	0.0410407	732	593
MYEOV	0.0107352	485	652
MYEOV2	0.0315721	738	598
MYH16	0.0017891	470	691
MYH3	0.0059738	1502	592
MYH7B	0.0071248	NA	593
MYL4	0.0477292	913	568
MYNN	0.0009592	517	684
MYO5B	0.0407145	511	652
MYOF	0.0004274	460	691
MYT1	0.0248813	1332	596
MZF1	0.0067987	738	592
N4BP2L2	0.0056603	1502	592
NAA15	0.0110446	518	691
NAA50	0.0001931	486	695
NAAA	0.0304999	684	568
NAALADL2	0.0470216	518	661
NAB1	0.0028006	486	684
NAE1	0.037428	532	661
NAGS	0.0110766	460	691
NAIP	0.0096553	702	568
NAMPT	0.012023	486	652
NANOS1	0.0478813	1332	603
NANOS3	0.0451584	691	593
NAP1L2	0.0098118	1332	596
NAPB	0.0101979	1502	596
NAPEPLD	0.015989	485	666
NAPG	0.0483582	486	684
[truncated: 1,489 more rows]

## Sheet: Table S3
Table SIII. ​G-protein coupled receptor-related genes obtained from WikiPathways.
Gene symbol
EDNRA
IL8RB
UTS2R
GPR18
CELSR3
GPR
OR7E35P
IL8RA
ALG6
GRM8
DRD3
P2RY13
OR7E19P
GPR56
HSA10
LPHN3
GPR83
OR8G1
Q9BYT4
GPR145
GPR77
OR1F1
GPR135
HSA12
OR5D3P
OR3A4
ADORA2A
CXCR3
GRCA
GPR132
HTR1F
OR2A20P
HRH4
GRM1
GPR88
F2R
OR2H1
MASS1
FSHR
CHRM2
TAAR3
OR1R1P
GNRHR
GHRHR
OR10A5
ADRA1D
DRD4
HTR2A
OR2F1
OR51A1P
HSA8
HSA3
P2RY11
CNR1
EDG1
OR2A4
OR5-85
GPR84
CCKBR
RLN3R1
P47889
OR7E24
OR1G1
GPR73L1
CELSR1
LGR6
GPR17
GPR55
HTR7
Q9H2C7
EBI2
OR5D3
OR3A1
OR1E3P
GRPR
SMO
OR10A1
FY
OR2B6
ADRB2
GPR62
OR2M4
OR1N1
CCR2
GPR143
O60411
LTB4R2
CHRM3
GPR133
OR2A9P
OR10A2
OR7E18P
PTGFR
LPHN2
NTSR1
HSA1
Q9UEB1
OR2A5
EMR3
GPR116
TAAR5
OR3A3
TAAR2
OR5E1P
OR1J5
CCR5
VN1R1
ADORA3
OR1E1
OR8G2
CELSR2
SSTR2
GPR61
LGR7
EMR2
NPY2R
GALR3
TACR1
BDKRB2
FPR1
AGTR2
NMBR
AVPR2
TAC4
BLR1
AGTR1
SSTR4
BDKRB1
NTSR2
CXCR4
NPY5R
CCR7
FPRL1
ATP8A1
FPRL2
OPRM1
AVPR1A
GALR1
CCKAR
MC3R
LHCGR
CX3CR1
GHSR
CCR8
CCR-9
SSTR3
EDNRB
MC4R
TSHR
TACR3
BRS3
TRHR
AVPR1B
CXCR6
MC2R
NPY1R
SSTR5
TACR2
MC5R
MC1R
PPYR1
OXTR
OPRK1
CCR1
SSTR1
GALR2
OPRD1
OPRL1
CCR10
NPY6R
C3AR1
C5R1
CCR3
CCR4
CCR6
HCRTR1
HCRTR2
MTNR1A
CNR2
GPR50
PTGER1
PTGER2
EDG5
PTGER4
EDG3
TBXA2R
PTAFR
EDG2
PTGIR
PTGDR
PTGER3
EDG6
MTNR1B
CALCR
CALCRL
CRHR1
CRHR2
GIPR
GLP2R
GLP1R
GCGR
PTHR2
PTHR1
ADCYAP1R1
SCTR
VIPR1
VIPR2
CD97
EMR1
LPHN1
ELTD1
GPR64
GPR32
OR1E2
RRH
XCR1
OR10H3
DRD2
GPR52
P2RY10
F2RL1
P2RY4
HTR2B
CYSLTR2
OR7C1
OR5V1
MAS1L
GPR85
CCRL1
GPR42
P2RY6
GPR8
OR7C2
GPR15
GPR37L1
OR12D3
GPR6
OR8B8
P2RY2
GPR92
GPR39
OR7A17
OPN1MW
F2RL3
Rgr
OR2S2
OR2J2
ADRA2A
MLNR
HTR4
OR10A4
ADORA1
NMUR2
OPN4
HTR1B
GPR19
GPR22
RHO
OR7A10
CMKLR1
NMUR1
ADRA2C
GPR31
GPR41
GPR24
GPR161
CHRM4
OR2W1
OR2B3
OR2H2
OR5F1
GPR37
GPR173
ADRA1B
GPR34
OR1D2
OR1D5
P2RY1
HTR5A
ADRB1
GPR68
HTR6
LTB4R
OR6A2
OR1C1
GPR65
GPR35
GPR1
OR5U1
GPR109B
HTR1E
HTR1A
OR2F2
OR2B2
GPR174
OR10H1
GPR74
OR8D2
GPR63
OPN3
GPR7
GPR10
GPR45
CCRL2
OPN1SW
GPR81
P2RY14
GPR3
OR10J1
OR1A1
HRH3
GPR44
GPR23
ADORA2B
F2RL2
OR2J3
OR5I1
GPR40
CCBP2
ADRB3
OR2D2
ADRA1A
CMKOR1
GPR43
OR7A5
OR10H2
GPR87
OR2J1
OR2N1P
OR3A2
OR2T1
OR1D4
AGTRL1
DRD5
GPR21
P2RY5
OR1A2
SUCNR1
CYSLTR1
GPR30
GPR4
ADRA2B
GPR20
GPR27
CHRM1
HRH1
OR2AG1
GPR147
HRH2
P2RY12
HTR2C
GPR171
OR1Q1
MAS1
DRD1
OPN1LW
Q9UDD9
OR11A1
OR2C1
HTR1D
OR6B1
GPR75
GPR12
GPR25
CCR9
OR1I1
CHRM5
GRM5
GRM2
GRM3
GRM4
GRM7
GRM6
CASR
GABBR1
GPR51
GPRC5D
GPRC5C
GPRC5B
GPRC5A
HTR5B

## Sheet: Table S4
Table SIV. Sample information curated from ChIP-Atlas.
ID	Assay	Primary tissue	Cell name	Link
SRX10119387	Chip-seq (YAP1)	Breast cancer cells	MDA-MB-231	https://chip-atlas.org/view?id=SRX10119387
SRX10205599	Chip-seq (YAP1)	Breast cancer cells	CAL-120	https://chip-atlas.org/view?id=SRX10205599
SRX3511910	Chip-seq (YAP1)	Dermal fibroblast	HDF	https://chip-atlas.org/view?id=SRX3511910
SRX4213899	Chip-seq (YAP1)	Normal breast epithelial cells	MCF10A	https://chip-atlas.org/view?id=SRX4213899
SRX5887611	Chip-seq (YAP1)	Non-small cell lung cancer cells	PC9	https://chip-atlas.org/view?id=SRX5887611
SRX10634383	Chip-seq (YAP1)	Keratinocytes	Keratinocytes	https://chip-atlas.org/view?id=SRX10634383
SRX757325	Chip-seq (YAP1)	Malignant pleural mesothelioma cells	NCI-H2052	https://chip-atlas.org/view?id=SRX757325
SRX716555	Chip-seq (YAP1)	Glioblastoma cells	SF268	https://chip-atlas.org/view?id=SRX716555
SRX1038945	Chip-seq (YAP1)	Lung Fibroblasts	IMR90	https://chip-atlas.org/view?id=SRX1038945
SRX5718140	Chip-seq (YAP1)	Embryonic kidney cells	293	https://chip-atlas.org/view?id=SRX5718140
SRX14181215	Chip-seq (YAP1)	Prostate cancer cells	DU 145	https://chip-atlas.org/view?id=SRX14181215
SRX15210835	ATAC-seq	Pancreatic cancer cells	PANC1	https://chip-atlas.org/view?id=SRX15210835
SRX5502958	ATAC-seq	Pancreatic cancer cells	CFPAC1	https://chip-atlas.org/view?id=SRX5502958
SRX9452639	ATAC-seq	Pancreatic cancer cells	PA-TU-8902	https://chip-atlas.org/view?id=SRX9452639
SRX9452640	ATAC-seq	Pancreatic cancer cells	PA-TU-8902	https://chip-atlas.org/view?id=SRX9452640
SRX9452641	ATAC-seq	Pancreatic cancer cells	PA-TU-8902	https://chip-atlas.org/view?id=SRX9452641
SRX9452642	ATAC-seq	Pancreatic cancer cells	PA-TU-8902	https://chip-atlas.org/view?id=SRX9452642
SRX14613259	ATAC-seq	Prostate cancer cells	PCa3	https://chip-atlas.org/view?id=SRX14613259
SRX14613260	ATAC-seq	Prostate cancer cells	PCa3	https://chip-atlas.org/view?id=SRX14613260
SRX14613265	ATAC-seq	Prostate cancer cells	PCa3	https://chip-atlas.org/view?id=SRX14613265
SRX14613266	ATAC-seq	Prostate cancer cells	PCa3	https://chip-atlas.org/view?id=SRX14613266
SRX14613267	ATAC-seq	Prostate cancer cells	PCa3	https://chip-atlas.org/view?id=SRX14613267
SRX14613268	ATAC-seq	Prostate cancer cells	PCa3	https://chip-atlas.org/view?id=SRX14613268
SRX825380	H3K4me3	Pancreatic cancer cells	PANC1	https://chip-atlas.org/view?id=SRX825380
SRX190044	H3K4me3	Pancreatic cancer cells	CFPAC1	https://chip-atlas.org/view?id=SRX190044
SRX825400	H3K27ac	Pancreatic cancer cells	CFPAC1	https://chip-atlas.org/view?id=SRX825400
SRX19885669	H3K27ac	Pancreatic cancer cells	KLM1	https://chip-atlas.org/view?id=SRX19885669

## Sheet: Table S5
Table SV. ​101 Machine learning methods for prognostic model development.
Methods
Lasso + StepCox [both]
survival-SVM
CoxBoost + survival-SVM
Ridge
Lasso + survival-SVM
SuperPC
CoxBoost + Ridge
Enet [α=0.1]
CoxBoost + Enet [α=0.1]
Enet [α=0.2]
Enet [α=0.3]
CoxBoost + Enet [α=0.3]
CoxBoost + Enet [α=0.2]
Enet [α=0.4]
CoxBoost + Enet [α=0.4]
Lasso + CoxBoost
Enet [α=0.5]
CoxBoost
CoxBoost + Enet [α=0.5]
Enet [α=0.6]
CoxBoost + Enet [α=0.6]
CoxBoost + Enet [α=0.7]
CoxBoost + Enet [α=0.8]
Enet [α=0.8]
Enet [α=0.9]
Lasso
Enet [α=0.7]
CoxBoost + Enet [α=0.9]
CoxBoost + Lasso
Lasso + plsRcox
CoxBoost + plsRcox
CoxBoost + StepCox [forward]
Lasso + StepCox [forward]
RSF + survival-SVM
CoxBoost + SuperPC
StepCox [forward]
plsRcox
RSF + Ridge
RSF + Enet [α=0.1]
Lasso + SuperPC
RSF + plsRcox
RSF + StepCox [forward]
RSF + Enet [α=0.2]
RSF + Enet [α=0.3]
RSF + Enet [α=0.6]
RSF + Lasso
RSF + Enet [α=0.7]
RSF + Enet [α=0.5]
RSF + CoxBoost
RSF + Enet [α=0.9]
RSF + Enet [α=0.4]
RSF + Enet [α=0.8]
RSF + StepCox [both]
RSF + StepCox [backward]
StepCox [both] + Ridge
StepCox [backward] + Ridge
StepCox [both] + plsRcox
StepCox [backward] + plsRcox
StepCox [both] + Enet [α=0.9]
StepCox [backward] + Enet [α=0.9]
StepCox [both] + Enet [α=0.1]
StepCox [backward] + Enet [α=0.1]
StepCox [both] + Enet [α=0.8]
StepCox [backward] + Enet [α=0.8]
StepCox [both] + Enet [α=0.2]
StepCox [backward] + Enet [α=0.2]
StepCox [both] + Lasso
StepCox [backward] + Lasso
StepCox [both] + Enet [α=0.6]
StepCox [backward] + Enet [α=0.6]
CoxBoost + GBM
StepCox [both] + Enet [α=0.7]
StepCox [backward] + Enet [α=0.7]
Lasso + StepCox [backward]
StepCox [both]
StepCox [backward]
CoxBoost + StepCox [both]
CoxBoost + StepCox [backward]
StepCox [both] + Enet [α=0.4]
StepCox [backward] + Enet [α=0.4]
StepCox [both] + Enet [α=0.3]
StepCox [backward] + Enet [α=0.3]
StepCox [both] + CoxBoost
StepCox [backward] + CoxBoost
StepCox [both] + Enet [α=0.5]
StepCox [backward] + Enet [α=0.5]
CoxBoost + RSF
RSF + SuperPC
RSF
Lasso + GBM
RSF + GBM
GBM
StepCox [both] + survival-SVM
StepCox [backward] + survival-SVM
Lasso + RSF
StepCox [both] + GBM
StepCox [backward] + GBM
StepCox [both] + RSF
StepCox [backward] + RSF
StepCox [both] + SuperPC
StepCox [backward] + SuperPC

## Sheet: Table S6
Table SVI. ​MR results of pancreatic cancer and fexofenadine.
Outcome	Exposure	Method	nsnp	P-value	OR	Lower 95% CI	Upper 95% CI
Pancreatic cancer || id:ebi-a-GCST90018893	Fexofenadine || id:ukb-b-10433	MR Egger	18	0.252709	2.23361e-140	0	1.05335e+91
Pancreatic cancer || id:ebi-a-GCST90018893	Fexofenadine || id:ukb-b-10433	Weighted median	18	0.0454787	1.87842e-21	9.20739e-42	0.383219
Pancreatic cancer || id:ebi-a-GCST90018893	Fexofenadine || id:ukb-b-10433	Inverse variance weighted	18	0.00914337397208361	1.7102e-20	2.34314e-35	1.24823e-05
Pancreatic cancer || id:ebi-a-GCST90018893	Fexofenadine || id:ukb-b-10433	Simple mode	18	0.230804	3.08809e-23	9.76367e-59	9.76713e+12
Pancreatic cancer || id:ebi-a-GCST90018893	Fexofenadine || id:ukb-b-10433	Weighted mode	18	0.25803	1.38058e-21	1.59883e-56	119212444393261

## Sheet: Table S7
Table SVII: Pleiotropy and heterogeneity analyses of pancreatic cancer and fexofenadine.
Outcome	Exposure	Method	Heterogeneity test		MR-Egger
			Q	P-value	Intercept	Stanard error	P-value
Pancreatic cancer || id:ebi-a-GCST90018893	Fexofenadine || id:ukb-b-10433	MR Egger	8.1823	0.943253	0.14557451817431	0.142614	0.322555978291845
Pancreatic cancer || id:ebi-a-GCST90018893	Fexofenadine || id:ukb-b-10433	Inverse variance weighted	9.22424436930715	0.932962862375199

## Sheet: Table S8
Table SVIII. Relative YAP1 expression levels normalized to Actin and NC, derived from the experiments shown in Fig. 4C and D.
Cell	Group	YAP1/Actin Normalized Ratio
		Mean	SD
PANC1	NC	1	0.0278739
PANC1	siHRH1#1	0.734399	0.022837
PANC1	siHRH1#2	0.809782	0.0346657
PANC1	siYAP1	0.425189	0.00586678
SW1990	NC	1	0.0500122
SW1990	siHRH1#1	0.495263	0.0452804
SW1990	siHRH1#2	0.546035	0.0838814
SW1990	siYAP1	0.105073	0.0095637

## Sheet: Table S9
Table SIX. Relative YAP1 expression levels normalized to Actin and Control, derived from the experiments shown in Figure 4E and 4F.
Cell	Treatment (Histamine / Fexofenadine, μM)	YAP1/Actin normalized ratio
		Mean	SD
PANC1	0 / 0 (Control)	1	0.0225046
PANC1	0 / 10	0.573028	0.00856688
PANC1	10 / 0	1.53156	0.0386178
PANC1	10 / 10	0.84705	0.0264182
SW1990	0 / 0 (Control)	1	0.0153425
SW1990	0 / 10	0.691007	0.0171657
SW1990	10 / 0	1.20578	0.013861
SW1990	10 / 10	0.750358	0.0119944
